# Supplementary material for: Palladium-catalyzed reductive desulfonative aminocarbonylation of benzylsulfonyl chlorides with nitroarenes towards arylacetamides
Source: Royal Society of Chemistry journal article supplement (doi:10.1039/d2qo00110a), 2022-01-01

# Supporting Information

## **Palladium-Catalyzed Reductive Desulfonative Aminocarbonylation of Benzylsulfonyl Chlorides with Nitroarenes to Arylacetamides**

Yongzhu Liu,<sup>†</sup> Zhi-Peng Bao,<sup>†</sup> Xinxin Qi,<sup>\*,†</sup> and Xiao-Feng Wu<sup>\*,‡</sup>

<sup>†</sup>Department of Chemistry, Key Laboratory of Surface & Interface Science of Polymer Materials of Zhejiang Province, Zhejiang Sci-Tech University, Hangzhou 310018, China.

<sup>‡</sup>Dalian National Laboratory for Clean Energy, Dalian Institute of Chemical Physics, Chinese Academy of Sciences, 116023, Dalian, Liaoning, China; Leibniz-Institut für Katalyse e. V., Albert-Einstein-Straße 29a, 18059 Rostock, Germany.

---

# Table of Contents

|                                                                                                 |    |
|-------------------------------------------------------------------------------------------------|----|
| 1. General Information.....                                                                     | 1  |
| 2. Optimization of Reaction Conditions .....                                                    | 2  |
| 3. Experimental Section.....                                                                    | 5  |
| 3.1 General Procedure for the Synthesis of Benzylsulfonyl Chlorides.....                        | 5  |
| 3.2 General Procedure for the Synthesis of Compounds 4 and 6 .....                              | 6  |
| 3.3 General Procedure for the Synthesis of Benzylmethylsulfone.....                             | 7  |
| 3.4 General Procedure for Palladium-Catalyzed Benzylsulfonyl Chlorides with<br>Nitroarenes..... | 8  |
| 4. Characterization Data .....                                                                  | 9  |
| 4.1 Characterization Data of Compounds 4, 5, 6, 7.....                                          | 9  |
| 4.2 Characterization Data of the Corresponding Products.....                                    | 11 |
| 5. References.....                                                                              | 29 |
| 6. Copies of NMR Spectra .....                                                                  | 30 |

---

## 1. General Information

Unless otherwise noted, all reactions were carried out under N<sub>2</sub> atmosphere. All reagents were from commercial sources and used as received without further purification. All solvents were dry. Column chromatography was performed on silica gel (200-300 mesh size) using petroleum ether and ethyl acetate as eluent. NMR spectra were recorded on a Bruker Avance operating at for <sup>1</sup>H NMR at 400 MHz, <sup>13</sup>C NMR at 101 MHz and <sup>19</sup>F NMR at 377 MHz and spectral data were reported in ppm relative to tetramethylsilane (TMS) as internal standard and CDCl<sub>3</sub> (<sup>1</sup>H NMR δ 7.26, <sup>13</sup>C NMR δ 77.16), DMSO-*d*<sub>6</sub> (<sup>1</sup>H NMR δ 2.50, <sup>13</sup>C NMR δ 39.52) as solvent. All coupling constants (*J*) are reported in Hz. The following abbreviations were used to describe peak splitting patterns when appropriate: s = singlet, d = doublet, dd = double doublet, ddd = double doublet of doublets, t = triplet, dt = double triplet, q = quartet, m = multiplet, br = broad. Gas chromatography (GC) analyses were performed on a Shimadzu GC-2014C chromatograph equipped with a FID detector. Mass spectra (MS) were measured on spectrometer by direct inlet at 70 eV. Mass spectroscopy data of the products were collected on an HRMS-TOF instrument or Waters TOFMS GCT Premier using EI or ESI ionization. Melting points were measured with WRR digital point apparatus and not corrected.

## 2. Optimization of Reaction Conditions

Table S1. Screening of Solvents<sup>a</sup>

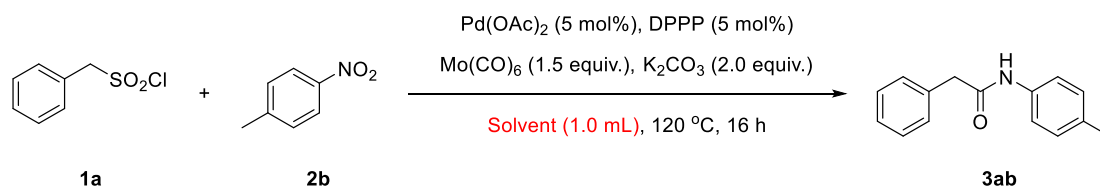

| Entry | Solvent            | Yield(%) |
|-------|--------------------|----------|
| 1     | CH <sub>3</sub> CN | 43       |
| 2     | 1,4-Dioxane        | 16       |
| 3     | THF                | 31       |
| 4     | DMF                | Trace    |
| 5     | DMSO               | N.D.     |
| 6     | Toluene            | 8        |

<sup>a</sup>Reaction conditions: **1a** (0.2 mmol), **2b** (0.3 mmol), Pd(OAc)<sub>2</sub> (5 mol%), DPPP (5 mol%), Mo(CO)<sub>6</sub> (1.5 equiv.), K<sub>2</sub>CO<sub>3</sub> (2.0 equiv.), Solvent (1.0 mL), 120 °C, 16 h. GC yield, with dodecane as the internal standard.

Table S2. Screening of Catalysts<sup>a</sup>

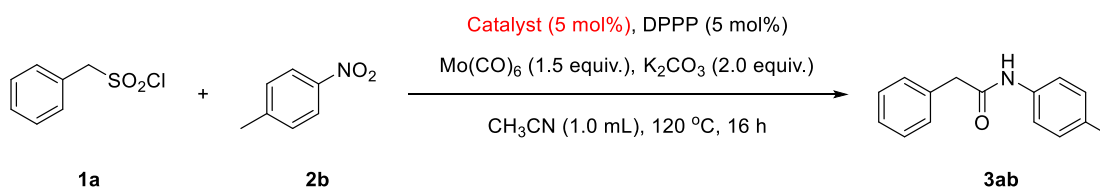

| Entry | Catalyst                           | Yield(%) |
|-------|------------------------------------|----------|
| 1     | Pd(OAc) <sub>2</sub>               | 43       |
| 2     | Pd(PPh <sub>3</sub> ) <sub>4</sub> | 40       |
| 3     | Pd <sub>2</sub> (dba) <sub>3</sub> | 36       |
| 4     | Pd(acac) <sub>2</sub>              | 27       |
| 5     | PdCl <sub>2</sub>                  | 23       |
| 6     | Pd(TFA) <sub>2</sub>               | 19       |

<sup>a</sup>Reaction conditions: **1a** (0.2 mmol), **2b** (0.3 mmol), Catalyst (5 mol%), DPPP (5 mol%), Mo(CO)<sub>6</sub> (1.5 equiv.), K<sub>2</sub>CO<sub>3</sub> (2.0 equiv.), CH<sub>3</sub>CN (1.0 mL), 120 °C, 16 h. GC yield, with dodecane as the internal standard.

Table S3. Screening of the Amount of **1a** and **2b**<sup>a</sup>

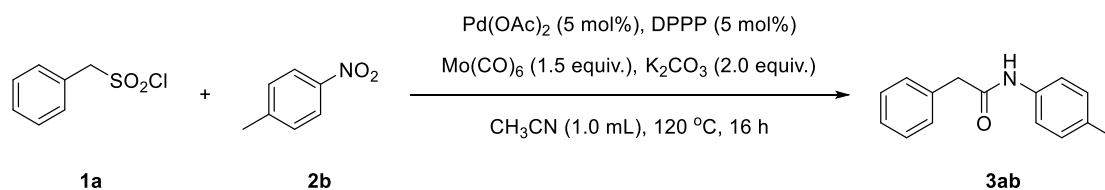

| Entry | Condition           | Yield(%) |
|-------|---------------------|----------|
| 1     | 1a : 2b = 0.2 : 0.2 | 38       |
| 2     | 1a : 2b = 0.3 : 0.2 | 47       |
| 3     | 1a : 2b = 0.4 : 0.2 | 56       |
| 4     | 1a : 2b = 0.5 : 0.2 | 52       |
| 5     | 1a : 2b = 0.6 : 0.2 | 34       |

<sup>a</sup>Reaction conditions: **1a** (x mmol), **2b** (0.2 mmol), Pd(OAc)<sub>2</sub> (5 mol%), DPPP (5 mol%), Mo(CO)<sub>6</sub> (1.5 equiv.), K<sub>2</sub>CO<sub>3</sub> (2.0 equiv.), CH<sub>3</sub>CN (1.0 mL), 120 °C, 16 h. GC yield, with dodecane as the internal standard.

Table S4. Screening of Bases<sup>a</sup>

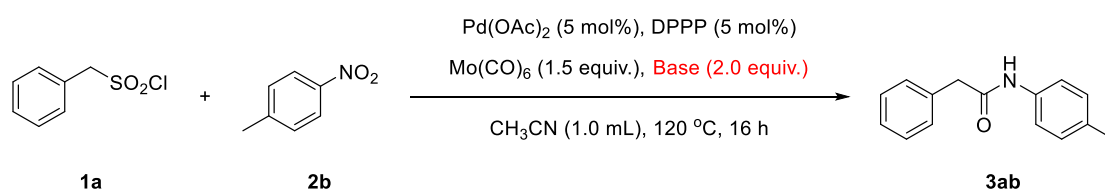

| Entry | Base                            | Yield(%) |
|-------|---------------------------------|----------|
| 1     | Cs <sub>2</sub> CO <sub>3</sub> | 42       |
| 2     | K <sub>3</sub> PO <sub>4</sub>  | 74       |
| 3     | KHCO <sub>3</sub>               | 55       |
| 4     | <i>t</i> -BuOK                  | 26       |
| 5     | Na <sub>2</sub> CO <sub>3</sub> | 57       |
| 6     | Na <sub>3</sub> PO <sub>4</sub> | 51       |
| 7     | Et <sub>3</sub> N               | 24       |
| 8     | DIPEA                           | 35       |
| 9     | DBU                             | 13       |

<sup>a</sup>Reaction conditions: **1a** (0.4 mmol), **2b** (0.2 mmol), Pd(OAc)<sub>2</sub> (5 mol%), DPPP (5 mol%), Mo(CO)<sub>6</sub> (1.5 equiv.), Base (2.0 equiv.), CH<sub>3</sub>CN (1.0 mL), 120 °C, 16 h. GC yield, with dodecane as the internal standard.

Table S5. Screening of Ligands<sup>a</sup>

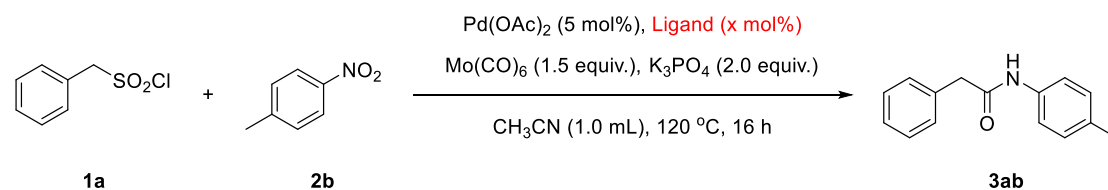

| Entry | Ligand           | Yield(%) |
|-------|------------------|----------|
| 1     | DPPF             | 57       |
| 2     | PPh <sub>3</sub> | 59       |
| 3     | Xantphos         | 56       |
| 4     | BINAP            | 63       |
| 5     | DPPB             | 72       |
| 6     | DPEphos          | 62       |

<sup>a</sup>Reaction conditions: **1a** (0.4 mmol), **2b** (0.2 mmol), Pd(OAc)<sub>2</sub> (5 mol%), mono-dentate ligand (10 mol%), bidentate ligand (5 mol%), Mo(CO)<sub>6</sub> (1.5 equiv.), K<sub>3</sub>PO<sub>4</sub> (2.0 equiv.), CH<sub>3</sub>CN (1.0 mL), 120 °C, 16 h. GC yield, with dodecane as the internal standard.

Table S6. Screening of the Additives<sup>a</sup>

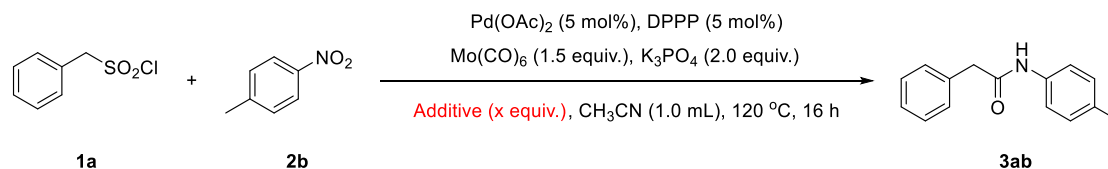

| Entry          | Additives          | Yield(%) |
|----------------|--------------------|----------|
| 1              | PhSiH <sub>3</sub> | 66       |
| 2              | Zn                 | 63       |
| 3 <sup>b</sup> | H <sub>2</sub> O   | 56       |

<sup>a</sup>Reaction conditions: **1a** (0.4 mmol), **2b** (0.2 mmol), Pd(OAc)<sub>2</sub> (5 mol%), DPPP (5 mol%), Mo(CO)<sub>6</sub> (1.5 equiv.), K<sub>3</sub>PO<sub>4</sub> (2.0 equiv.), CH<sub>3</sub>CN (1.0 mL), Additive (1.0 equiv.), 120 °C, 16 h. <sup>b</sup>0.5 equiv. H<sub>2</sub>O. GC yield, with dodecane as the internal standard.

### 3. Experimental Section

#### 3.1 General Procedure for the Synthesis of Benzylsulfonyl Chlorides

Benzylsulfonyl Chlorides were prepared according to literature.<sup>1</sup>

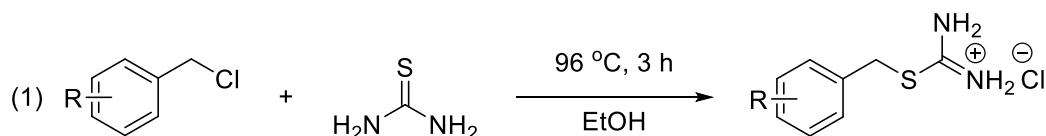

**Step 1:** An oven dried clean round-bottom flask was charged with magnetic stir-bar, the corresponding benzyl chloride (10 mmol) and thiourea (10 mmol, 762 mg). 10 mL of absolute ethanol was added and refluxed at 96 °C (oil bath). After 3 h the reaction was taken out and solvent was evaporated under reduced pressure to obtain white solid thiouric salt.

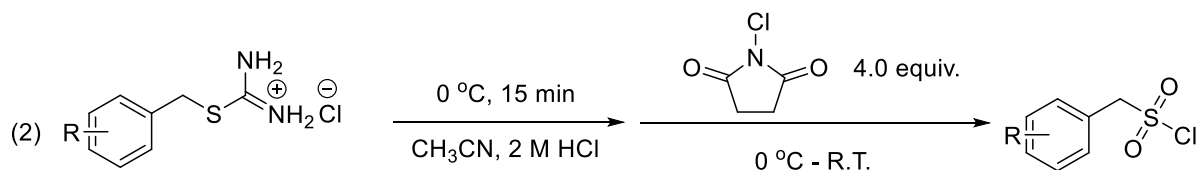

**Step 2:** The obtained solid salt was suspended in 14 mL of CH<sub>3</sub>CN and 3 mL 2 M HCl was added to it. The mixture was stirred at 0 °C (ice bath) for 15 min. N-chlorosuccinimide (NCS) (40 mmol, 5.342 g) was added in portion to the suspension in order to obtain a clear solution (Pay attention to the temperature of the reaction, if the temperature is higher than 25 °C (oil bath), put it into an ice bath to cool). The solution was stirred for another 30 min at room temperature. The solution was evaporated under reduced pressure to remove the CH<sub>3</sub>CN. The remaining aqueous portion was extracted with ethyl acetate (20 mL × 3). The organic portion was dried over anhydrous Na<sub>2</sub>SO<sub>4</sub> and the crude mixture was evaporated and purified by column chromatography using silica gel and petroleum ether/ethyl acetate as the eluent.

### 3.2 General Procedure for the Synthesis of Compounds 4 and 6

Compounds **4** and **6** were prepared according to literature.<sup>2</sup>

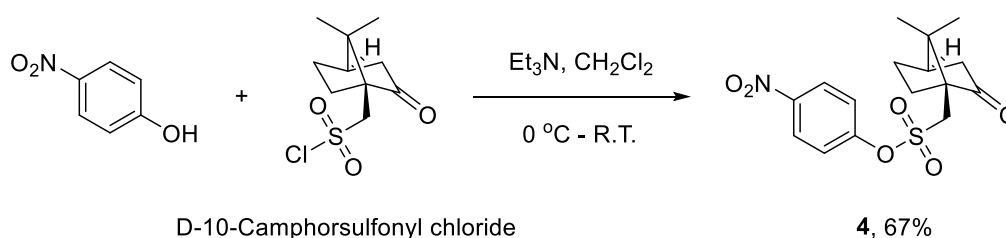

An oven dried clean round-bottom flask was charged with magnetic stir-bar, 4-nitrophenol (10 mmol, 1.391 g), D-10-Camphorsulfonyl chloride (10 mmol, 2.507 g). Dichloromethane (40 mL) and triethylamine (12 mmol, 1.215 g) was added slowly and stirred at 0 °C (ice bath), then stir the reaction mixture at room temperature until completed (monitored by TLC). The reaction mixture was then diluted with water (40 mL) and extracted with dichloromethane (20 mL × 3). The combined organic phases were dried over anhydrous Na<sub>2</sub>SO<sub>4</sub>. The crude mixture was evaporated and purified by column chromatography using silica gel and petroleum ether/ethyl acetate (10/1 to 5/1, volume ratio) as the eluent, afforded **4** as a white solid (2.35 g, 67% yield).

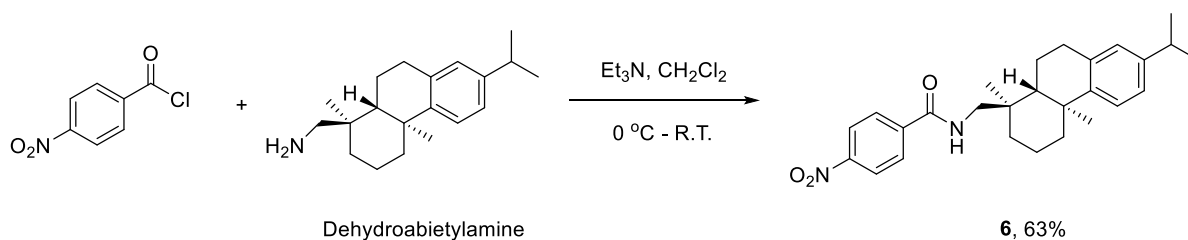

An oven dried clean round-bottom flask was charged with magnetic stir-bar, dehydroabietylamine (10 mmol, 2.854 g), 4-nitrobenzoyl chloride (12 mmol, 2.226 g). Dichloromethane (40 mL) and triethylamine (12 mmol, 1.215 g) was added slowly and stirred at 0 °C (ice bath), then stir the reaction mixture at room temperature until completed (monitored by TLC). The reaction mixture was then diluted with water (40 mL) and extracted with dichloromethane (20 mL × 3). The combined organic phases were dried over anhydrous Na<sub>2</sub>SO<sub>4</sub>. The crude mixture was evaporated and purified by column chromatography using silica gel and petroleum ether/ethyl acetate (5/1 to 2/1, volume ratio) as the eluent, afforded **6** as a white solid (2.75 g, 63% yield).



### 3.3 General Procedure for the Synthesis of Benzylmethylsulfone

Benzylmethylsulfone was prepared according to literature.<sup>3,4</sup>

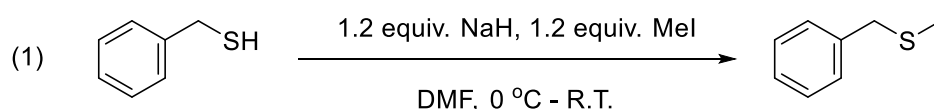

**Step 1:** An oven dried round-bottom flask was charged with phenylmethanethiol (10 mmol, 1.242 g) in DMF (20 mL) and stirred at 0 °C (ice bath) for 30 min. NaH (12 mmol, 480 mg, 60% dispersion in mineral oil) was added and the mixture was stirred at 0 °C for 30 min. MeI (12 mmol, 1.703 g) was added at 0 °C, warmed to room temperature then stir the reaction mixture at room temperature until completed (monitored by TLC). The reaction mixture was diluted with water (40 mL) and extracted with ethyl acetate (20 mL × 3). The combined organic layer was washed with brine and dried over anhydrous Na<sub>2</sub>SO<sub>4</sub>. The crude product was purified by column chromatography using silica gel and petroleum ether/ethyl acetate (100/1 to 30/1, volume ratio) as the eluent, afforded benzyl(methyl)sulfane as light yellow liquid (980 mg, 71% yield).

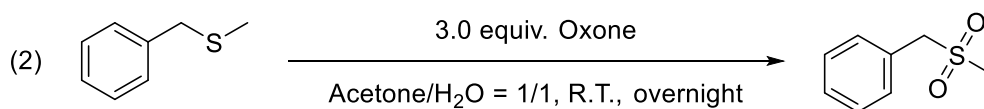

**Step 2:** An oven dried clean round-bottom flask was charged with magnetic stir-bar, benzyl(methyl)sulfane (5 mmol, 690 mg) and Oxone (15 mmol, 5.195 g). 20 mL of acetone and water mixture (acetone/water = 1/1, volume ratio) was added and then stir the reaction mixture at room temperature until completed (monitored by TLC). The reaction mixture was diluted with water (40 mL) and extracted with dichloromethane (20 mL × 3). The combined organic layer was washed with brine and dried over anhydrous Na<sub>2</sub>SO<sub>4</sub>. The crude product was purified by column chromatography using silica gel and petroleum ether/ethyl acetate (10/1 to 5/1, volume ratio) as the eluent, afforded benzylmethylsulfone as a white solid (625 mg, 74% yield).

### 3.4 General Procedure for Palladium-Catalyzed Benzylsulfonyl Chlorides with Nitroarenes

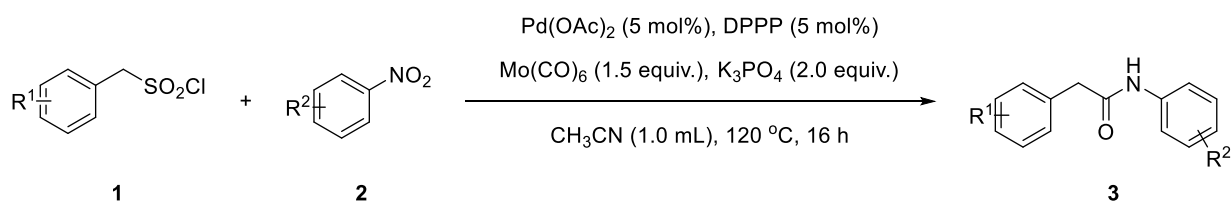

Under nitrogen atmosphere, **1** (0.4 mmol), **2** (0.2 mmol), Pd(OAc)<sub>2</sub> (5 mol %, 2.2 mg), DPPP (5 mol %, 4.1 mg), K<sub>3</sub>PO<sub>4</sub> (2 equiv., 84.9 mg) and Mo(CO)<sub>6</sub> (1.5 equiv., 79.2 mg) were added to an oven dried 15 mL *In-Ex* tube. Then CH<sub>3</sub>CN (1 mL) were added to the reaction. The tube was sealed and the mixture was stirred at 120 °C (oil bath) for 16 h. After the reaction was completed, the reaction mixture was filtered and concentrated under vacuum. The crude product was purified by column chromatography using silica gel and petroleum ether/ethyl acetate as the eluent, afford the corresponding product **3**, **5** and **7**.

1 mmol scale: Under nitrogen atmosphere, **1a** (2 mmol), **2a** (1 mmol), Pd(OAc)<sub>2</sub> (5 mol %), DPPP (5 mol %), K<sub>3</sub>PO<sub>4</sub> (2 equiv.) and Mo(CO)<sub>6</sub> (1.5 equiv.) were added to an oven dried 15 mL *In-Ex* tube. Then CH<sub>3</sub>CN (5 mL) were added to the reaction. The tube was sealed and the mixture was stirred at 120 °C (oil bath) for 16 h. After the reaction was completed, the reaction mixture was filtered and concentrated under vacuum. The crude product was purified by column chromatography using silica gel and petroleum ether/ethyl acetate as the eluent (10/1 to 5/1), afford the corresponding product **3aa** in 70% yield (147.7 mg).

## 4. Characterization Data

### 4.1 Characterization Data of Compounds 4, 5, 6, 7

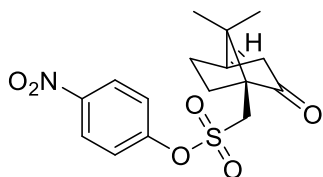

#### 4-nitrophenyl((1S,4R)-7,7-dimethyl-2-oxobicyclo[2.2.1]heptan-1-yl)methanesulfonate (4)

Purified by column chromatography (silica gel, petroleum ether/ethyl acetate = 10/1 to 5/1, volume ratio) to afford the title compound as a white solid (2.35 g, 67% yield).<sup>2</sup>

**<sup>1</sup>H NMR (400 MHz, CDCl<sub>3</sub>)**  $\delta$  8.31 (d,  $J$  = 9.1 Hz, 2H), 7.49 (d,  $J$  = 9.1 Hz, 2H), 3.86 (d,  $J$  = 15.0 Hz, 1H), 3.26 (d,  $J$  = 15.0 Hz, 1H), 2.55 – 2.40 (m, 2H), 2.18 (t,  $J$  = 4.5 Hz, 1H), 2.10 (tdd,  $J$  = 12.2, 7.9, 4.3 Hz, 1H), 2.00 (d,  $J$  = 18.6 Hz, 1H), 1.76 (ddd,  $J$  = 13.9, 9.4, 4.7 Hz, 1H), 1.49 (ddd,  $J$  = 13.0, 9.4, 3.9 Hz, 1H), 1.15 (s, 3H), 0.92 (s, 3H).

**<sup>13</sup>C NMR (101 MHz, CDCl<sub>3</sub>)**  $\delta$  214.0, 153.6, 146.3, 125.8, 122.9, 58.3, 48.8, 48.2, 42.9, 42.6, 27.0, 25.3, 20.0, 19.8.

**M.p.** 119.3 - 120.6 °C

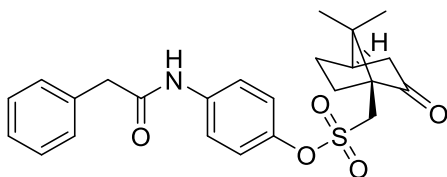

#### 4-(2-phenylacetamido)phenyl((1S,4R)-7,7-dimethyl-2-oxobicyclo[2.2.1]heptan-1-yl)methanesulfonate (5)

Purified by column chromatography (silica gel, petroleum ether/ethyl acetate = 5/1 to 2/1, volume ratio) to afford the title compound as a colorless oil (61.7 mg, 70% yield).

**<sup>1</sup>H NMR (400 MHz, CDCl<sub>3</sub>)**  $\delta$  7.46 (d,  $J$  = 7.8 Hz, 2H), 7.40 (dd,  $J$  = 10.7, 4.0 Hz, 2H), 7.33 (t,  $J$  = 7.5 Hz, 3H), 7.26 (brs, 1H), 7.21 (d,  $J$  = 8.7 Hz, 2H), 3.76 (dd,  $J$  = 15.2, 1.1 Hz, 1H), 3.73 (s, 2H), 3.15 (dd,  $J$  = 15.0, 0.9 Hz, 1H), 2.55 – 2.49 (m, 1H), 2.40 (d,  $J$  = 18.6 Hz, 1H), 2.13 (t,  $J$  = 4.2 Hz, 1H), 2.11 – 2.03 (m, 1H), 1.96 (d,  $J$  = 18.5 Hz, 1H), 1.70 (ddd,  $J$  = 13.8, 9.5, 4.3 Hz, 1H), 1.48 – 1.42 (m, 1H), 1.14 (s, 3H), 0.89 (s, 3H).

<sup>13</sup>C NMR (101 MHz, CDCl<sub>3</sub>) δ 214.2, 169.3, 145.4, 136.8, 134.3, 129.6, 129.4, 127.9, 122.8, 121.1, 58.2, 48.1, 47.5, 44.9, 43.0, 42.6, 27.0, 25.2, 20.1, 19.8.

HRMS (ESI) m/z: [M+H]<sup>+</sup> Calcd. for C<sub>24</sub>H<sub>27</sub>NO<sub>5</sub>S 442.1683; Found 442.1685.

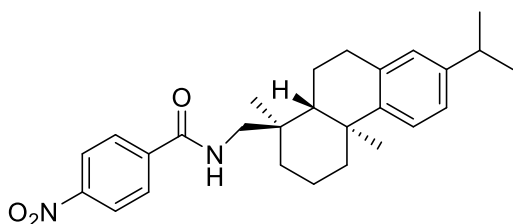

***N*-(((1*R*,4*aS*,10*aR*)-7-isopropyl-1,4*a*-dimethyl-1,2,3,4,4*a*,9,10,10*a*-octahydrophenanthren-1-yl)methyl)-4-nitrobenzamide (6)**

Purified by column chromatography (silica gel, petroleum ether/ethyl acetate = 5/1 to 2/1, volume ratio) to afford the title compound as a white solid (2.75 g, 63% yield).<sup>2</sup>

<sup>1</sup>H NMR (400 MHz, CDCl<sub>3</sub>) δ 8.20 (dd, *J* = 8.6, 2.1 Hz, 2H), 7.90 (dd, *J* = 8.6, 2.0 Hz, 2H), 7.19 (d, *J* = 8.1 Hz, 1H), 7.02 (d, *J* = 8.1 Hz, 1H), 6.91 (s, 1H), 6.61 (s, 1H), 3.49 (dd, *J* = 12.8, 5.7 Hz, 1H), 3.33 (dd, *J* = 12.8, 5.4 Hz, 1H), 2.96 (dd, *J* = 17.1, 6.1 Hz, 1H), 2.88 – 2.81 (m, 2H), 2.33 (d, *J* = 12.5 Hz, 1H), 1.99 (dd, *J* = 17.7, 5.2 Hz, 1H), 1.82 (dd, *J* = 26.0, 12.9 Hz, 2H), 1.70 (d, *J* = 11.7 Hz, 1H), 1.52 (t, *J* = 14.1 Hz, 2H), 1.40 (t, *J* = 12.8 Hz, 2H), 1.25 (d, *J* = 2.7 Hz, 6H), 1.23 (d, *J* = 2.2 Hz, 3H), 1.04 (s, 3H).

<sup>13</sup>C NMR (101 MHz, CDCl<sub>3</sub>) δ 165.9, 149.4, 146.9, 145.7, 140.5, 134.6, 128.2, 127.0, 124.2, 124.0, 123.7, 50.7, 45.8, 38.3, 37.9, 37.6, 36.4, 33.4, 30.4, 25.4, 24.0, 19.2, 18.8, 18.6.

M.p. 100.1 - 101.7 °C

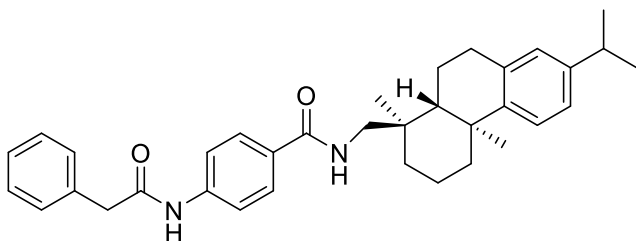

***N*-(((1*R*,4*aS*,10*aR*)-7-isopropyl-1,4*a*-dimethyl-1,2,3,4,4*a*,9,10,10*a*-octahydrophenanthren-1-yl)methyl)-4-(2-phenylacetamido)benzamide (7)**

Purified by column chromatography (silica gel, petroleum ether/ethyl acetate = 5/1 to 1/1, volume ratio) to afford the title compound as a white solid (65.2 mg, 62% yield).

**<sup>1</sup>H NMR (400 MHz, CDCl<sub>3</sub>)**  $\delta$  7.64 (d,  $J$  = 8.7 Hz, 2H), 7.48 (t,  $J$  = 7.5 Hz, 3H), 7.41 – 7.37 (m, 2H), 7.34 – 7.31 (m, 3H), 7.16 (d,  $J$  = 8.2 Hz, 1H), 6.99 (dd,  $J$  = 8.2, 1.6 Hz, 1H), 6.87 (d,  $J$  = 1.2 Hz, 1H), 6.11 (t,  $J$  = 6.3 Hz, 1H), 3.74 (s, 2H), 3.41 – 3.30 (m, 2H), 2.91 (dd,  $J$  = 17.1, 6.0 Hz, 1H), 2.85 – 2.76 (m, 2H), 2.29 (d,  $J$  = 12.7 Hz, 1H), 1.95 (dd,  $J$  = 13.1, 7.2 Hz, 1H), 1.84 – 1.73 (m, 2H), 1.71 – 1.68 (m, 1H), 1.52 – 1.46 (m, 2H), 1.35 (dd,  $J$  = 13.8, 3.8 Hz, 2H), 1.22 (d,  $J$  = 1.4 Hz, 6H), 1.20 (s, 3H), 0.99 (s, 3H).

**<sup>13</sup>C NMR (101 MHz, CDCl<sub>3</sub>)**  $\delta$  169.4, 167.1, 147.1, 145.8, 140.7, 134.8, 134.2, 130.5, 129.6, 129.4, 127.92, 127.89, 127.1, 124.3, 124.0, 119.4, 50.5, 46.0, 44.9, 38.5, 37.8, 37.7, 36.6, 33.5, 30.6, 25.6, 24.1, 19.2, 18.9, 18.8.

**M.p.** 145.3 - 147.2 °C

**HRMS (ESI) m/z:** [M+H]<sup>+</sup> Calcd. for C<sub>35</sub>H<sub>42</sub>N<sub>2</sub>O<sub>2</sub> 523.3319; Found 523.3320.

#### 4.2 Characterization Data of the Corresponding Products

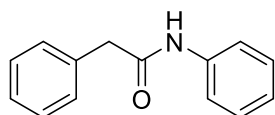

##### ***N*,2-diphenylacetamide (3aa)**

Purified by column chromatography (silica gel, petroleum ether/ethyl acetate = 10/1 to 5/1, volume ratio) to afford the title compound as a white solid (30.2 mg, 72% yield).<sup>5</sup>

**<sup>1</sup>H NMR (400 MHz, CDCl<sub>3</sub>)**  $\delta$  7.42 – 7.37 (m, 4H), 7.33 – 7.32 (m, 3H), 7.29 – 7.25 (m, 2H), 7.21 (brs, 1H), 7.07 (t,  $J$  = 7.4 Hz, 1H), 3.72 (s, 2H).

**<sup>13</sup>C NMR (101 MHz, CDCl<sub>3</sub>)**  $\delta$  169.3, 137.7, 134.6, 129.6, 129.4, 129.1, 127.8, 124.6, 120.0, 45.0.

**M.p.** 114.8 - 116.1 °C

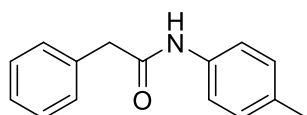

##### **2-phenyl-*N*-(*p*-tolyl)acetamide (3ab)**

Purified by column chromatography (silica gel, petroleum ether/ethyl acetate = 10/1 to 5/1, volume ratio) to afford the title compound as a white solid (33.4 mg, 74% yield).<sup>5</sup>

**<sup>1</sup>H NMR (400 MHz, CDCl<sub>3</sub>)**  $\delta$  7.56 (brs, 1H), 7.35 – 7.27 (m, 7H), 7.04 (d,  $J$  = 8.2 Hz, 2H), 3.64 (s, 2H), 2.26 (s, 3H).

<sup>13</sup>C NMR (101 MHz, CDCl<sub>3</sub>) δ 169.5, 135.3, 134.8, 134.1, 129.5, 129.4, 129.1, 127.5, 120.2, 44.6, 20.9.

M.p. 132.3 - 133.7 °C

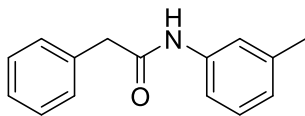

**2-phenyl-N-(*m*-tolyl)acetamide (3ac)**

Purified by column chromatography (silica gel, petroleum ether/ethyl acetate = 10/1 to 5/1, volume ratio) to afford the title compound as a white solid (32.8 mg, 73% yield).<sup>5</sup>

<sup>1</sup>H NMR (400 MHz, CDCl<sub>3</sub>) δ 7.45 (brs, 1H), 7.40 – 7.37 (m, 2H), 7.33 – 7.29 (m, 4H), 7.23 (d, *J* = 8.2 Hz, 1H), 7.16 (t, *J* = 7.8 Hz, 1H), 6.90 (d, *J* = 7.4 Hz, 1H), 3.70 (s, 2H), 2.29 (s, 3H).

<sup>13</sup>C NMR (101 MHz, CDCl<sub>3</sub>) δ 169.4, 138.9, 137.7, 134.7, 129.6, 129.2, 128.8, 127.6, 125.3, 120.7, 117.1, 44.8, 21.5.

M.p. 89.6 - 91.4 °C

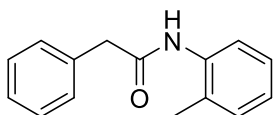

**2-phenyl-N-(*o*-tolyl)acetamide (3ad)**

Purified by column chromatography (silica gel, petroleum ether/ethyl acetate = 10/1 to 5/1, volume ratio) to afford the title compound as a white solid (31.2 mg, 69% yield).<sup>5</sup>

<sup>1</sup>H NMR (400 MHz, CDCl<sub>3</sub>) δ 7.89 (d, *J* = 8.1 Hz, 1H), 7.45 – 7.41 (m, 2H), 7.38 – 7.34 (m, 3H), 7.18 (t, *J* = 7.6 Hz, 1H), 7.09 (d, *J* = 7.2 Hz, 1H), 7.02 (t, *J* = 7.4 Hz, 1H), 6.92 (brs, 1H), 3.79 (s, 2H), 1.90 (s, 3H).

<sup>13</sup>C NMR (101 MHz, CDCl<sub>3</sub>) δ 169.1, 135.7, 134.9, 130.5, 129.8, 129.5, 128.3, 128.0, 126.9, 125.1, 122.3, 45.1, 17.2.

M.p. 153.4 - 156.2 °C

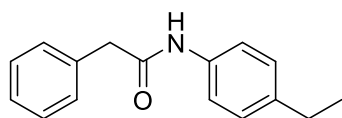

***N*-(4-ethylphenyl)-2-phenylacetamide (3ae)**

Purified by column chromatography (silica gel, petroleum ether/ethyl acetate = 10/1 to 5/1, volume ratio) to afford the title compound as a white solid (35.2 mg, 74% yield).<sup>5</sup>

**<sup>1</sup>H NMR (400 MHz, CDCl<sub>3</sub>)**  $\delta$  7.41 – 7.38 (m, 2H), 7.34 – 7.30 (m, 5H), 7.10 (d,  $J$  = 8.4 Hz, 3H), 3.73 (s, 2H), 2.59 (q,  $J$  = 7.6 Hz, 2H), 1.19 (t,  $J$  = 7.6 Hz, 3H).

**<sup>13</sup>C NMR (101 MHz, CDCl<sub>3</sub>)**  $\delta$  169.1, 140.7, 135.3, 134.7, 129.7, 129.3, 128.4, 127.8, 120.1, 44.9, 28.4, 15.8.

**M.p.** 110.9 - 112.4 °C

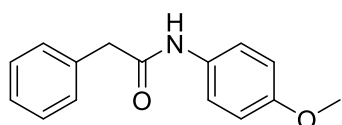

***N*-(4-methoxyphenyl)-2-phenylacetamide (3af)**

Purified by column chromatography (silica gel, petroleum ether/ethyl acetate = 5/1 to 2/1, volume ratio) to afford the title compound as a white solid (37.7 mg, 78% yield).<sup>5</sup>

**<sup>1</sup>H NMR (400 MHz, CDCl<sub>3</sub>)**  $\delta$  7.42 – 7.38 (m, 2H), 7.34 – 7.32 (m, 4H), 7.30 – 7.29 (m, 1H), 7.02 (brs, 1H), 6.81 (d,  $J$  = 9.0 Hz, 2H), 3.76 (s, 3H), 3.72 (s, 2H).

**<sup>13</sup>C NMR (101 MHz, CDCl<sub>3</sub>)**  $\delta$  169.1, 156.7, 134.7, 130.8, 129.7, 129.4, 127.8, 121.9, 114.2, 55.6, 44.8.

**M.p.** 124.6 - 125.4 °C

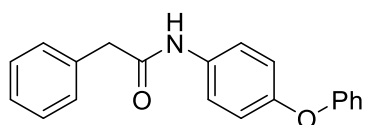

***N*-(4-phenoxyphenyl)-2-phenylacetamide (3ag)**

Purified by column chromatography (silica gel, petroleum ether/ethyl acetate = 10/1 to 5/1, volume ratio) to afford the title compound as a white solid (48.0 mg, 79% yield).<sup>5</sup>

**<sup>1</sup>H NMR (400 MHz, CDCl<sub>3</sub>)**  $\delta$  7.42 – 7.39 (m, 3H), 7.37 – 7.34 (m, 3H), 7.33 – 7.29 (m, 3H), 7.17 (brs, 1H), 7.07 (t,  $J$  = 7.4 Hz, 1H), 6.96 – 6.93 (m, 4H), 3.74 (s, 2H).

---

$^{13}\text{C}$  NMR (101 MHz,  $\text{CDCl}_3$ )  $\delta$  169.2, 157.6, 153.7, 134.5, 133.2, 129.8, 129.7, 129.4, 127.8, 123.2, 121.8, 119.7, 118.5, 44.8.

**M.p.** 139.5 - 140.6 °C

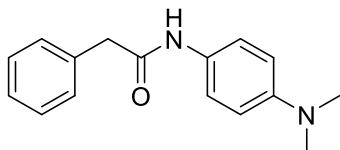

***N*-(4-(dimethylamino)phenyl)-2-phenylacetamide (3ah)**

Purified by column chromatography (silica gel, petroleum ether/ethyl acetate = 5/1 to 2/1, volume ratio) to afford the title compound as a white solid (31.8 mg, 63% yield).<sup>5</sup>

$^1\text{H}$  NMR (400 MHz,  $\text{CDCl}_3$ )  $\delta$  7.40 – 7.36 (m, 2H), 7.34 – 7.30 (m, 3H), 7.24 (d,  $J$  = 9.0 Hz, 2H), 7.02 (brs, 1H), 6.65 (d,  $J$  = 9.0 Hz, 2H), 3.70 (s, 2H), 2.89 (s, 6H).

$^{13}\text{C}$  NMR (101 MHz,  $\text{CDCl}_3$ )  $\delta$  169.0, 148.3, 134.9, 129.7, 129.3, 127.6, 127.5, 122.0, 113.1, 44.7, 41.0.

**M.p.** 40.6 - 41.7 °C

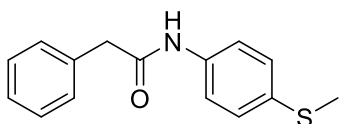

***N*-(4-(methylthio)phenyl)-2-phenylacetamide (3ai)**

Purified by column chromatography (silica gel, petroleum ether/ethyl acetate = 10/1 to 5/1, volume ratio) to afford the title compound as a white solid (38.9 mg, 76% yield).<sup>5</sup>

$^1\text{H}$  NMR (400 MHz,  $\text{CDCl}_3$ )  $\delta$  7.41 – 7.38 (m, 2H), 7.36 – 7.31 (m, 5H), 7.18 (d,  $J$  = 8.7 Hz, 3H), 3.72 (s, 2H), 2.44 (s, 3H).

$^{13}\text{C}$  NMR (101 MHz,  $\text{CDCl}_3$ )  $\delta$  169.2, 135.3, 134.5, 133.9, 129.6, 129.4, 128.0, 127.8, 120.6, 44.9, 16.8.

**M.p.** 117.8 - 119.3 °C



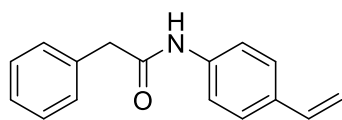

### 2-phenyl-*N*-(4-vinylphenyl)acetamide (3aj)

Purified by column chromatography (silica gel, petroleum ether/ethyl acetate = 10/1 to 5/1, volume ratio) to afford the title compound as a white solid (29.4 mg, 62% yield).

$^1\text{H NMR}$  (400 MHz,  $\text{CDCl}_3$ )  $\delta$  7.43 – 7.31 (m, 9H), 7.08 (brs, 1H), 6.64 (dd,  $J = 17.6, 10.9$  Hz, 1H), 5.66 (d,  $J = 17.6$  Hz, 1H), 5.18 (d,  $J = 11.0$  Hz, 1H), 3.74 (s, 2H).

$^{13}\text{C NMR}$  (101 MHz,  $\text{CDCl}_3$ )  $\delta$  169.1, 137.3, 136.2, 134.5, 134.0, 129.7, 129.4, 127.9, 126.9, 119.9, 113.2, 45.0.

**M.p.** 98.4 - 100.2 °C

**HRMS** (ESI)  $m/z$ :  $[\text{M}+\text{H}]^+$  Calcd. for  $\text{C}_{16}\text{H}_{15}\text{NO}$  238.1226; Found 238.1229.

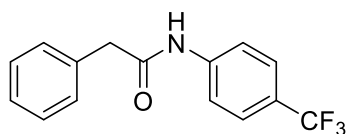

### 2-phenyl-*N*-(4-(trifluoromethyl)phenyl)acetamide (3ak)

Purified by column chromatography (silica gel, petroleum ether/ethyl acetate = 10/1 to 5/1, volume ratio) to afford the title compound as a white solid (39.6 mg, 71% yield).<sup>5</sup>

$^1\text{H NMR}$  (400 MHz,  $\text{CDCl}_3$ )  $\delta$  7.56 – 7.51 (m, 4H), 7.43 – 7.40 (m, 2H), 7.38 – 7.32 (m, 3H), 7.29 (brs, 1H), 3.76 (s, 2H).

$^{13}\text{C NMR}$  (101 MHz,  $\text{CDCl}_3$ )  $\delta$  169.5, 140.7, 134.1, 129.6, 129.5, 128.1, 126.34 (C-F, q,  $^2J_{\text{C-F}} = 32.7$  Hz), 126.33 (C-F, q,  $^3J_{\text{C-F}} = 3.6$  Hz), 124.1 (C-F, q,  $^1J_{\text{C-F}} = 271.6$  Hz), 119.5, 45.0.

$^{19}\text{F NMR}$  (377 MHz,  $\text{CDCl}_3$ )  $\delta$  -62.1.

**M.p.** 161.2 - 162.5 °C

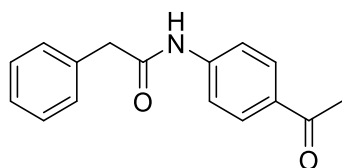

### *N*-(4-acetylphenyl)-2-phenylacetamide (3al)

Purified by column chromatography (silica gel, petroleum ether/ethyl acetate = 5/1 to 2/1, volume ratio) to afford the title compound as a white solid (29.5 mg, 58% yield).<sup>6</sup>

**<sup>1</sup>H NMR (400 MHz, CDCl<sub>3</sub>)**  $\delta$  7.89 (d,  $J$  = 8.7 Hz, 2H), 7.53 (d,  $J$  = 8.7 Hz, 2H), 7.44 – 7.40 (m, 2H), 7.38 – 7.33 (m, 3H), 7.31 (brs, 1H), 3.77 (s, 2H), 2.56 (s, 3H).

**<sup>13</sup>C NMR (101 MHz, CDCl<sub>3</sub>)**  $\delta$  197.0, 169.4, 142.0, 134.0, 133.2, 129.8, 129.7, 129.5, 128.1, 119.0, 45.1, 26.6.

**M.p.** 121.3 - 123.1 °C

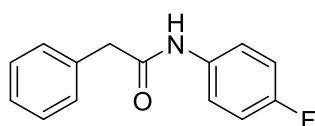

***N*-(4-fluorophenyl)-2-phenylacetamide (3am)**

Purified by column chromatography (silica gel, petroleum ether/ethyl acetate = 10/1 to 5/1, volume ratio) to afford the title compound as a white solid (33.2 mg, 73% yield).<sup>7</sup>

**<sup>1</sup>H NMR (400 MHz, CDCl<sub>3</sub>)**  $\delta$  7.42 – 7.38 (m, 3H), 7.37 – 7.32 (m, 4H), 7.14 (brs, 1H), 6.96 (t,  $J$  = 8.7 Hz, 2H), 3.73 (s, 2H).

**<sup>13</sup>C NMR (101 MHz, CDCl<sub>3</sub>)**  $\delta$  169.2, 159.6 (C-F, d,  $^1J_{C-F}$  = 243.7 Hz), 134.4, 133.7 (C-F, d,  $^4J_{C-F}$  = 2.5 Hz), 129.7, 129.4, 127.9, 121.9 (C-F, d,  $^3J_{C-F}$  = 7.9 Hz), 115.7 (C-F, d,  $^2J_{C-F}$  = 22.5 Hz), 44.8.

**<sup>19</sup>F NMR (377 MHz, CDCl<sub>3</sub>)**  $\delta$  -117.7.

**M.p.** 125.6 - 127.8 °C

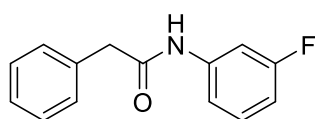

***N*-(3-fluorophenyl)-2-phenylacetamide (3an)**

Purified by column chromatography (silica gel, petroleum ether/ethyl acetate = 10/1 to 5/1, volume ratio) to afford the title compound as a white solid (33.0 mg, 72% yield).<sup>8</sup>

**<sup>1</sup>H NMR (400 MHz, CDCl<sub>3</sub>)**  $\delta$  7.43 – 7.39 (m, 3H), 7.37 – 7.32 (m, 3H), 7.24 – 7.18 (m, 1H), 7.15 (brs, 1H), 7.01 (dd,  $J$  = 8.1, 1.2 Hz, 1H), 6.78 (td,  $J$  = 8.3, 2.0 Hz, 1H), 3.74 (s, 2H).

**<sup>13</sup>C NMR (101 MHz, CDCl<sub>3</sub>)**  $\delta$  169.2, 163.1 (C-F, d,  $^1J_{C-F}$  = 244.9 Hz), 139.2 (C-F, d,  $^3J_{C-F}$  = 10.7 Hz), 134.2, 130.1 (C-F, d,  $^3J_{C-F}$  = 9.3 Hz), 129.7, 129.5, 128.0, 115.0 (C-F, d,  $^4J_{C-F}$  = 2.6 Hz), 111.3 (C-F, d,  $^2J_{C-F}$  = 21.4 Hz), 107.4 (C-F, d,  $^2J_{C-F}$  = 26.4 Hz), 45.0.

**<sup>19</sup>F NMR (377 MHz, CDCl<sub>3</sub>)**  $\delta$  -111.4.

**M.p.** 105.6 - 107.1 °C

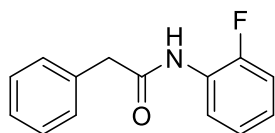

***N*-(2-fluorophenyl)-2-phenylacetamide (3ao)**

Purified by column chromatography (silica gel, petroleum ether/ethyl acetate = 10/1 to 5/1, volume ratio) to afford the title compound as a white solid (24.3 mg, 53% yield).<sup>9</sup>

**<sup>1</sup>H NMR (400 MHz, CDCl<sub>3</sub>)**  $\delta$  8.29 (t,  $J$  = 8.0 Hz, 1H), 7.43 – 7.34 (m, 6H), 7.12 – 7.08 (m, 1H), 7.03 – 7.00 (m, 2H), 3.78 (s, 2H).

**<sup>13</sup>C NMR (101 MHz, CDCl<sub>3</sub>)**  $\delta$  169.2, 152.5 (C-F, d,  $^1J_{\text{C-F}}$  = 243.2 Hz), 134.2, 129.6, 129.4, 127.9, 126.3 (C-F, d,  $^3J_{\text{C-F}}$  = 10.0 Hz), 124.7 (C-F, d,  $^4J_{\text{C-F}}$  = 3.7 Hz), 124.6 (C-F, d,  $^3J_{\text{C-F}}$  = 8.1 Hz), 121.8, 114.8 (C-F, d,  $^2J_{\text{C-F}}$  = 19.2 Hz), 45.0.

**<sup>19</sup>F NMR (377 MHz, CDCl<sub>3</sub>)**  $\delta$  -131.6.

**M.p.** 97.6 - 98.4 °C

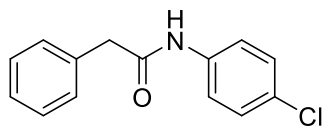

***N*-(4-chlorophenyl)-2-phenylacetamide (3ap)**

Purified by column chromatography (silica gel, petroleum ether/ethyl acetate = 10/1 to 5/1, volume ratio) to afford the title compound as a white solid (39.9 mg, 81% yield).<sup>7</sup>

**<sup>1</sup>H NMR (400 MHz, CDCl<sub>3</sub>)**  $\delta$  7.42 – 7.38 (m, 3H), 7.35 – 7.31 (m, 4H), 7.24 – 7.22 (m, 2H), 7.17 (brs, 1H), 3.73 (s, 2H).

**<sup>13</sup>C NMR (101 MHz, CDCl<sub>3</sub>)**  $\delta$  169.2, 136.3, 134.3, 129.64, 129.56, 129.4, 129.1, 127.9, 121.2, 44.9.

**M.p.** 165.6 - 167.4 °C

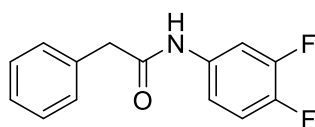

***N*-(3,4-difluorophenyl)-2-phenylacetamide (3aq)**

Purified by column chromatography (silica gel, petroleum ether/ethyl acetate = 10/1 to 5/1, volume ratio) to afford the title compound as a white solid (34.4 mg, 70% yield).

**<sup>1</sup>H NMR (400 MHz, CDCl<sub>3</sub>)**  $\delta$  7.54 (ddd,  $J = 12.1, 7.2, 2.6$  Hz, 1H), 7.43 – 7.39 (m, 2H), 7.37 – 7.31 (m, 3H), 7.12 (brs, 1H), 7.04 (dd,  $J = 18.5, 8.8$  Hz, 1H), 6.96 – 6.92 (m, 1H), 3.73 (s, 2H).

**<sup>13</sup>C NMR (101 MHz, CDCl<sub>3</sub>)**  $\delta$  169.2, 150.2 (C-F, dd,  $^1J_{C-F} = 247.3, 13.2$  Hz), 147.2 (C-F, dd,  $^1J_{C-F} = 245.6, 12.7$  Hz), 134.2 (C-F, dd,  $^3J_{C-F} = 5.9, 3.1$  Hz), 134.1, 129.6, 129.5, 128.0, 117.2 (C-F, d,  $^2J_{C-F} = 18.2$  Hz), 115.5 (C-F, dd,  $^3J_{C-F} = 5.7, 3.7$  Hz), 109.8 (C-F, d,  $^2J_{C-F} = 21.8$  Hz), 44.8.

**<sup>19</sup>F NMR (377 MHz, CDCl<sub>3</sub>)**  $\delta$  -135.6, -142.4.

**M.p.** 93.9 - 94.7 °C

**HRMS (ESI) m/z:** [M+H]<sup>+</sup> Calcd. for C<sub>14</sub>H<sub>11</sub>F<sub>2</sub>NO 248.0881; Found 248.0892.

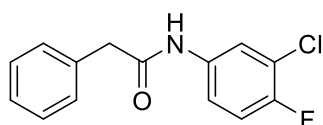

#### ***N*-(3-chloro-4-fluorophenyl)-2-phenylacetamide (3ar)**

Purified by column chromatography (silica gel, petroleum ether/ethyl acetate = 10/1 to 5/1, volume ratio) to afford the title compound as a white solid (35.8 mg, 68% yield).<sup>5</sup>

**<sup>1</sup>H NMR (400 MHz, CDCl<sub>3</sub>)**  $\delta$  7.59 (dd,  $J = 6.5, 2.6$  Hz, 1H), 7.43 – 7.39 (m, 2H), 7.37 – 7.31 (m, 3H), 7.26 – 7.20 (m, 1H), 7.15 (brs, 1H), 7.03 (t,  $J = 8.8$  Hz, 1H), 3.73 (s, 2H).

**<sup>13</sup>C NMR (101 MHz, CDCl<sub>3</sub>)**  $\delta$  169.3, 155.0 (C-F, d,  $^1J_{C-F} = 246.5$  Hz), 134.3 (C-F, d,  $^4J_{C-F} = 3.1$  Hz), 134.1, 129.6, 129.5, 128.0, 122.3, 121.2 (C-F, d,  $^2J_{C-F} = 18.5$  Hz), 119.7 (C-F, d,  $^3J_{C-F} = 6.8$  Hz), 116.7 (C-F, d,  $^2J_{C-F} = 22.1$  Hz), 44.8.

**<sup>19</sup>F NMR (377 MHz, CDCl<sub>3</sub>)**  $\delta$  -120.3.

**M.p.** 105.7 - 106.9 °C

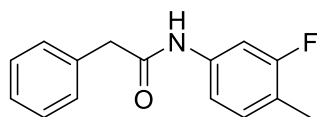

#### ***N*-(3-fluoro-4-methylphenyl)-2-phenylacetamide (3as)**

Purified by column chromatography (silica gel, petroleum ether/ethyl acetate = 10/1 to 5/1, volume ratio) to afford the title compound as a white solid (35.5 mg, 73% yield).

**<sup>1</sup>H NMR (400 MHz, CDCl<sub>3</sub>)**  $\delta$  7.42 – 7.38 (m, 2H), 7.36 – 7.31 (m, 4H), 7.13 (brs, 1H), 7.04 (t,  $J$  = 8.3 Hz, 1H), 6.92 (dd,  $J$  = 8.2, 2.0 Hz, 1H), 3.72 (s, 2H), 2.20 (d,  $J$  = 1.5 Hz, 3H).

**<sup>13</sup>C NMR (101 MHz, CDCl<sub>3</sub>)**  $\delta$  169.2, 161.2 (C-F, d,  $^1J_{\text{C-F}}$  = 244.0 Hz), 136.8 (C-F, d,  $^3J_{\text{C-F}}$  = 10.8 Hz), 134.4, 131.4 (C-F, d,  $^3J_{\text{C-F}}$  = 6.3 Hz), 129.7, 129.4, 127.9, 120.8 (C-F, d,  $^2J_{\text{C-F}}$  = 17.6 Hz), 115.0 (C-F, d,  $^4J_{\text{C-F}}$  = 3.1 Hz), 107.3 (C-F, d,  $^2J_{\text{C-F}}$  = 27.2 Hz), 44.9, 14.2 (C-F, d,  $J_{\text{C-F}}$  = 3.1 Hz).

**<sup>19</sup>F NMR (377 MHz, CDCl<sub>3</sub>)**  $\delta$  -115.4.

**M.p.** 116.9 - 118.6 °C

**HRMS (ESI)**  $m/z$ : [M+H]<sup>+</sup> Calcd. for C<sub>15</sub>H<sub>14</sub>FNO 244.1132; Found 244.1145.

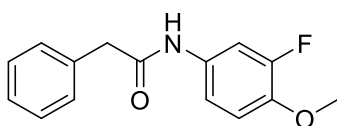

***N*-(3-fluoro-4-methoxyphenyl)-2-phenylacetamide (3at)**

Purified by column chromatography (silica gel, petroleum ether/ethyl acetate = 5/1 to 2/1, volume ratio) to afford the title compound as a white solid (36.3 mg, 70% yield).<sup>5</sup>

**<sup>1</sup>H NMR (400 MHz, CDCl<sub>3</sub>)**  $\delta$  7.42 – 7.38 (m, 2H), 7.36 – 7.32 (m, 4H), 7.03 (brs, 1H), 7.02 (d,  $J$  = 9.0 Hz, 1H), 6.84 (t,  $J$  = 9.0 Hz, 1H), 3.84 (s, 3H), 3.72 (s, 2H).

**<sup>13</sup>C NMR (101 MHz, CDCl<sub>3</sub>)**  $\delta$  169.2, 152.2 (C-F, d,  $^1J_{\text{C-F}}$  = 245.5 Hz), 144.7 (C-F, d,  $^3J_{\text{C-F}}$  = 10.8 Hz), 134.4, 131.2 (C-F, d,  $^3J_{\text{C-F}}$  = 9.0 Hz), 129.7, 129.4, 127.9, 115.8 (C-F, d,  $^4J_{\text{C-F}}$  = 3.4 Hz), 113.8 (C-F, d,  $^4J_{\text{C-F}}$  = 1.5 Hz), 109.4 (C-F, d,  $^2J_{\text{C-F}}$  = 22.6 Hz), 56.7, 44.8.

**<sup>19</sup>F NMR (377 MHz, CDCl<sub>3</sub>)**  $\delta$  -133.1.

**M.p.** 125.2 - 126.8 °C

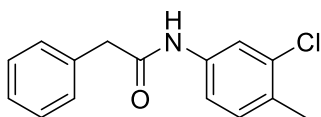

***N*-(3-chloro-4-methylphenyl)-2-phenylacetamide (3au)**

Purified by column chromatography (silica gel, petroleum ether/ethyl acetate = 10/1 to 5/1, volume ratio) to afford the title compound as a white solid (38.9 mg, 75% yield).<sup>5</sup>

**<sup>1</sup>H NMR (400 MHz, CDCl<sub>3</sub>)**  $\delta$  7.48 (d,  $J$  = 2.0 Hz, 1H), 7.42 – 7.38 (m, 2H), 7.36 – 7.31 (m, 3H), 7.19 (dd,  $J$  = 8.3, 2.1 Hz, 1H), 7.14 (brs, 1H), 7.10 (d,  $J$  = 8.3 Hz, 1H), 3.72 (s, 2H), 2.30 (s, 3H).

<sup>13</sup>C NMR (101 MHz, CDCl<sub>3</sub>) δ 169.2, 136.5, 134.5, 134.4, 132.2, 131.0, 129.6, 129.4, 127.9, 120.6, 118.3, 44.9, 19.6.

**M.p.** 123.7 - 124.9 °C

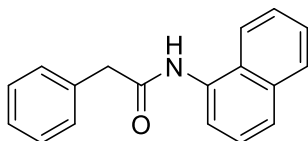

***N*-(naphthalen-1-yl)-2-phenylacetamide (3av)**

Purified by column chromatography (silica gel, petroleum ether/ethyl acetate = 10/1 to 5/1, volume ratio) to afford the title compound as a white solid (21.9 mg, 42% yield).<sup>5</sup>

<sup>1</sup>H NMR (400 MHz, CDCl<sub>3</sub>) δ 7.97 (d, *J* = 7.5 Hz, 1H), 7.82 (d, *J* = 8.0 Hz, 1H), 7.66 (d, *J* = 8.2 Hz, 1H), 7.49 – 7.38 (m, 9H), 7.29 (d, *J* = 8.3 Hz, 1H), 3.90 (s, 2H).

<sup>13</sup>C NMR (101 MHz, CDCl<sub>3</sub>) δ 169.6, 134.8, 134.2, 132.1, 129.9, 129.7, 128.9, 128.1, 126.9, 126.4, 126.0, 125.88, 125.85, 120.4, 120.1, 45.1.

**M.p.** 150.8 - 152.1 °C

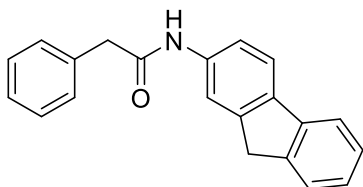

***N*-(9*H*-fluoren-2-yl)-2-phenylacetamide (3aw)**

Purified by column chromatography (silica gel, petroleum ether/ethyl acetate = 10/1 to 5/1, volume ratio) to afford the title compound as a light yellow solid (43.1 mg, 72% yield).

<sup>1</sup>H NMR (400 MHz, CDCl<sub>3</sub>) δ 7.79 (s, 1H), 7.70 (d, *J* = 7.5 Hz, 1H), 7.66 (d, *J* = 8.2 Hz, 1H), 7.51 (d, *J* = 7.4 Hz, 1H), 7.44 – 7.40 (m, 2H), 7.37 – 7.31 (m, 4H), 7.28 – 7.24 (m, 2H), 7.16 (brs, 1H), 3.85 (s, 2H), 3.78 (s, 2H).

<sup>13</sup>C NMR (101 MHz, CDCl<sub>3</sub>) δ 169.1, 144.4, 143.3, 141.4, 138.4, 136.6, 134.6, 129.7, 129.4, 127.9, 126.9, 126.5, 125.1, 120.2, 119.7, 118.7, 117.0, 45.1, 37.1.

**M.p.** 190.0 - 191.2 °C

**HRMS** (ESI) *m/z*: [M+H]<sup>+</sup> Calcd. for C<sub>21</sub>H<sub>17</sub>NO 300.1383; Found 300.1389.

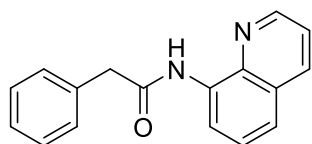

### 2-phenyl-*N*-(quinolin-8-yl)acetamide (3ax)

Purified by column chromatography (silica gel, petroleum ether/ethyl acetate = 10/1 to 5/1, volume ratio) to afford the title compound as a colorless oil (28.8 mg, 55% yield).<sup>10</sup>

<sup>1</sup>H NMR (400 MHz, CDCl<sub>3</sub>) δ 9.91 (brs, 1H), 8.76 (dd, *J* = 7.2, 1.7 Hz, 1H), 8.70 (dd, *J* = 4.2, 1.6 Hz, 1H), 8.12 (dd, *J* = 8.3, 1.6 Hz, 1H), 7.53 – 7.47 (m, 2H), 7.46 – 7.39 (m, 5H), 7.34 (dt, *J* = 9.5, 4.2 Hz, 1H), 3.90 (s, 2H).

<sup>13</sup>C NMR (101 MHz, CDCl<sub>3</sub>) δ 169.6, 148.3, 138.6, 136.4, 134.8, 134.5, 129.7, 129.1, 128.0, 127.5, 121.72, 121.67, 116.5, 45.5.

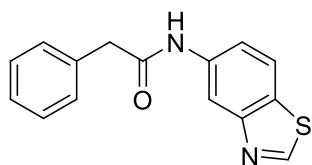

### *N*-(benzo[*d*]thiazol-5-yl)-2-phenylacetamide (3ay)

Purified by column chromatography (silica gel, petroleum ether/ethyl acetate = 5/1 to 1/1, volume ratio) to afford the title compound as a light yellow solid (31.1 mg, 58% yield).

<sup>1</sup>H NMR (400 MHz, CDCl<sub>3</sub>) δ 8.98 (s, 1H), 8.19 (d, *J* = 1.8 Hz, 1H), 7.84 (d, *J* = 8.7 Hz, 1H), 7.57 (dd, *J* = 8.7, 1.8 Hz, 1H), 7.44 – 7.41 (m, 2H), 7.38 – 7.34 (m, 3H), 7.32 (brs, 1H), 3.80 (s, 2H).

<sup>13</sup>C NMR (101 MHz, CDCl<sub>3</sub>) δ 169.4, 155.3, 153.9, 136.5, 134.4, 129.7, 129.6, 129.5, 128.0, 122.1, 119.0, 114.5, 45.0.

**M.p.** 97.6 - 99.3 °C

**HRMS** (ESI) *m/z*: [M+H]<sup>+</sup> Calcd. for C<sub>15</sub>H<sub>12</sub>N<sub>2</sub>OS 269.0743; Found 269.0751.

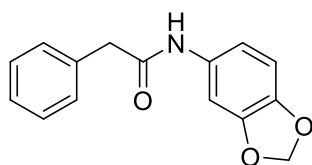

### *N*-(benzo[*d*][1,3]dioxol-5-yl)-2-phenylacetamide (3az)

Purified by column chromatography (silica gel, petroleum ether/ethyl acetate = 5/1 to 2/1, volume ratio) to afford the title compound as a white solid (39.8 mg, 78% yield).

**<sup>1</sup>H NMR (400 MHz, CDCl<sub>3</sub>)** δ 7.42 – 7.38 (m, 2H), 7.35 – 7.30 (m, 3H), 7.15 (d, *J* = 1.9 Hz, 1H), 7.02 (brs, 1H), 6.70 – 6.63 (m, 2H), 5.92 (s, 2H), 3.71 (s, 2H).

**<sup>13</sup>C NMR (101 MHz, CDCl<sub>3</sub>)** δ 169.2, 147.9, 144.6, 134.6, 131.9, 129.7, 129.4, 127.8, 113.3, 108.1, 103.0, 101.4, 44.8.

**M.p.** 144.6 - 146.2 °C

**HRMS (ESI)** *m/z*: [M+H]<sup>+</sup> Calcd. for C<sub>15</sub>H<sub>13</sub>NO<sub>3</sub> 256.0968; Found 256.0977.

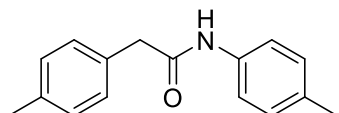

***N*,2-di-*p*-tolylacetamide (3bb)**

Purified by column chromatography (silica gel, petroleum ether/ethyl acetate = 10/1 to 5/1, volume ratio) to afford the title compound as a white solid (37.3 mg, 78% yield).<sup>5</sup>

**<sup>1</sup>H NMR (400 MHz, CDCl<sub>3</sub>)** δ 7.28 (d, *J* = 8.4 Hz, 2H), 7.23 – 7.19 (m, 4H), 7.07 (d, *J* = 8.3 Hz, 2H), 7.03 (brs, 1H), 3.69 (s, 2H), 2.37 (s, 3H), 2.29 (s, 3H).

**<sup>13</sup>C NMR (101 MHz, CDCl<sub>3</sub>)** δ 169.3, 137.5, 135.2, 134.2, 131.5, 130.1, 129.6, 129.5, 120.0, 44.6, 21.3, 21.0.

**M.p.** 151.8 - 153.5 °C

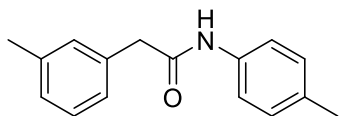

**2-(*m*-tolyl)-*N*-(*p*-tolyl)acetamide (3cb)**

Purified by column chromatography (silica gel, petroleum ether/ethyl acetate = 10/1 to 5/1, volume ratio) to afford the title compound as a white solid (35.8 mg, 75% yield).<sup>5</sup>

**<sup>1</sup>H NMR (400 MHz, CDCl<sub>3</sub>)** δ 7.28 (t, *J* = 7.9 Hz, 3H), 7.15 – 7.12 (m, 3H), 7.08 (d, *J* = 8.2 Hz, 3H), 3.69 (s, 2H), 2.37 (s, 3H), 2.29 (s, 3H).

**<sup>13</sup>C NMR (101 MHz, CDCl<sub>3</sub>)** δ 169.2, 139.1, 135.2, 134.6, 134.2, 130.4, 129.5, 129.2, 128.5, 126.7, 120.0, 44.9, 21.5, 21.0.

**M.p.** 104.1 - 105.9 °C

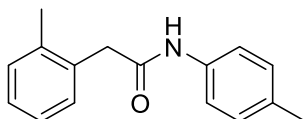



### 2-(*o*-tolyl)-*N*-(*p*-tolyl)acetamide (3db)

Purified by column chromatography (silica gel, petroleum ether/ethyl acetate = 10/1 to 5/1, volume ratio) to afford the title compound as a white solid (31.9 mg, 67% yield).<sup>5</sup>

<sup>1</sup>H NMR (400 MHz, CDCl<sub>3</sub>)  $\delta$  7.27 – 7.24 (m, 6H), 7.07 (d,  $J$  = 8.3 Hz, 2H), 6.93 (brs, 1H), 3.73 (s, 2H), 2.33 (s, 3H), 2.28 (s, 3H).

<sup>13</sup>C NMR (101 MHz, CDCl<sub>3</sub>)  $\delta$  168.9, 137.6, 135.1, 134.3, 133.2, 131.1, 130.7, 129.5, 128.3, 127.0, 120.1, 43.0, 21.0, 19.7.

M.p. 146.7 - 148.3 °C

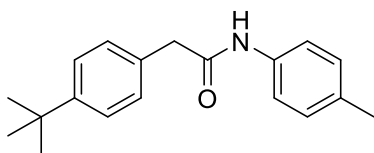

### 2-(4-(*tert*-butyl)phenyl)-*N*-(*p*-tolyl)acetamide (3eb)

Purified by column chromatography (silica gel, petroleum ether/ethyl acetate = 10/1 to 5/1, volume ratio) to afford the title compound as a white solid (36.7mg, 65% yield).

<sup>1</sup>H NMR (400 MHz, CDCl<sub>3</sub>)  $\delta$  7.41 (d,  $J$  = 8.2 Hz, 2H), 7.31 – 7.25 (m, 4H), 7.11 (brs, 1H), 7.08 (d,  $J$  = 8.3 Hz, 2H), 3.69 (s, 2H), 2.29 (s, 3H), 1.34 (s, 9H).

<sup>13</sup>C NMR (101 MHz, CDCl<sub>3</sub>)  $\delta$  169.4, 150.7, 135.2, 134.2, 131.6, 129.5, 129.4, 126.3, 120.1, 44.4, 34.7, 31.5, 21.0.

M.p. 112.8 - 113.9 °C

HRMS (ESI)  $m/z$ : [M+H]<sup>+</sup> Calcd. for C<sub>19</sub>H<sub>23</sub>NO 282.1852; Found 282.1865.

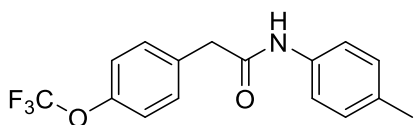

### *N*-(*p*-tolyl)-2-(4-(trifluoromethoxy)phenyl)acetamide (3fb)

Purified by column chromatography (silica gel, petroleum ether/ethyl acetate = 10/1 to 5/1, volume ratio) to afford the title compound as a white solid (46.5 mg, 75% yield).

<sup>1</sup>H NMR (400 MHz, CDCl<sub>3</sub>)  $\delta$  7.37 (d,  $J$  = 8.6 Hz, 2H), 7.32 (d,  $J$  = 8.4 Hz, 2H), 7.23 (d,  $J$  = 8.1 Hz, 2H), 7.09 (d,  $J$  = 8.2 Hz, 3H), 3.71 (s, 2H), 2.30 (s, 3H).

**<sup>13</sup>C NMR (101 MHz, CDCl<sub>3</sub>)**  $\delta$  168.4, 148.8, 135.0, 134.5, 133.4, 131.0, 129.6, 121.7, 120.6 (C-F, q, <sup>1</sup>J<sub>C-F</sub> = 257.4 Hz), 120.1, 44.0, 21.0.

**<sup>19</sup>F NMR (377 MHz, CDCl<sub>3</sub>)**  $\delta$  -57.8.

**M.p.** 150.7 - 152.1 °C

**HRMS (ESI) m/z:** [M+H]<sup>+</sup> Calcd. for C<sub>16</sub>H<sub>14</sub>F<sub>3</sub>NO<sub>2</sub> 310.1049; Found 310.1062.

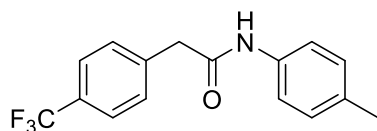

***N*-(*p*-tolyl)-2-(4-(trifluoromethyl)phenyl)acetamide (3gb)**

Purified by column chromatography (silica gel, petroleum ether/ethyl acetate = 10/1 to 5/1, volume ratio) to afford the title compound as a white solid (45.1 mg, 77% yield).<sup>5</sup>

**<sup>1</sup>H NMR (400 MHz, DMSO-*d*<sub>6</sub>)**  $\delta$  10.15 (s, 1H), 7.69 (d, *J* = 8.1 Hz, 2H), 7.55 (d, *J* = 8.0 Hz, 2H), 7.47 (d, *J* = 8.4 Hz, 2H), 7.09 (d, *J* = 8.3 Hz, 2H), 3.75 (s, 2H), 2.23 (s, 3H).

**<sup>13</sup>C NMR (101 MHz, DMSO-*d*<sub>6</sub>)**  $\delta$  168.1, 140.9, 136.6, 132.3, 130.0, 129.1, 127.3 (C-F, q, <sup>2</sup>J<sub>C-F</sub> = 31.7 Hz), 125.1 (C-F, q, <sup>3</sup>J<sub>C-F</sub> = 3.7 Hz), 124.4 (C-F, q, <sup>1</sup>J<sub>C-F</sub> = 271.9 Hz), 119.2, 42.9, 20.4.

**<sup>19</sup>F NMR (377 MHz, DMSO-*d*<sub>6</sub>)**  $\delta$  -60.8.

**M.p.** 185.1 - 186.7 °C

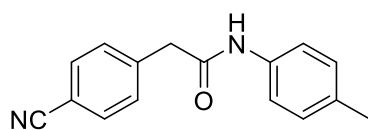

**2-(4-cyanophenyl)-*N*-(*p*-tolyl)acetamide (3hb)**

Purified by column chromatography (silica gel, petroleum ether/ethyl acetate = 5/1 to 2/1, volume ratio) to afford the title compound as a white solid (41.6 mg, 83% yield).

**<sup>1</sup>H NMR (400 MHz, DMSO-*d*<sub>6</sub>)**  $\delta$  10.14 (s, 1H), 7.79 (d, *J* = 8.2 Hz, 2H), 7.52 (d, *J* = 8.2 Hz, 2H), 7.46 (d, *J* = 8.4 Hz, 2H), 7.09 (d, *J* = 8.3 Hz, 2H), 3.74 (s, 2H), 2.23 (s, 3H).

**<sup>13</sup>C NMR (101 MHz, DMSO-*d*<sub>6</sub>)**  $\delta$  167.8, 141.9, 136.5, 132.3, 132.2, 130.3, 129.1, 119.2, 118.9, 109.4, 43.1, 20.4.

**M.p.** 205.2 - 207.1 °C

**HRMS (ESI) m/z:** [M+H]<sup>+</sup> Calcd. for C<sub>16</sub>H<sub>14</sub>N<sub>2</sub>O 251.1179; Found 251.1192.

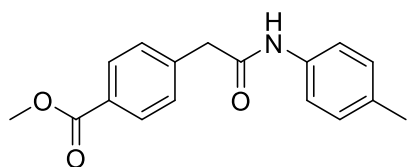

**methyl 4-(2-oxo-2-(*p*-tolylamino)ethyl)benzoate (3ib)**

Purified by column chromatography (silica gel, petroleum ether/ethyl acetate = 5/1 to 2/1, volume ratio) to afford the title compound as a white solid (45.2 mg, 80% yield).<sup>11</sup>

**<sup>1</sup>H NMR (400 MHz, CDCl<sub>3</sub>)**  $\delta$  8.04 (d,  $J$  = 8.2 Hz, 2H), 7.41 (d,  $J$  = 8.2 Hz, 2H), 7.30 (d,  $J$  = 8.4 Hz, 2H), 7.17 (brs, 1H), 7.08 (d,  $J$  = 8.3 Hz, 2H), 3.92 (s, 3H), 3.75 (s, 2H), 2.29 (s, 3H).

**<sup>13</sup>C NMR (101 MHz, CDCl<sub>3</sub>)**  $\delta$  168.1, 166.9, 139.8, 135.0, 134.5, 130.4, 129.62, 129.60, 129.5, 120.1, 52.3, 44.7, 21.0.

**M.p.** 159.3 - 160.8 °C

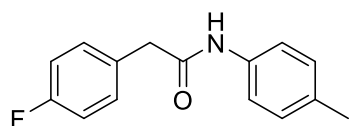

**2-(4-fluorophenyl)-*N*-(*p*-tolyl)acetamide (3jb)**

Purified by column chromatography (silica gel, petroleum ether/ethyl acetate = 10/1 to 5/1, volume ratio) to afford the title compound as a white solid (32.2 mg, 66% yield).<sup>5</sup>

**<sup>1</sup>H NMR (400 MHz, CDCl<sub>3</sub>)**  $\delta$  7.30 (dd,  $J$  = 8.5, 3.1 Hz, 4H), 7.09 (d,  $J$  = 8.5 Hz, 4H), 7.06 (brs, 1H), 3.69 (s, 2H), 2.29 (s, 3H).

**<sup>13</sup>C NMR (101 MHz, CDCl<sub>3</sub>)**  $\delta$  168.8, 162.4 (C-F, d,  $^1J_{C-F}$  = 246.5 Hz), 135.1, 134.4, 131.2 (C-F, d,  $^3J_{C-F}$  = 8.0 Hz), 130.4 (C-F, d,  $^4J_{C-F}$  = 3.2 Hz), 129.6, 120.1, 116.2 (C-F, d,  $^2J_{C-F}$  = 21.4 Hz), 44.0, 21.0.

**<sup>19</sup>F NMR (377 MHz, CDCl<sub>3</sub>)**  $\delta$  -114.7.

**M.p.** 146.6 - 148.3 °C

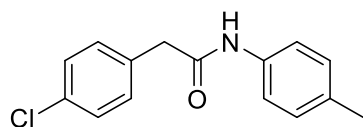

**2-(4-chlorophenyl)-*N*-(*p*-tolyl)acetamide (3kb)**

Purified by column chromatography (silica gel, petroleum ether/ethyl acetate = 10/1 to 5/1, volume ratio) to afford the title compound as a white solid (31.7 mg, 61% yield).<sup>5</sup>

**<sup>1</sup>H NMR (400 MHz, CDCl<sub>3</sub>)**  $\delta$  7.36 (d,  $J$  = 8.3 Hz, 2H), 7.31 – 7.26 (m, 4H), 7.09 (d,  $J$  = 8.2 Hz, 2H), 7.03 (brs, 1H), 3.68 (s, 2H), 2.29 (s, 3H).

**<sup>13</sup>C NMR (101 MHz, CDCl<sub>3</sub>)**  $\delta$  168.5, 135.0, 134.5, 133.7, 133.1, 131.0, 129.6, 129.4, 120.1, 44.1, 21.0.

**M.p.** 185.8 - 187.1 °C

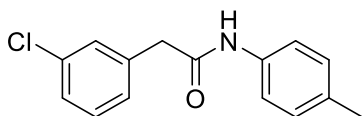

**2-(3-chlorophenyl)-N-(p-tolyl)acetamide (3lb)**

Purified by column chromatography (silica gel, petroleum ether/ethyl acetate = 10/1 to 5/1, volume ratio) to afford the title compound as a white solid (44.0 mg, 85% yield).

**<sup>1</sup>H NMR (400 MHz, CDCl<sub>3</sub>)**  $\delta$  7.32 – 7.29 (m, 5H), 7.26 – 7.20 (m, 2H), 7.08 (d,  $J$  = 8.0 Hz, 2H), 3.65 (s, 2H), 2.29 (s, 3H).

**<sup>13</sup>C NMR (101 MHz, CDCl<sub>3</sub>)**  $\delta$  168.4, 136.6, 135.0, 134.9, 134.5, 130.4, 129.7, 129.6, 127.9, 127.7, 120.2, 44.3, 21.0.

**M.p.** 110.9 - 113.4 °C

**HRMS (ESI) m/z:** [M+H]<sup>+</sup> Calcd. for C<sub>15</sub>H<sub>14</sub>ClNO 260.0837; Found 260.0849.

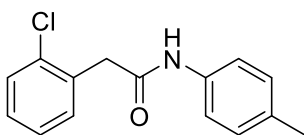

**2-(2-chlorophenyl)-N-(p-tolyl)acetamide (3mb)**

Purified by column chromatography (silica gel, petroleum ether/ethyl acetate = 10/1 to 5/1, volume ratio) to afford the title compound as a white solid (37.9 mg, 73% yield).<sup>12</sup>

**<sup>1</sup>H NMR (400 MHz, CDCl<sub>3</sub>)**  $\delta$  7.45 – 7.40 (m, 2H), 7.32 (d,  $J$  = 8.4 Hz, 2H), 7.29 – 7.27 (m, 2H), 7.21 (brs, 1H), 7.09 (d,  $J$  = 8.2 Hz, 2H), 3.83 (s, 2H), 2.29 (s, 3H).

**<sup>13</sup>C NMR (101 MHz, CDCl<sub>3</sub>)**  $\delta$  167.8, 135.2, 134.5, 134.3, 132.9, 131.9, 130.0, 129.6, 129.3, 127.6, 120.2, 42.6, 21.0.

**M.p.** 160.8 - 162.2 °C

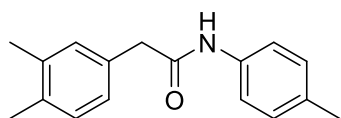

### 2-(3,4-dimethylphenyl)-N-(p-tolyl)acetamide (3nb)

Purified by column chromatography (silica gel, petroleum ether/ethyl acetate = 10/1 to 5/1, volume ratio) to afford the title compound as a white solid (33.9 mg, 67% yield).

$^1\text{H NMR}$  (400 MHz,  $\text{CDCl}_3$ )  $\delta$  7.29 (d,  $J = 8.1$  Hz, 2H), 7.15 (d,  $J = 7.7$  Hz, 1H), 7.08 – 7.04 (m, 5H), 3.66 (s, 2H), 2.29 (s, 3H), 2.27 (s, 6H).

$^{13}\text{C NMR}$  (101 MHz,  $\text{CDCl}_3$ )  $\delta$  169.5, 137.7, 136.2, 135.2, 134.1, 131.9, 131.0, 130.6, 129.5, 127.0, 120.0, 44.6, 21.0, 19.9, 19.6.

**M.p.** 121.2 - 122.8 °C

**HRMS** (ESI)  $m/z$ :  $[\text{M}+\text{H}]^+$  Calcd. for  $\text{C}_{17}\text{H}_{19}\text{NO}$  254.1539; Found 254.1552.

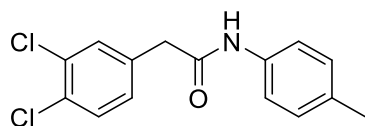

### 2-(3,4-dichlorophenyl)-N-(p-tolyl)acetamide (3ob)

Purified by column chromatography (silica gel, petroleum ether/ethyl acetate = 10/1 to 5/1, volume ratio) to afford the title compound as a white solid (48.2 mg, 82% yield).

$^1\text{H NMR}$  (400 MHz,  $\text{CDCl}_3$ )  $\delta$  7.44 – 7.42 (m, 2H), 7.32 (d,  $J = 8.4$  Hz, 2H), 7.19 – 7.16 (m, 2H), 7.10 (d,  $J = 8.2$  Hz, 2H), 3.64 (s, 2H), 2.30 (s, 3H).

$^{13}\text{C NMR}$  (101 MHz,  $\text{CDCl}_3$ )  $\delta$  167.9, 134.9, 134.7, 134.6, 133.1, 131.9, 131.5, 131.0, 129.7, 128.9, 120.2, 43.6, 21.0.

**M.p.** 148.2 - 150.4 °C

**HRMS** (ESI)  $m/z$ :  $[\text{M}+\text{H}]^+$  Calcd. for  $\text{C}_{15}\text{H}_{13}\text{Cl}_2\text{NO}$  294.0447; Found 294.0457.

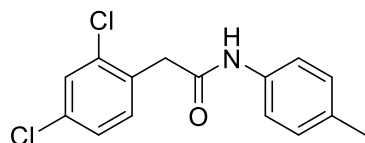

### 2-(2,4-dichlorophenyl)-N-(p-tolyl)acetamide (3pb)

Purified by column chromatography (silica gel, petroleum ether/ethyl acetate = 10/1 to 5/1, volume ratio) to afford the title compound as a white solid (41.1 mg, 70% yield).

---

**<sup>1</sup>H NMR (400 MHz, CDCl<sub>3</sub>)**  $\delta$  7.44 (d,  $J$  = 2.0 Hz, 1H), 7.35 – 7.31 (m, 3H), 7.27 – 7.24 (m, 2H), 7.09 (d,  $J$  = 8.2 Hz, 2H), 3.77 (s, 2H), 2.29 (s, 3H).

**<sup>13</sup>C NMR (101 MHz, CDCl<sub>3</sub>)**  $\delta$  167.3, 135.1, 135.0, 134.5, 134.3, 132.6, 131.5, 129.7, 129.6, 127.9, 120.3, 41.8, 21.0.

**M.p.** 159.5 - 161.3 °C

**HRMS (ESI)**  $m/z$ : [M+H]<sup>+</sup> Calcd. for C<sub>15</sub>H<sub>13</sub>Cl<sub>2</sub>NO 294.0447; Found 294.0453.

---

## 5. References

- (1) Bag, S.; Jayarajan, R.; Mondal, R.; Maiti, D. Template-Assisted *meta*-C-H Alkylation and Alkenylation of Arenes. *Angew. Chem. Int. Ed.* **2017**, *56*, 3182-3186.
- (2) Bao, Z.-P.; Miao, R.-G.; Qi, X.; Wu, X.-F. A Novel Construction of Acetamides from Rhodium-Catalyzed Aminocarbonylation of DMC with Nitro Compounds. *Chem. Commun.* **2021**, *57*, 1955-1958.
- (3) Hoque, M. E.; Hassan, M. M. M.; Chattopadhyay, B. Remarkably Efficient Iridium Catalysts for Directed C(sp<sup>2</sup>)-H and C(sp<sup>3</sup>)-H Borylation of Diverse Classes of Substrates. *J. Am. Chem. Soc.* **2021**, *143*, 5022-5037.
- (4) Kerr, W. J.; Knox, G. J.; Reid, M.; Tuttle, T.; Bergare, J.; Bragg, R. A. Computationally-Guided Development of a Chelated NHC-P Iridium(I) Complex for the Directed Hydrogen Isotope Exchange of Aryl Sulfones. *ACS Catal.* **2020**, *10*, 11120-11126.
- (5) Yang, L.-M.; Li, S.-S.; Zhang, Y.-Y.; Lu, J.-L.; Deng, J.-T.; Ma, A.-J.; Zhang, X.-Z.; Zhang, S.-Y.; Peng, J.-B. Palladium Catalyzed Aminocarbonylation of Benzylic Ammonium Triflates with Nitroarenes: Synthesis of Phenylacetamides. *Adv. Synth. Catal.* **2021**, *363*, 2061-2065.
- (6) Zhiryakova, D.; Guncheva, M.; Ivanov, I.; Stambolieva, N. Hydrolysis of Phenylacetanilides Catalyzed by Penicillin G Acylase from *Alcaligenes faecalis*: Sensitivity of the Reaction to Substitution in the Leaving Group. *Catal. Commun.* **2009**, *11*, 196-201.
- (7) Yu, W.; Yang, S.; Xiong, F.; Fan, T.; Feng, Y.; Huang, Y.; Fu, J.; Wang, T. Palladium-Catalyzed Carbonylation of Benzylic Ammonium Salts to Amides and Esters *via* C-N Bond Activation. *Org. Biomol. Chem.* **2018**, *16*, 3099-3103.
- (8) Liu, H.; Laurency, G.; Yan, N.; Dyson, P. J. Amide Bond Formation *via* C(sp<sup>3</sup>)-H Bond Functionalization and CO Insertion. *Chem. Commun.* **2014**, *50*, 341-343.
- (9) Rathore, V.; Sattar, M.; Kumar, R.; Kumar, S. Synthesis of Unsymmetrical Diaryl Acetamides, Benzofurans, Benzophenones, and Xanthenes by Transition-Metal-Free Oxidative Cross-Coupling of sp<sup>3</sup> and sp<sup>2</sup> C-H Bonds. *J. Org. Chem.* **2016**, *81*, 9206-9218.

- 
- (10) Rao, W.-H.; Zhan, B.-B.; Chen, K.; Ling, P.-X.; Zhang, Z.-Z.; Shi, B.-F. Pd(II)-Catalyzed Direct Sulfonylation of Unactivated C(sp<sup>3</sup>)-H Bonds with Sodium Sulfinates. *Org. Lett.* **2015**, *17*, 3552-3555.
- (11) Cheung, C. W.; Ploeger, M. L.; Hu, X. Direct Amidation of Esters with Nitroarenes. *Nat. Commun.* **2017**, *8*, 14878-14888.
- (12) Li, J.-S.; Chen, G.-Q.; Yang, Q.; Li, Z.-W.; Liu, C.-Z.; Huang, P.-M. Copper Powder-Catalyzed Chelation-Assisted Cascade Reaction of *o*-Chloroarylacetic Acids with Amines under Solvent- and Ligand-Free Conditions: Synthesis of Oxindoles. *RSC Adv.* **2017**, *7*, 45227-45231.



## 6. Copies of NMR Spectra

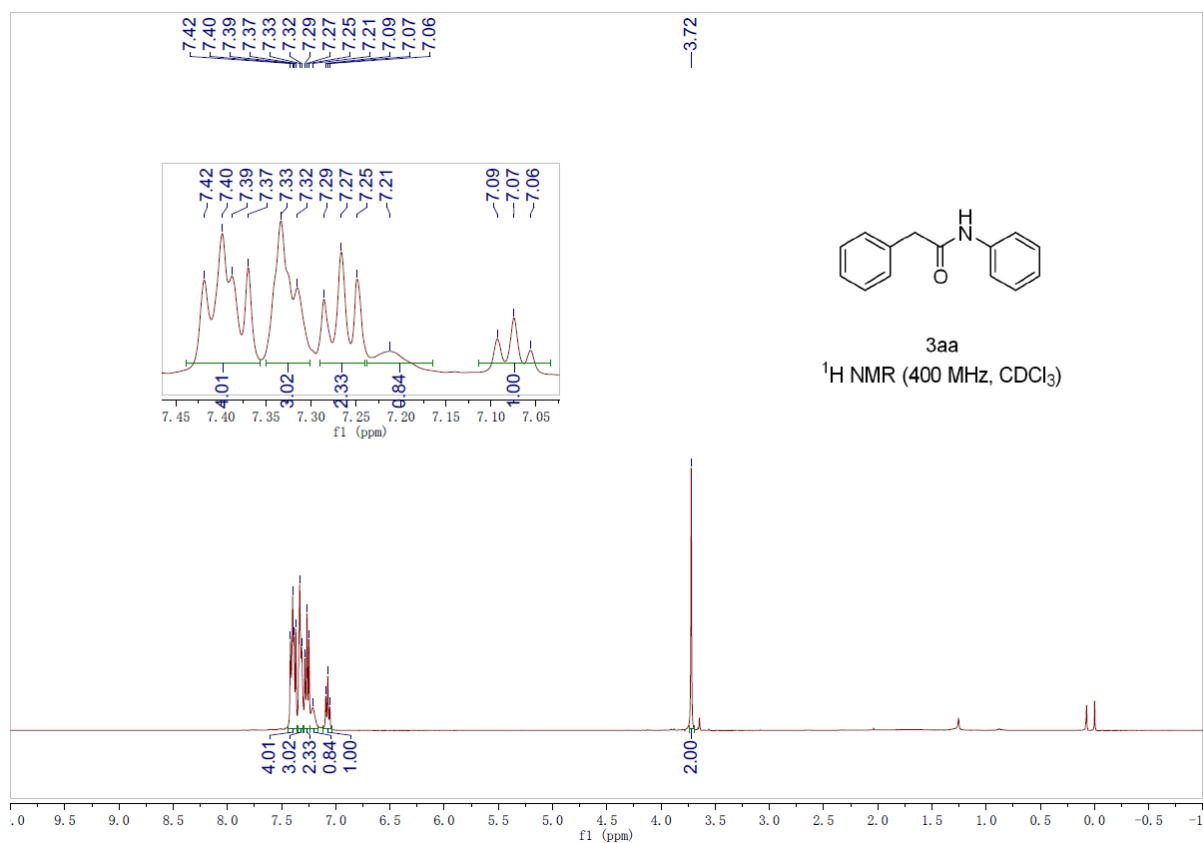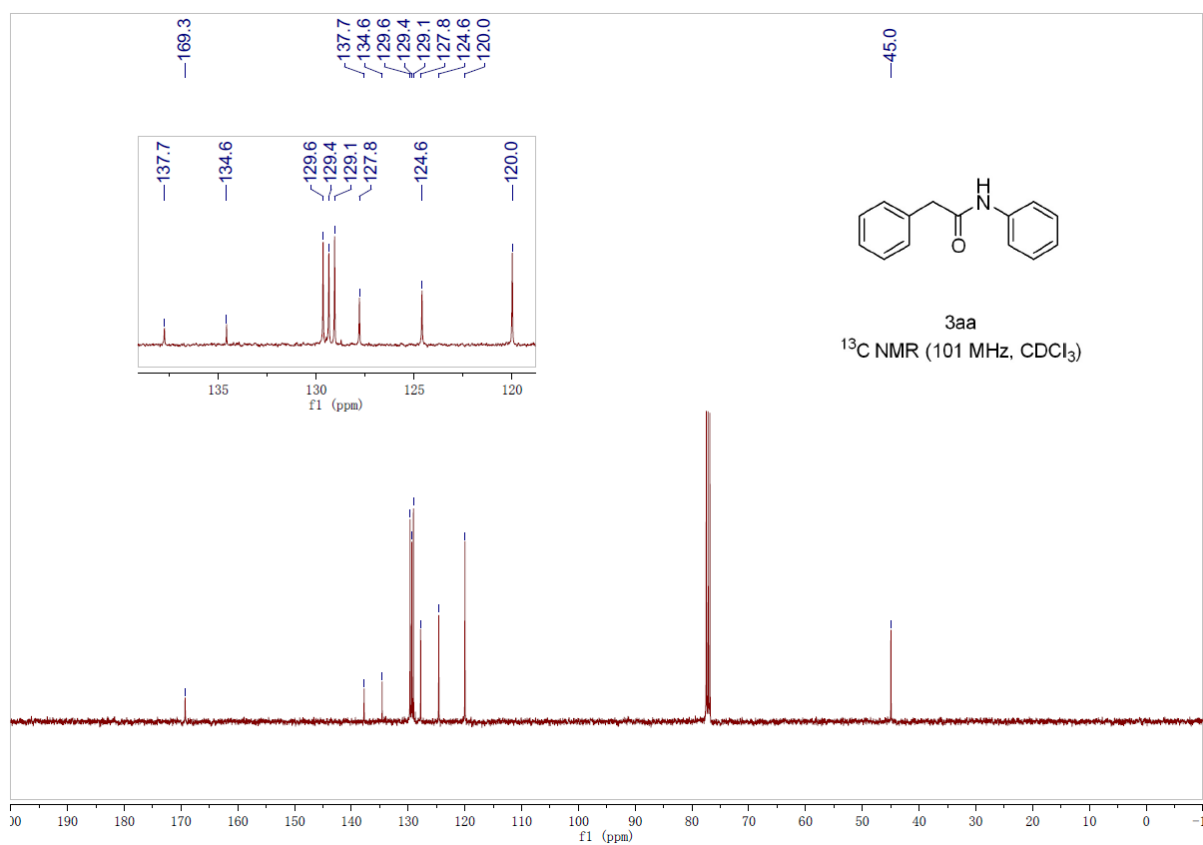

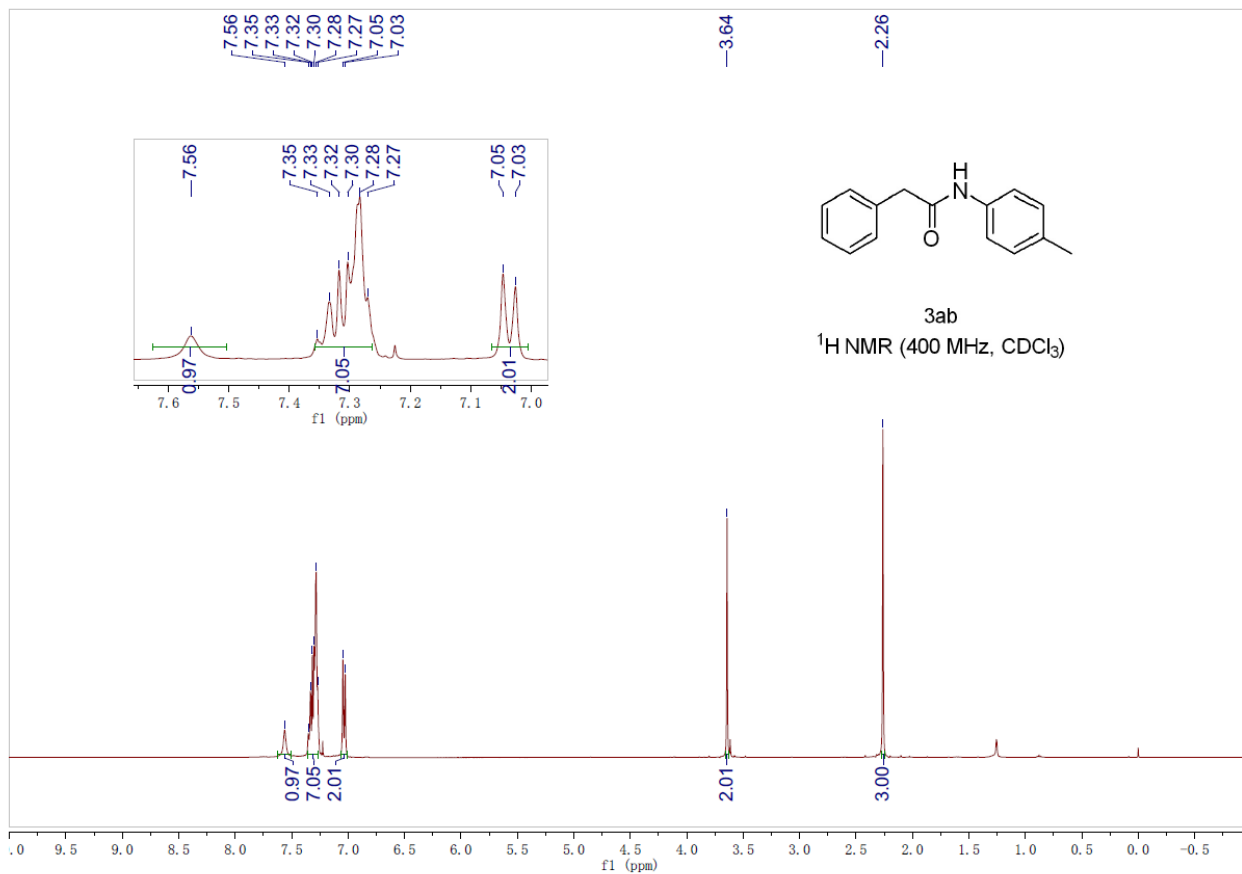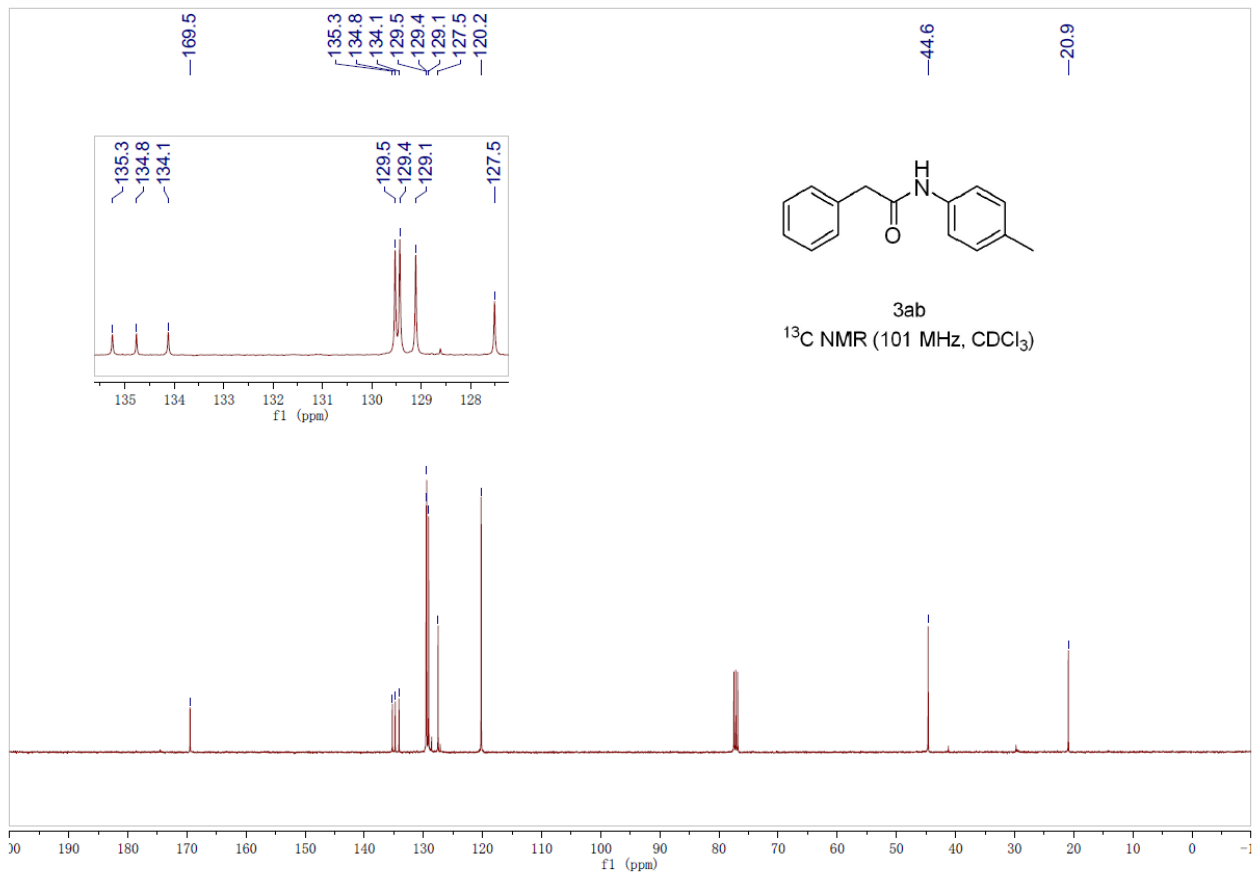

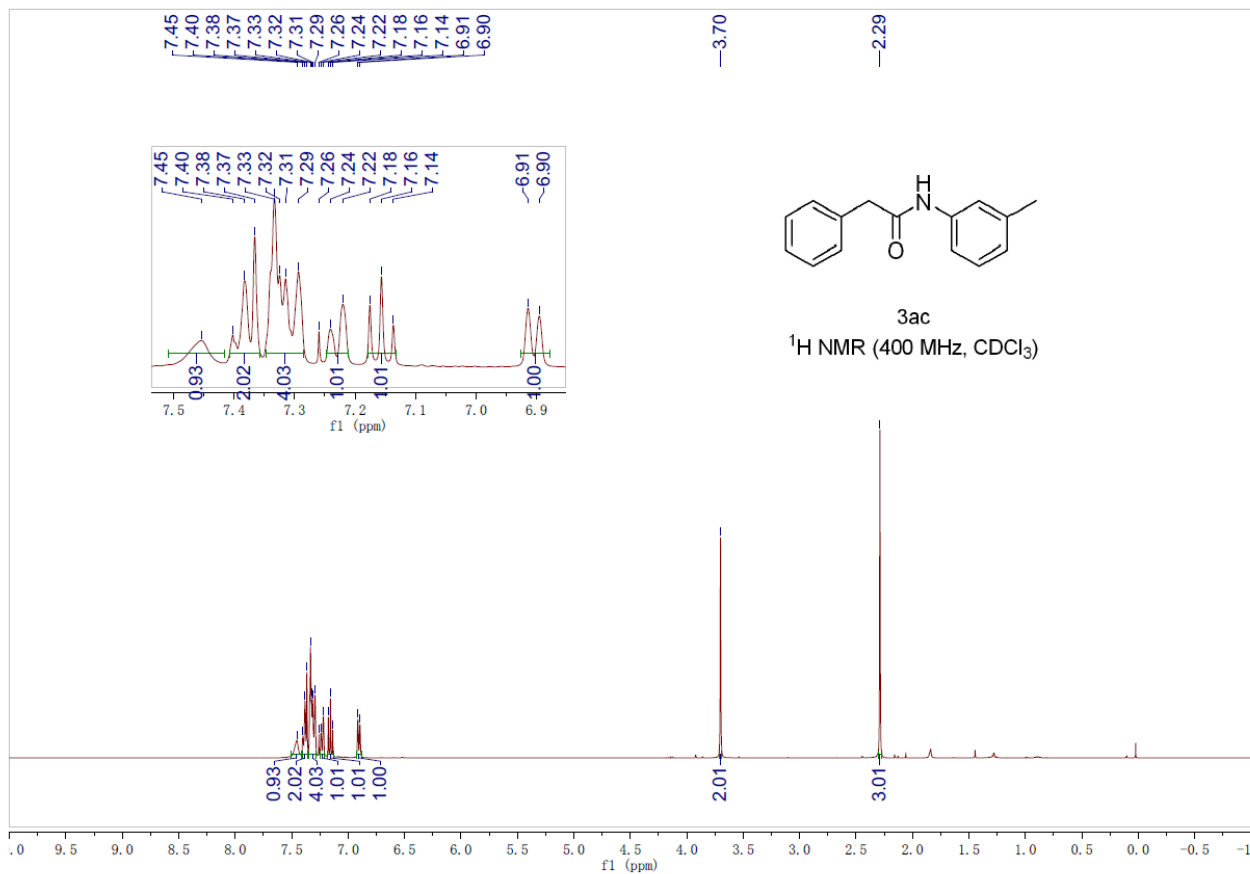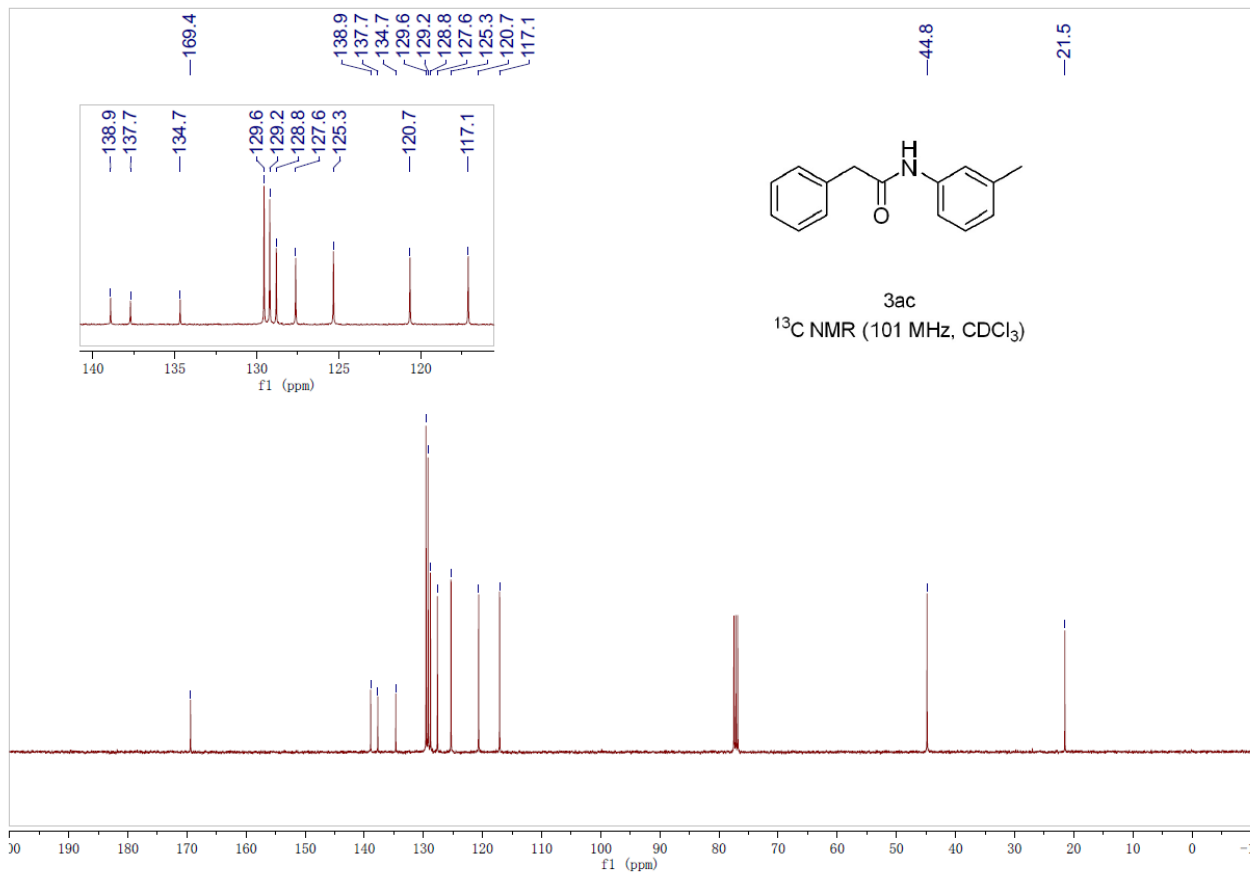

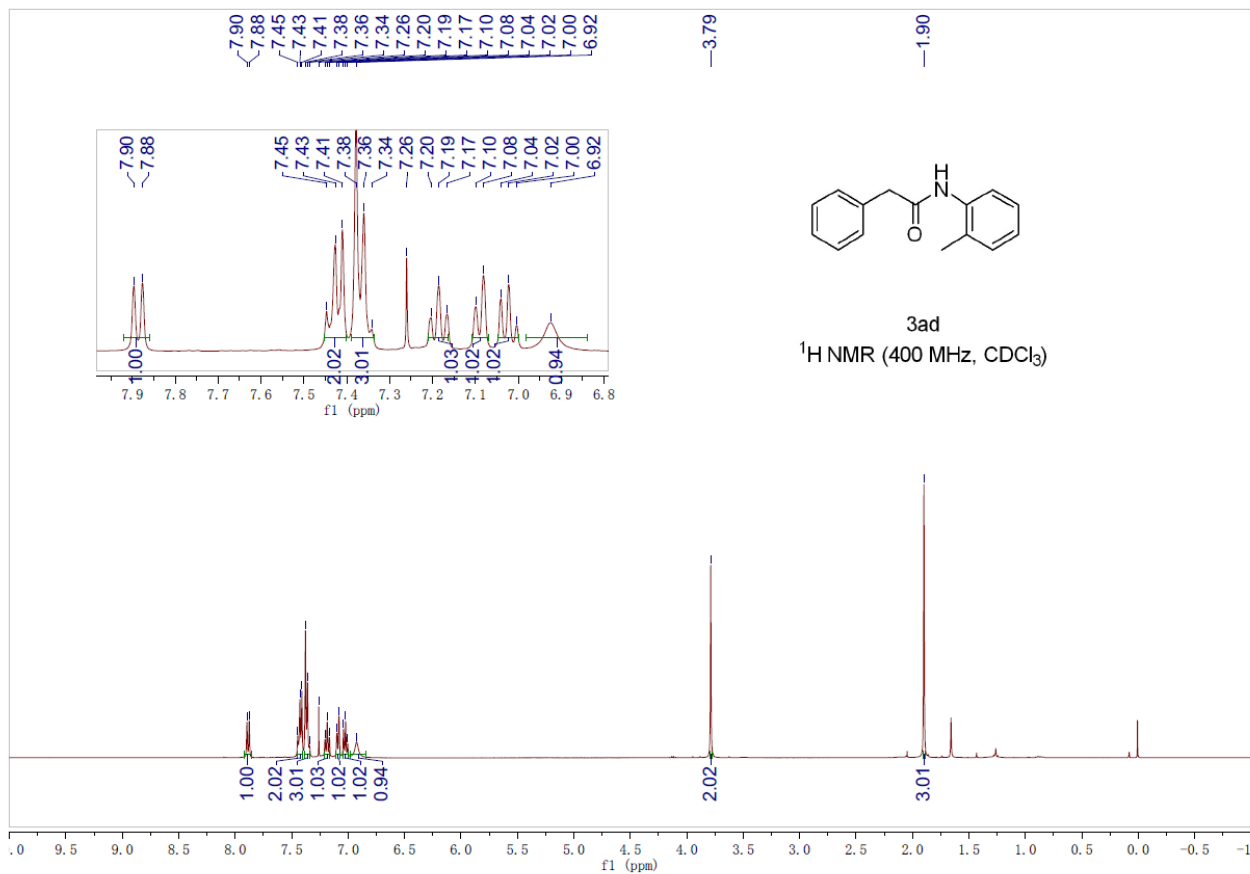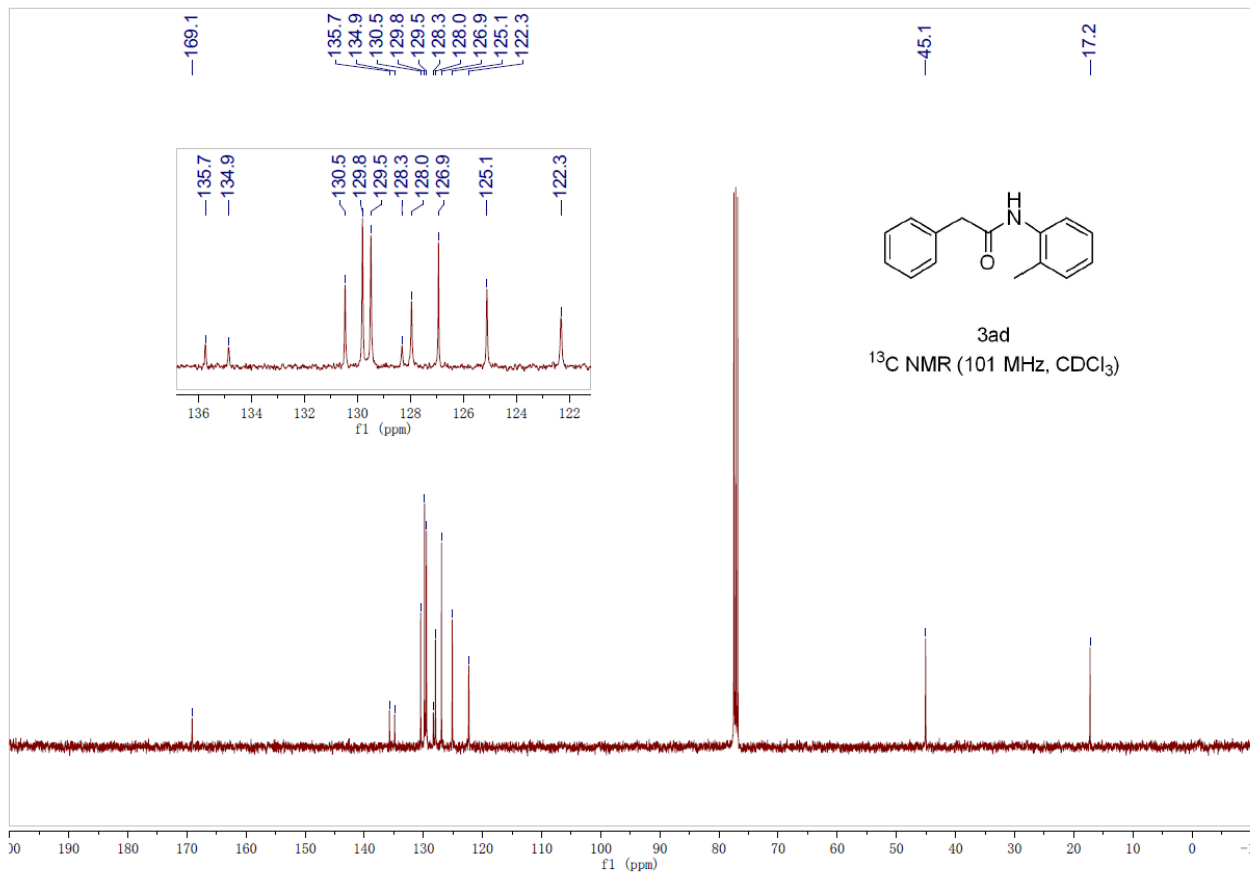

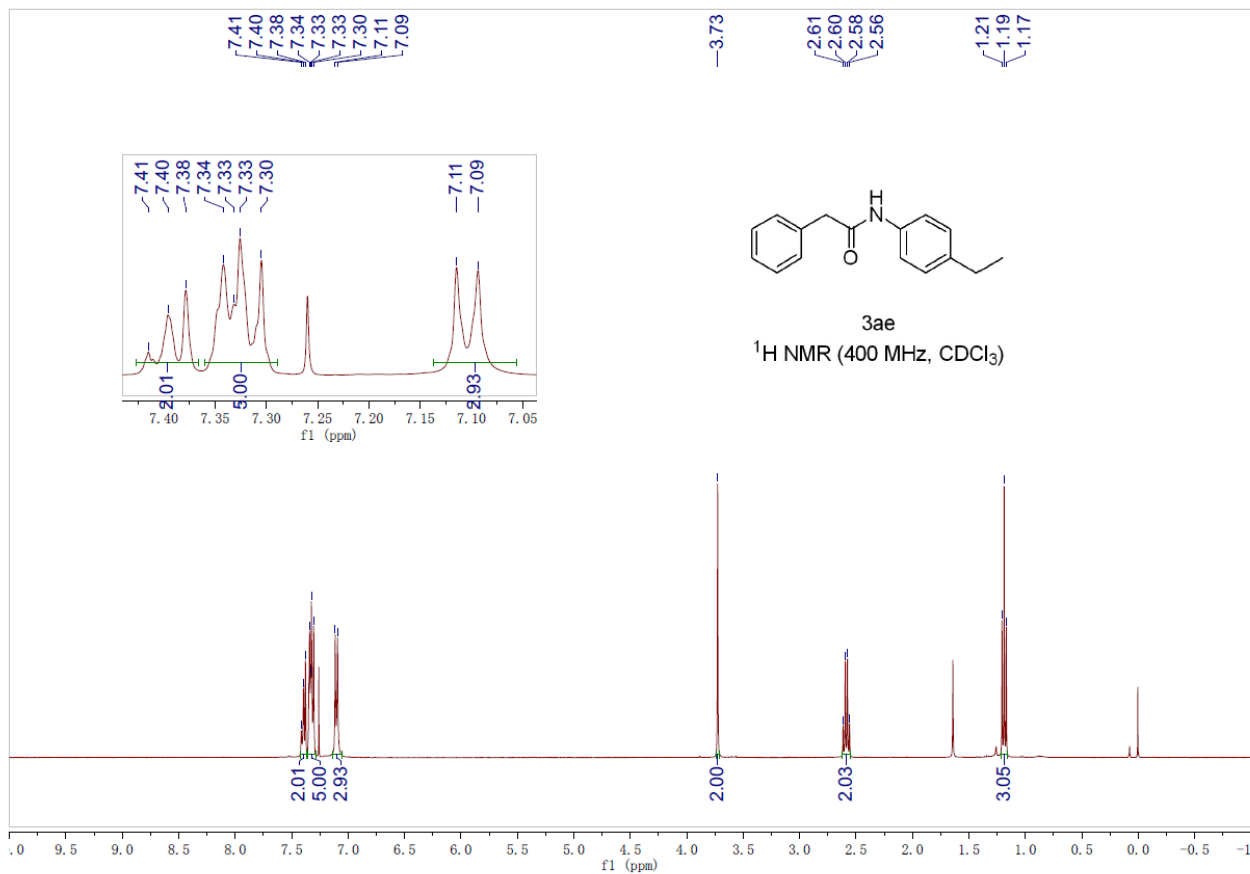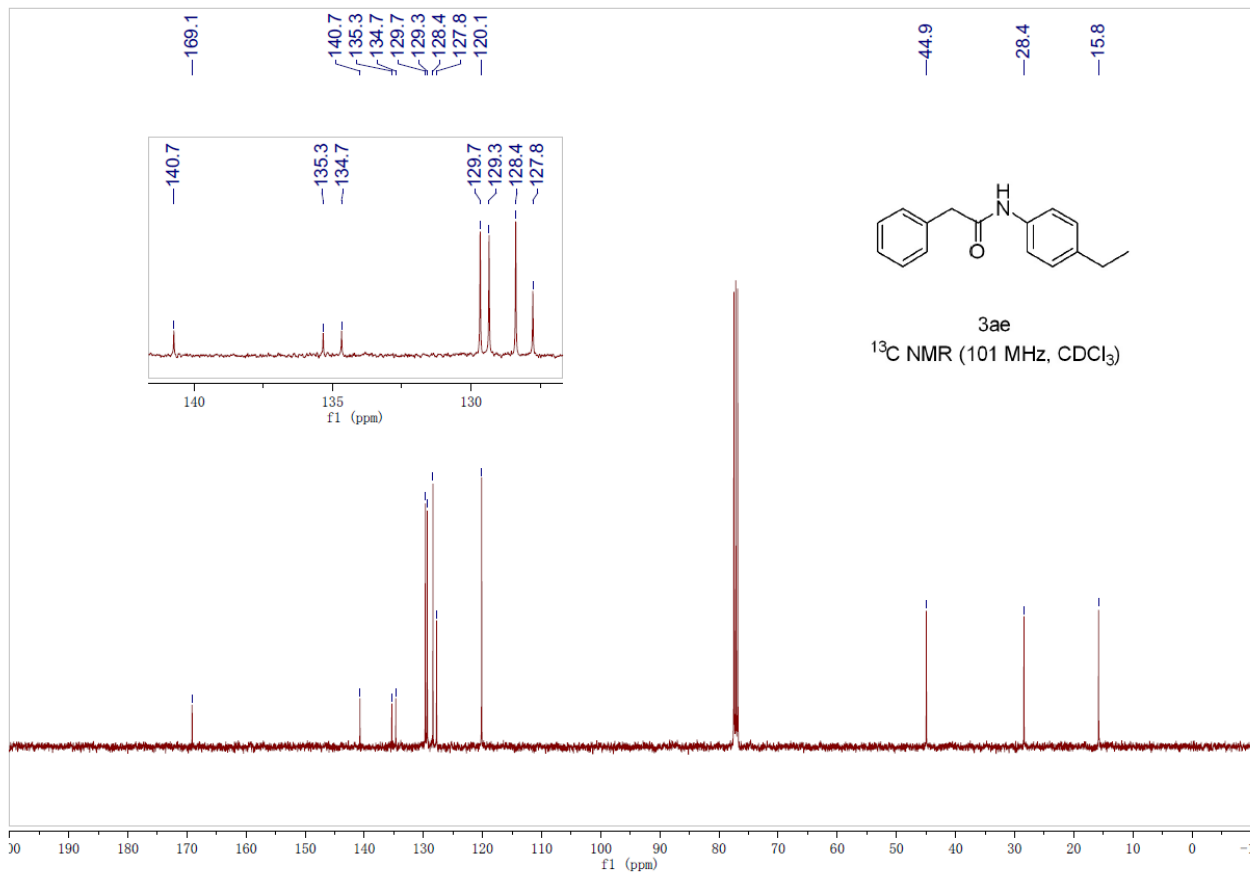

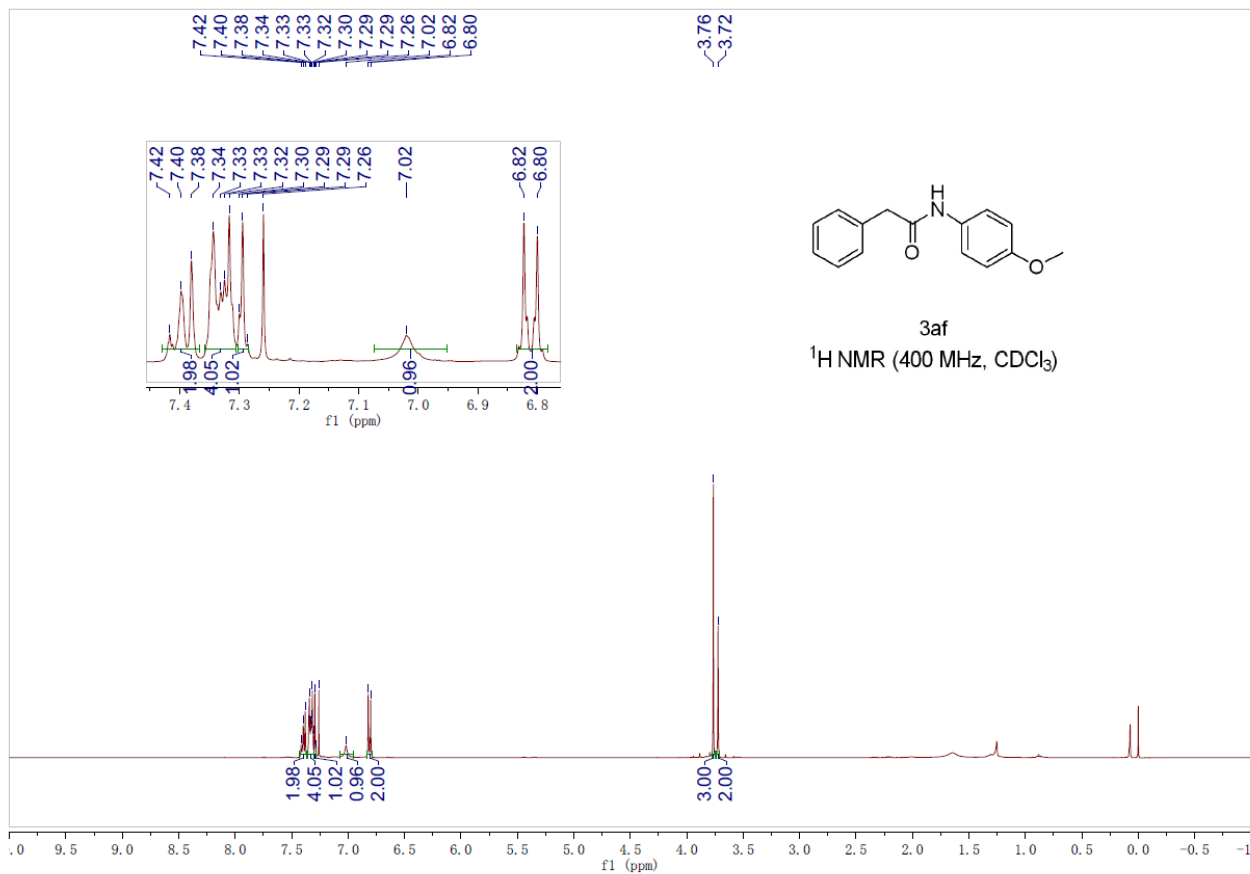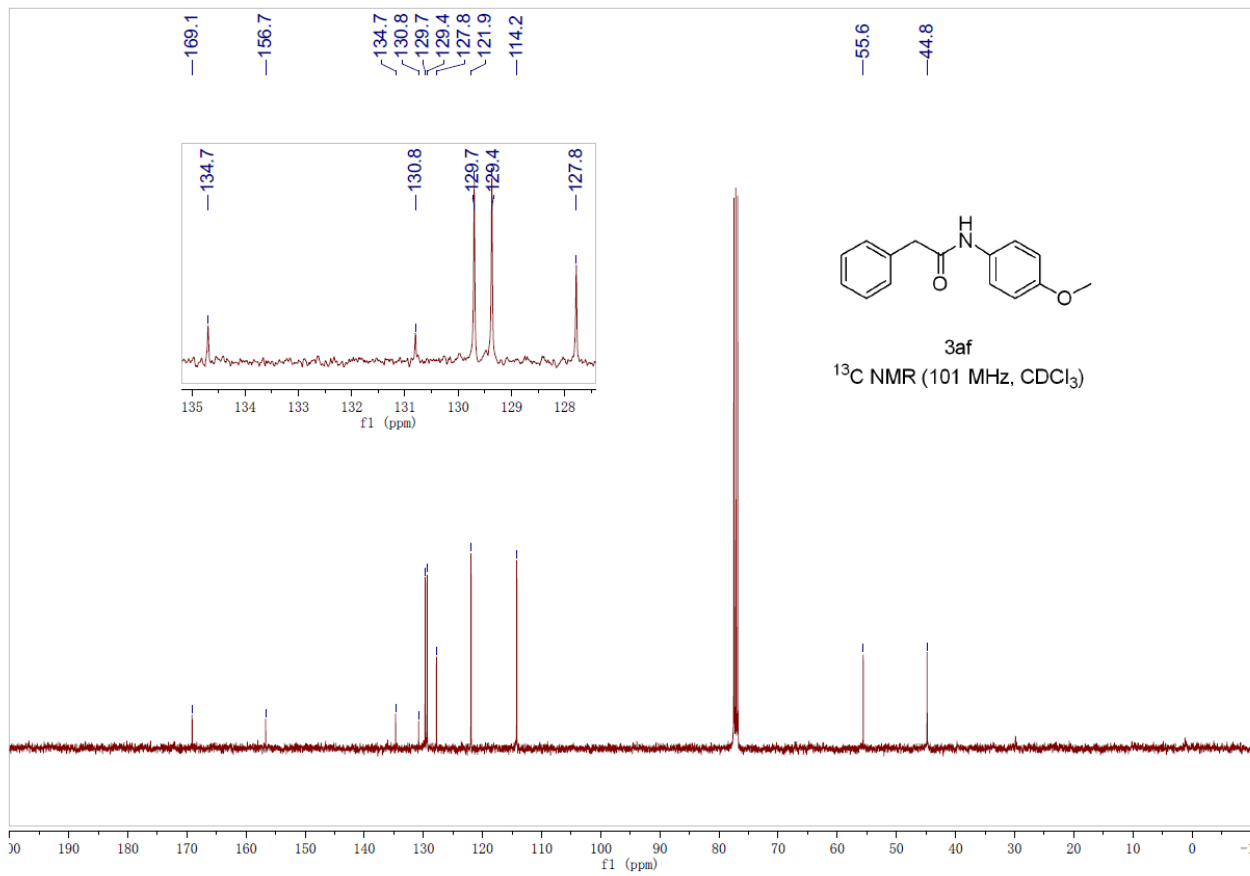

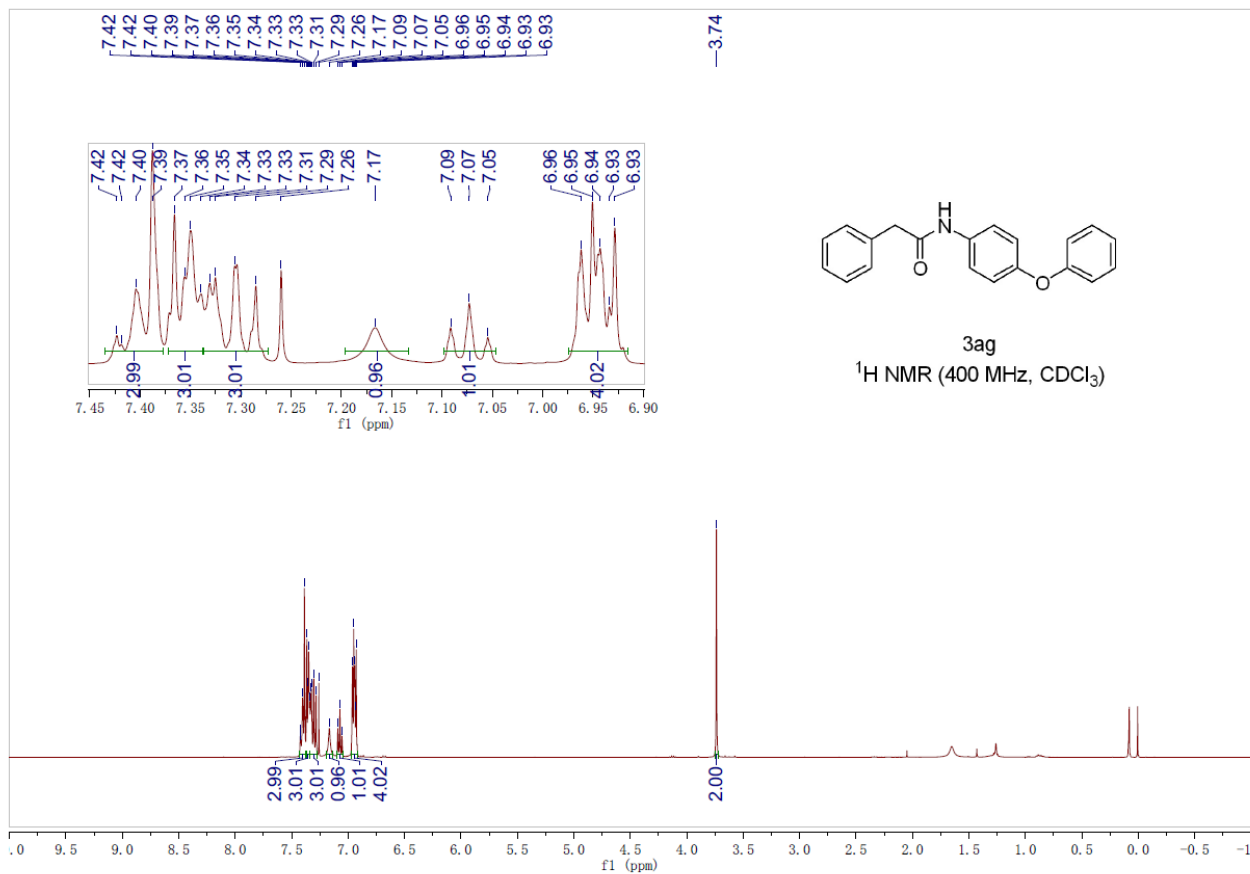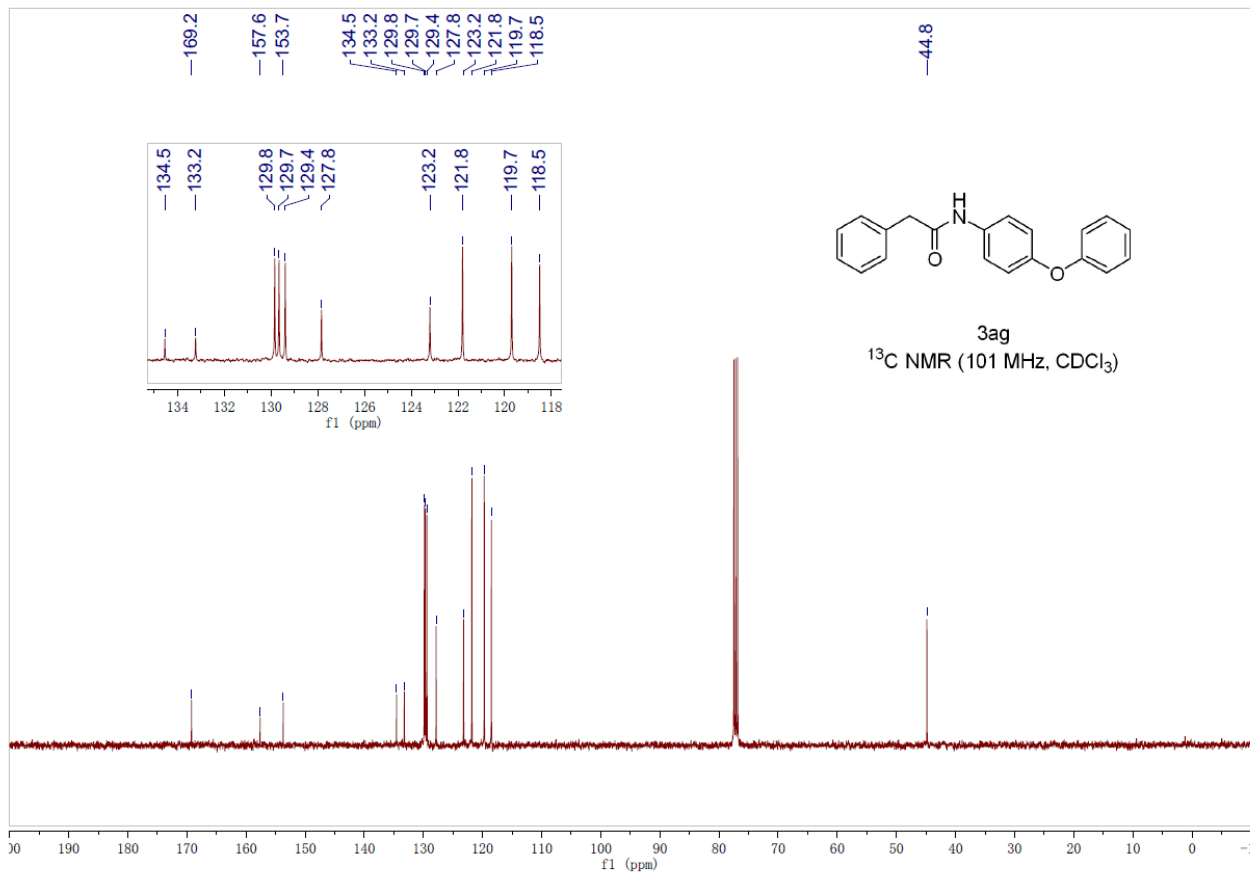

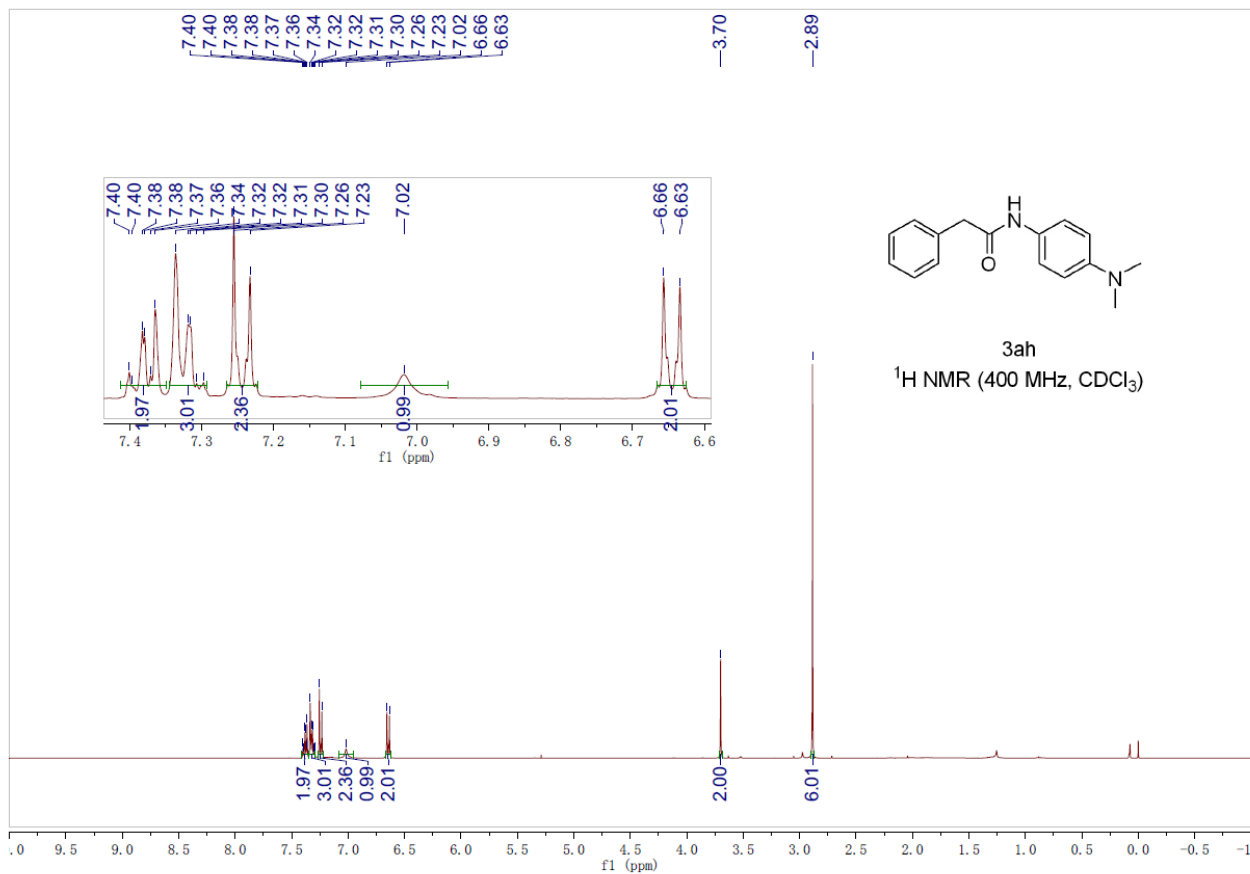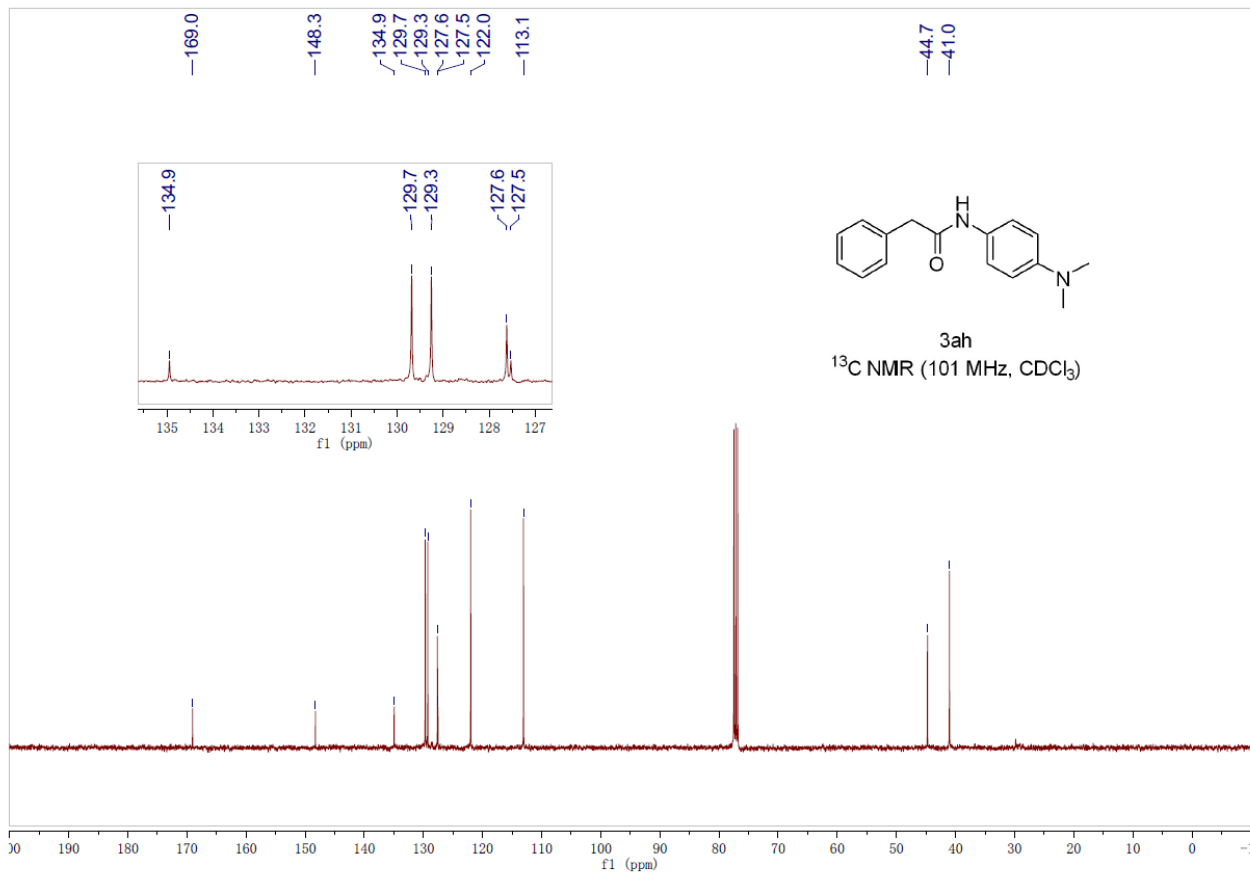



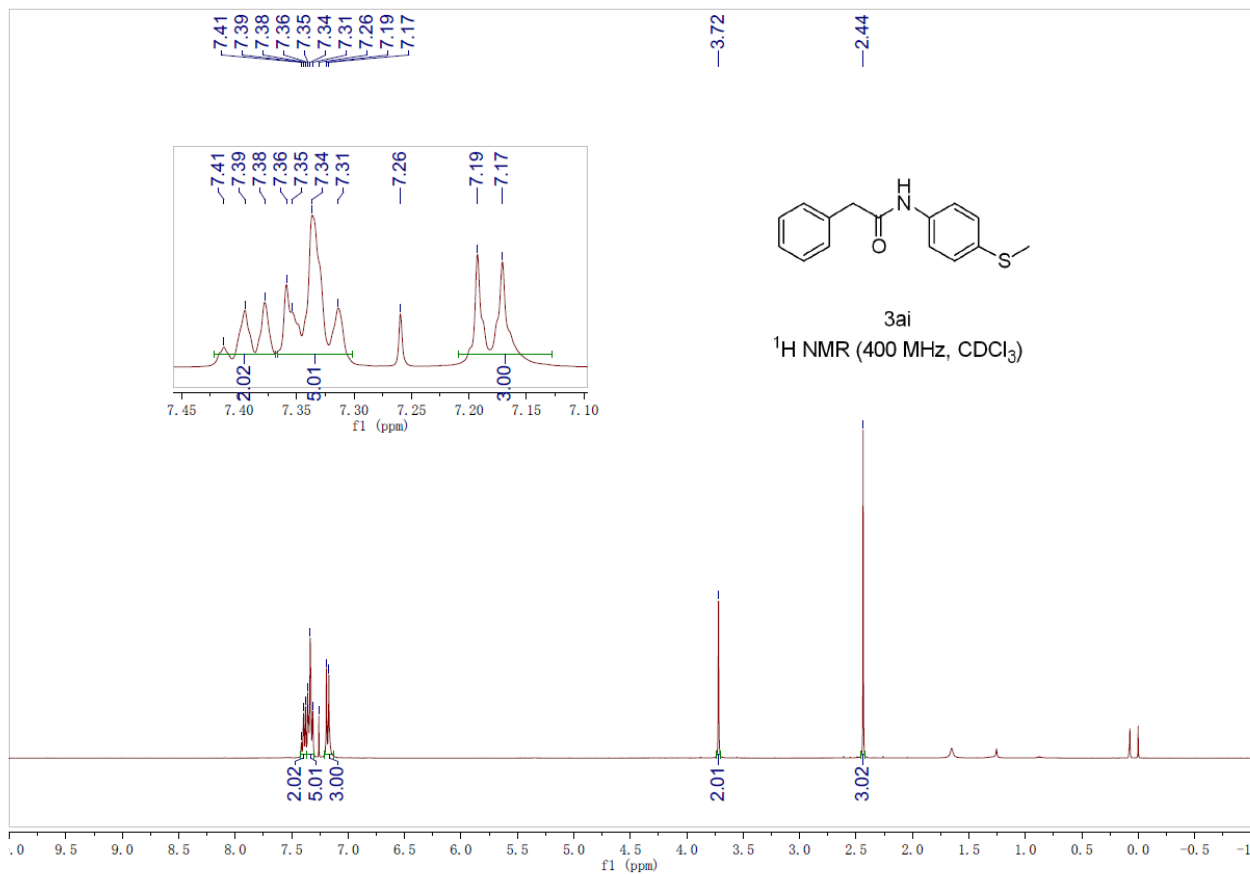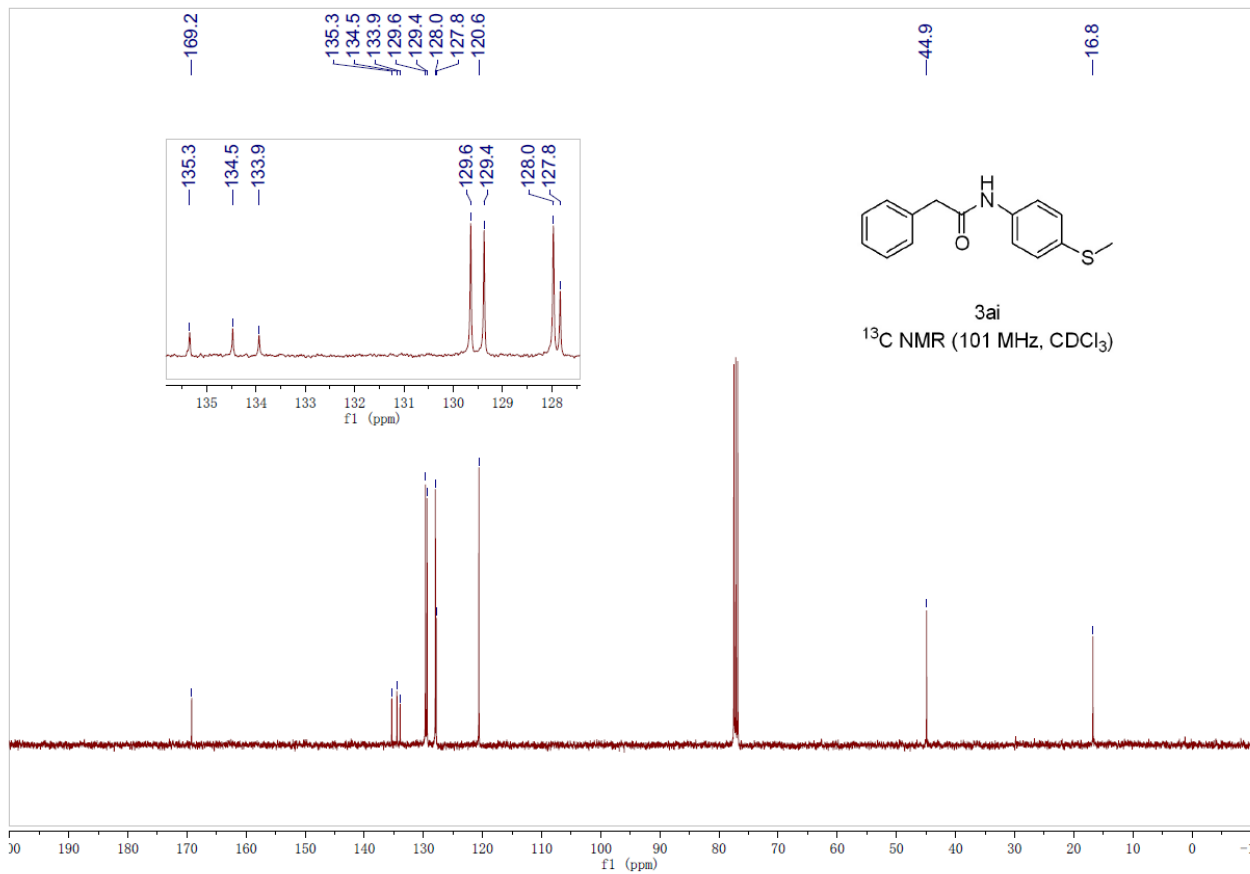

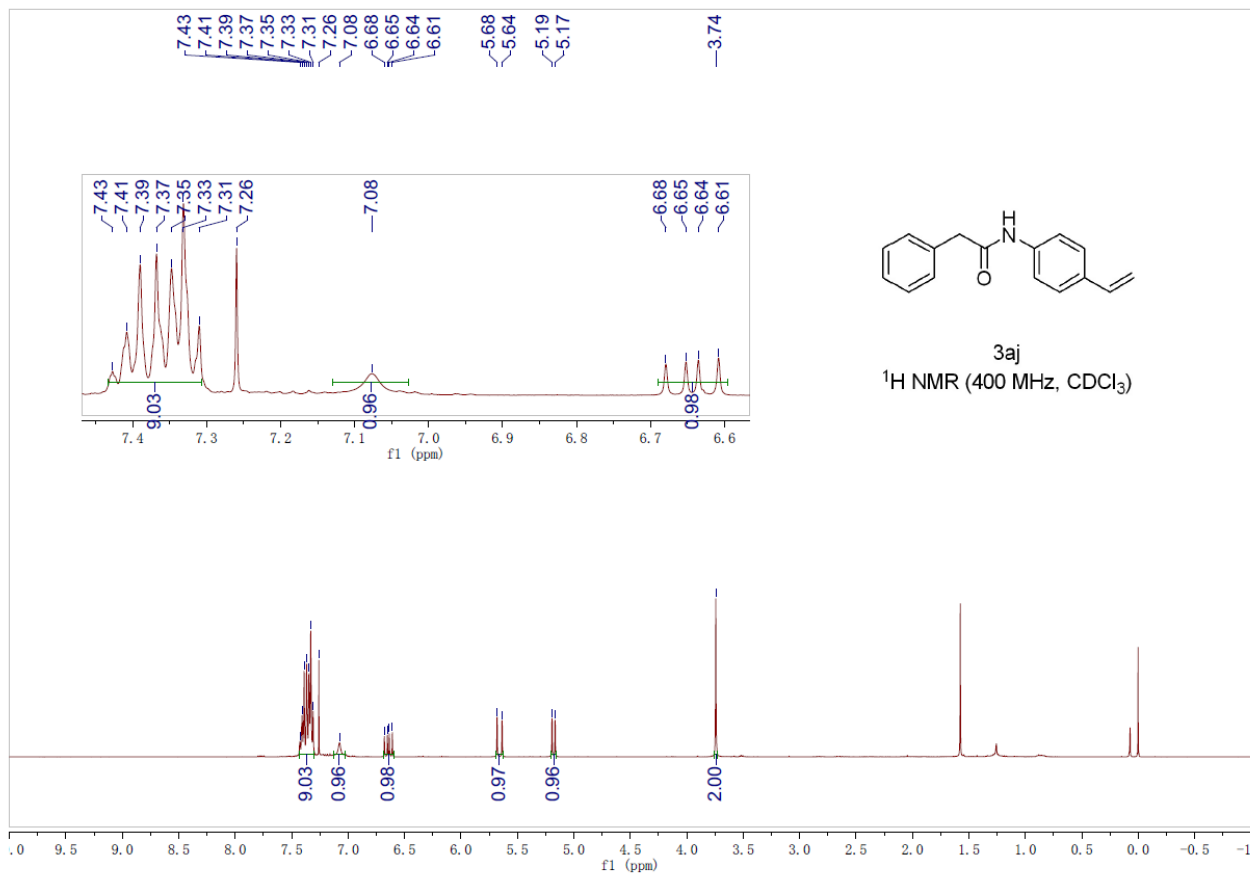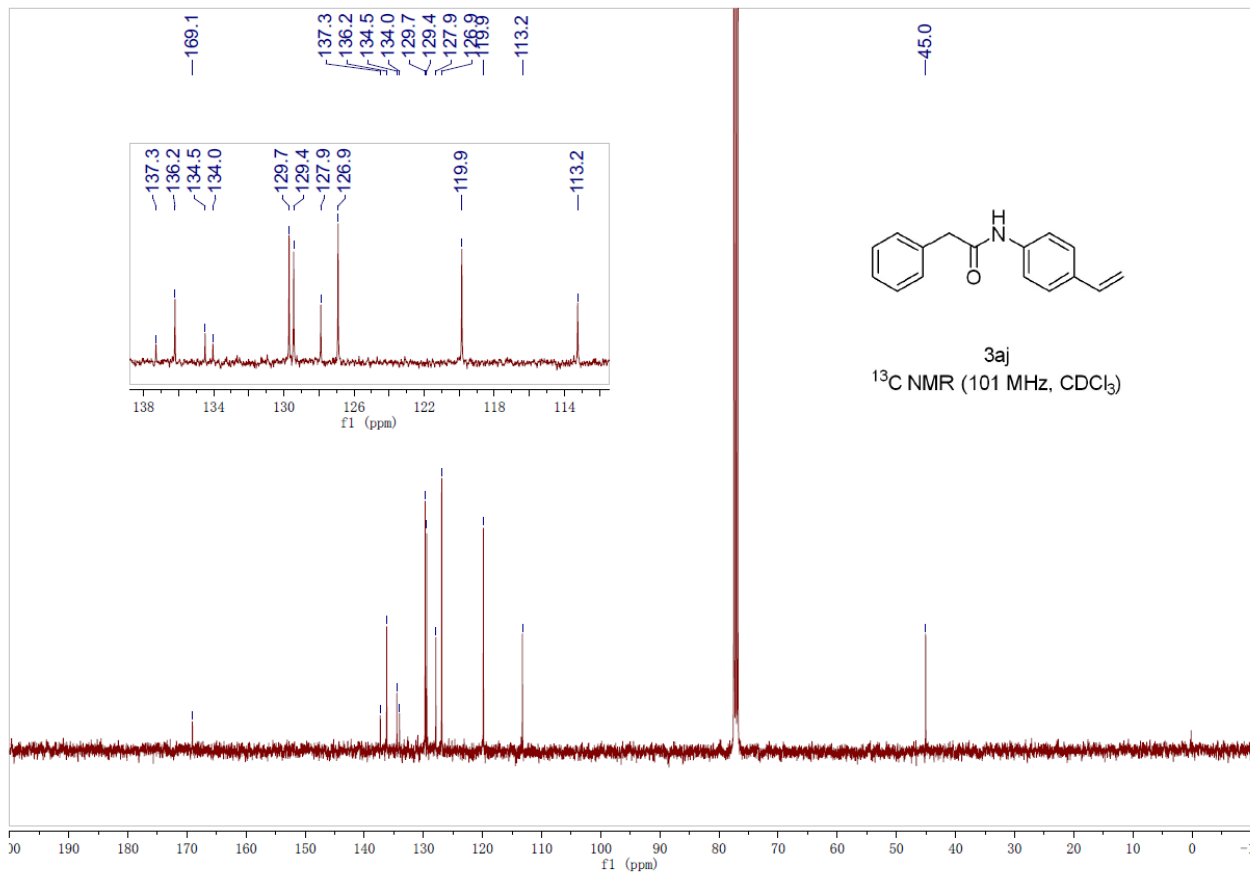

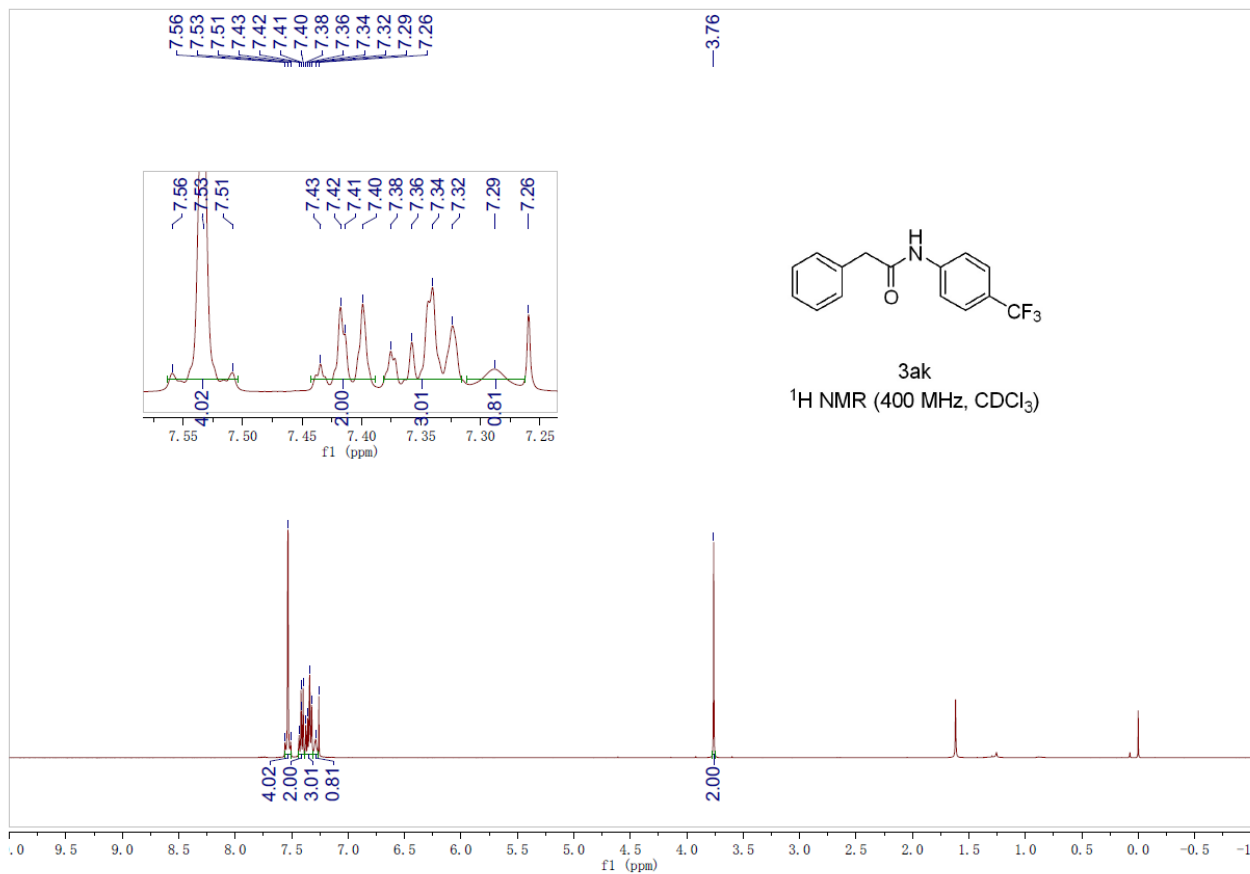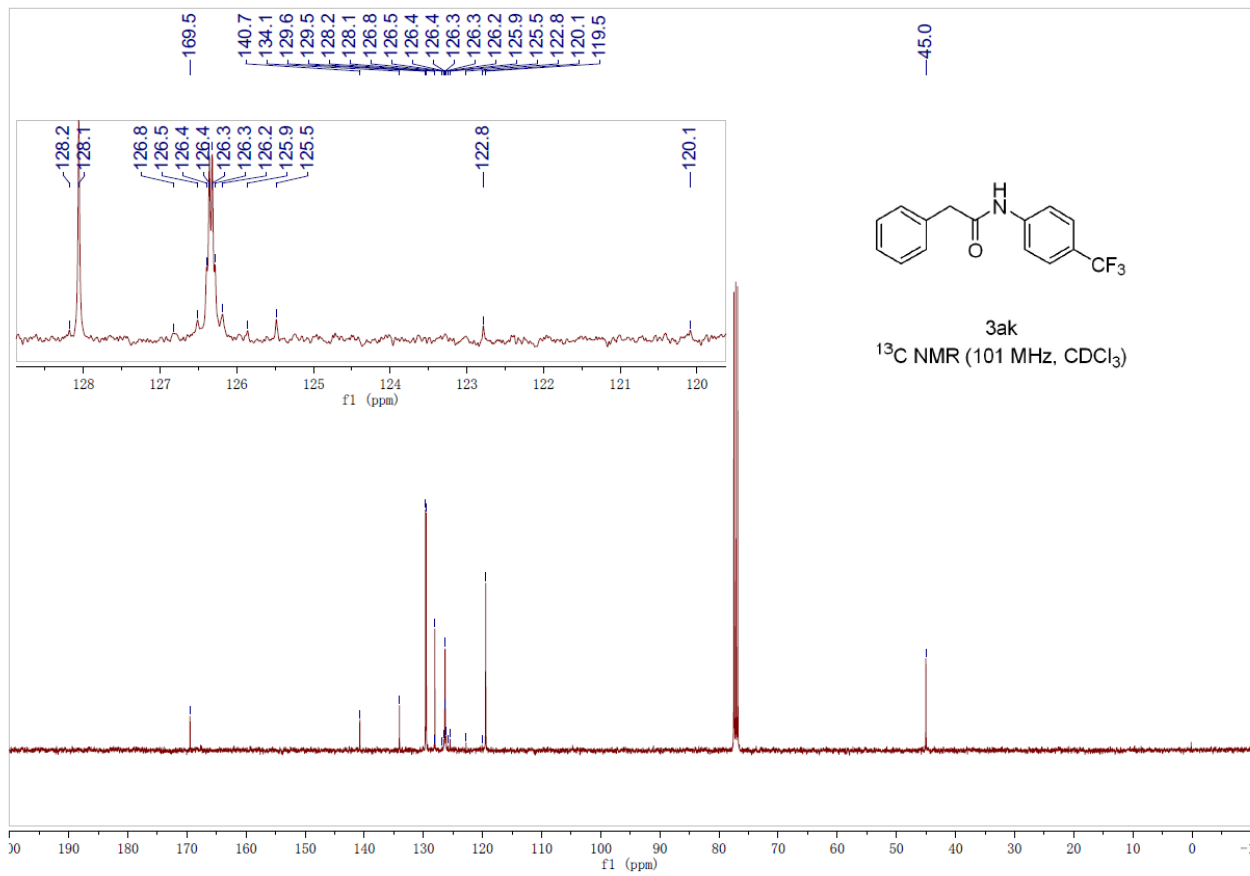

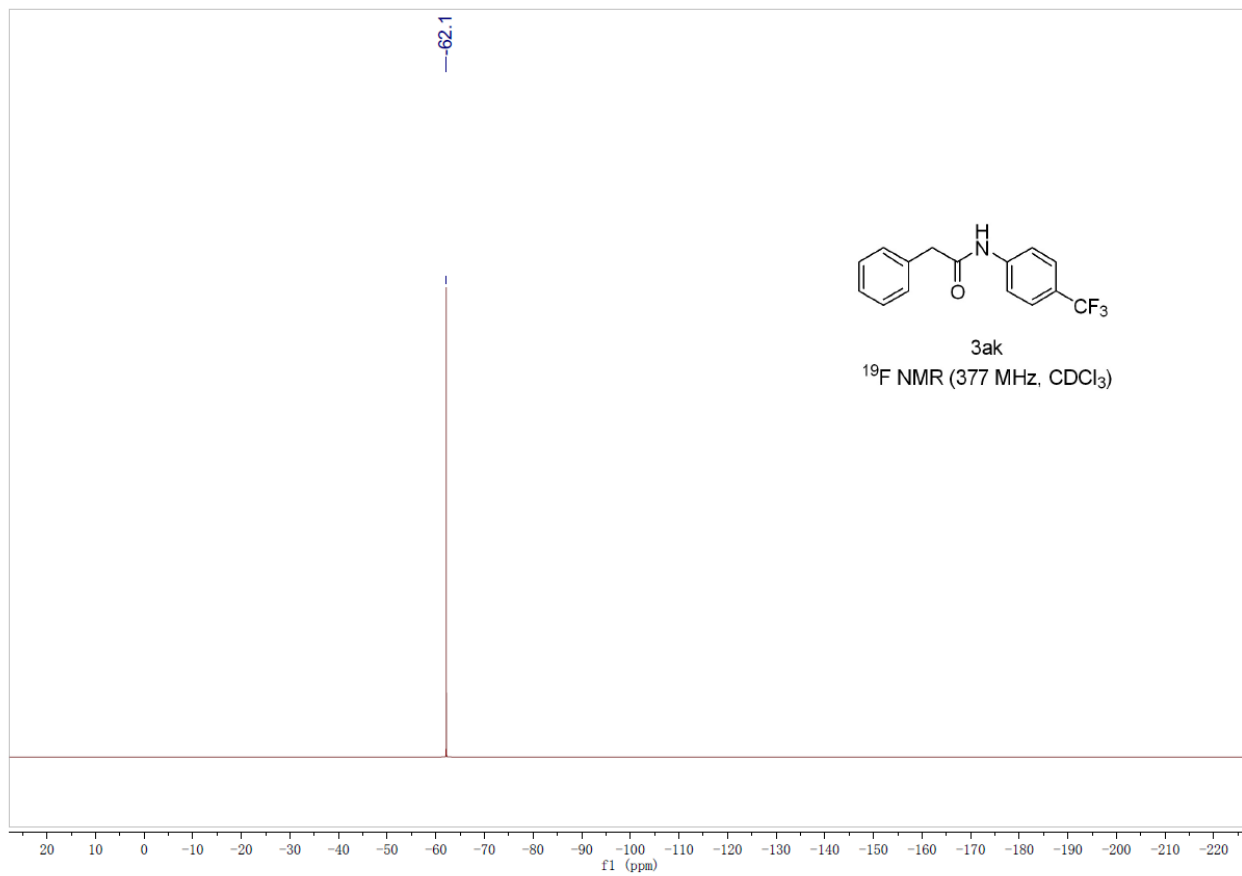

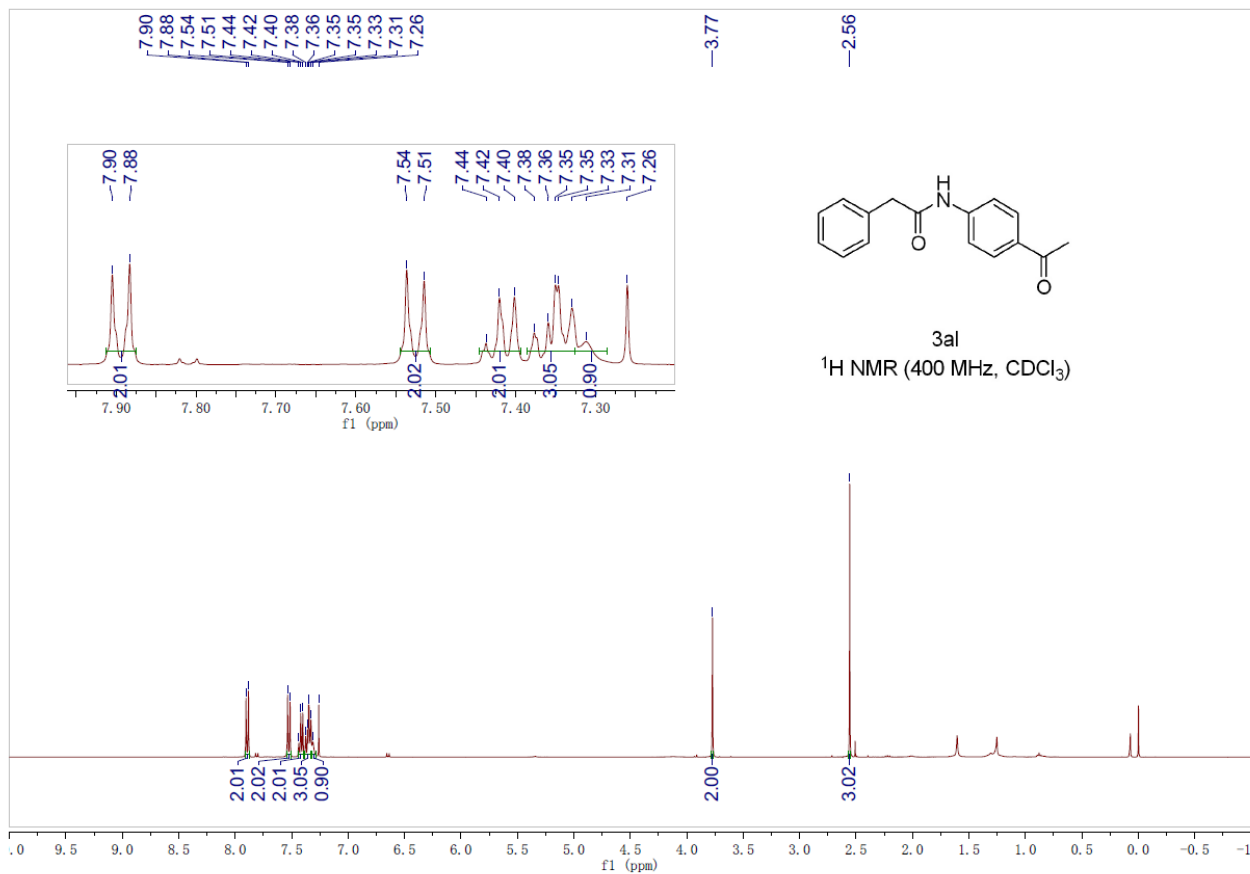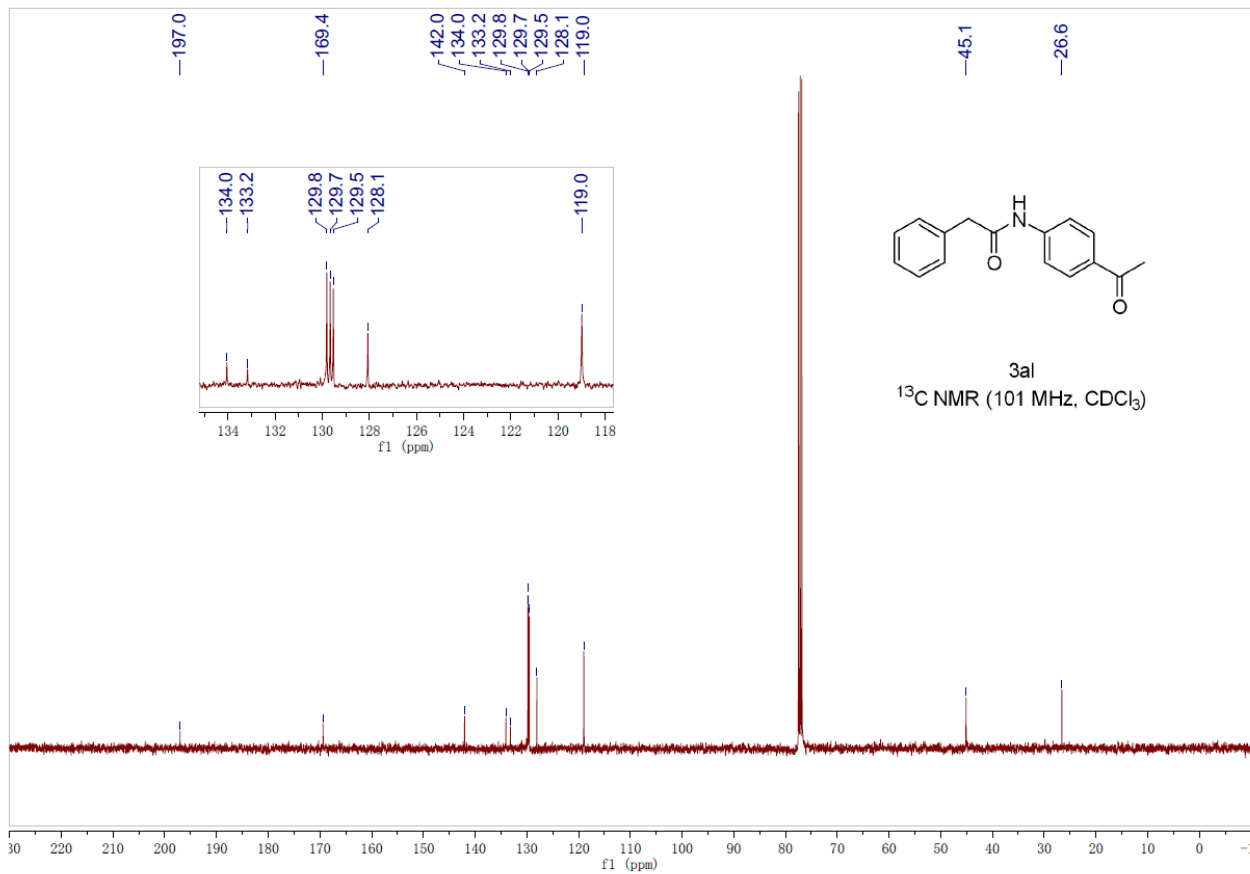

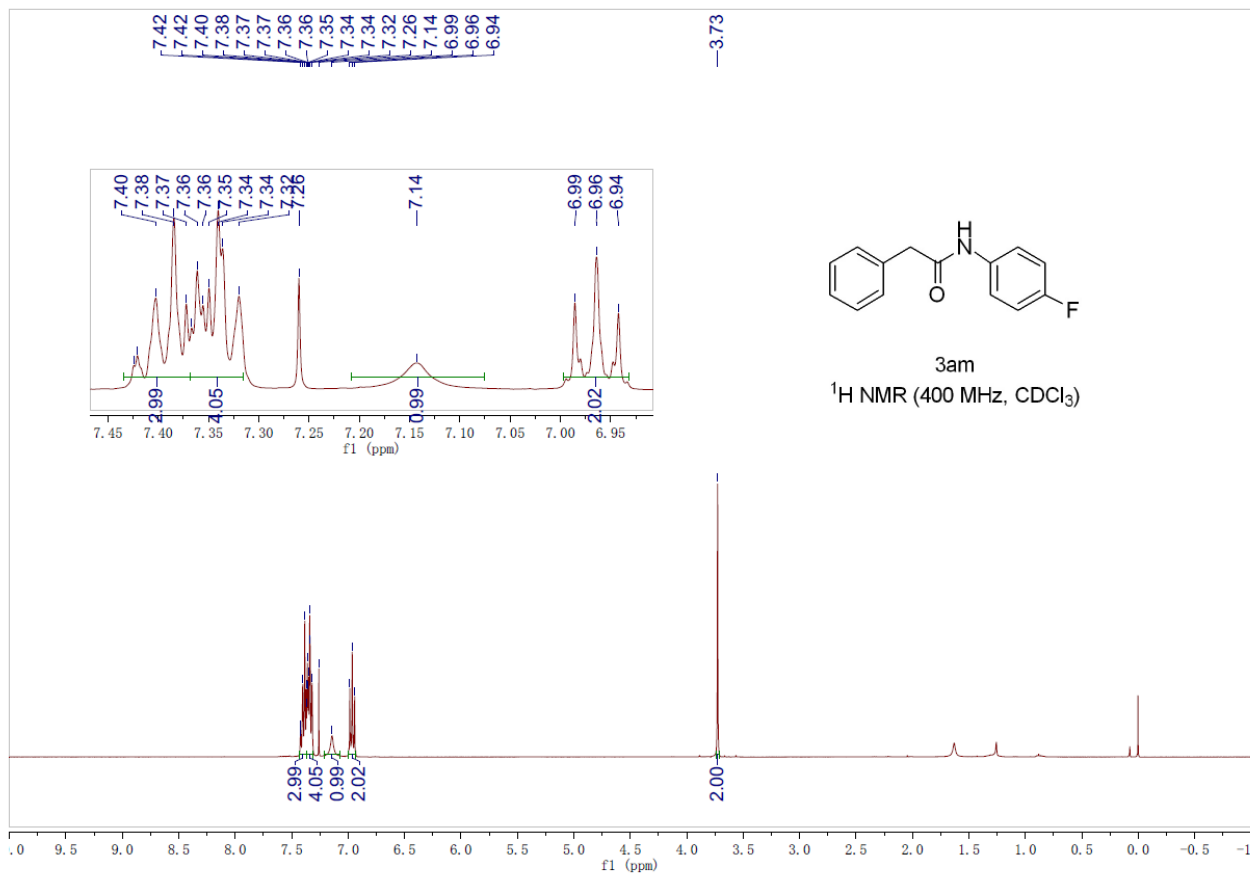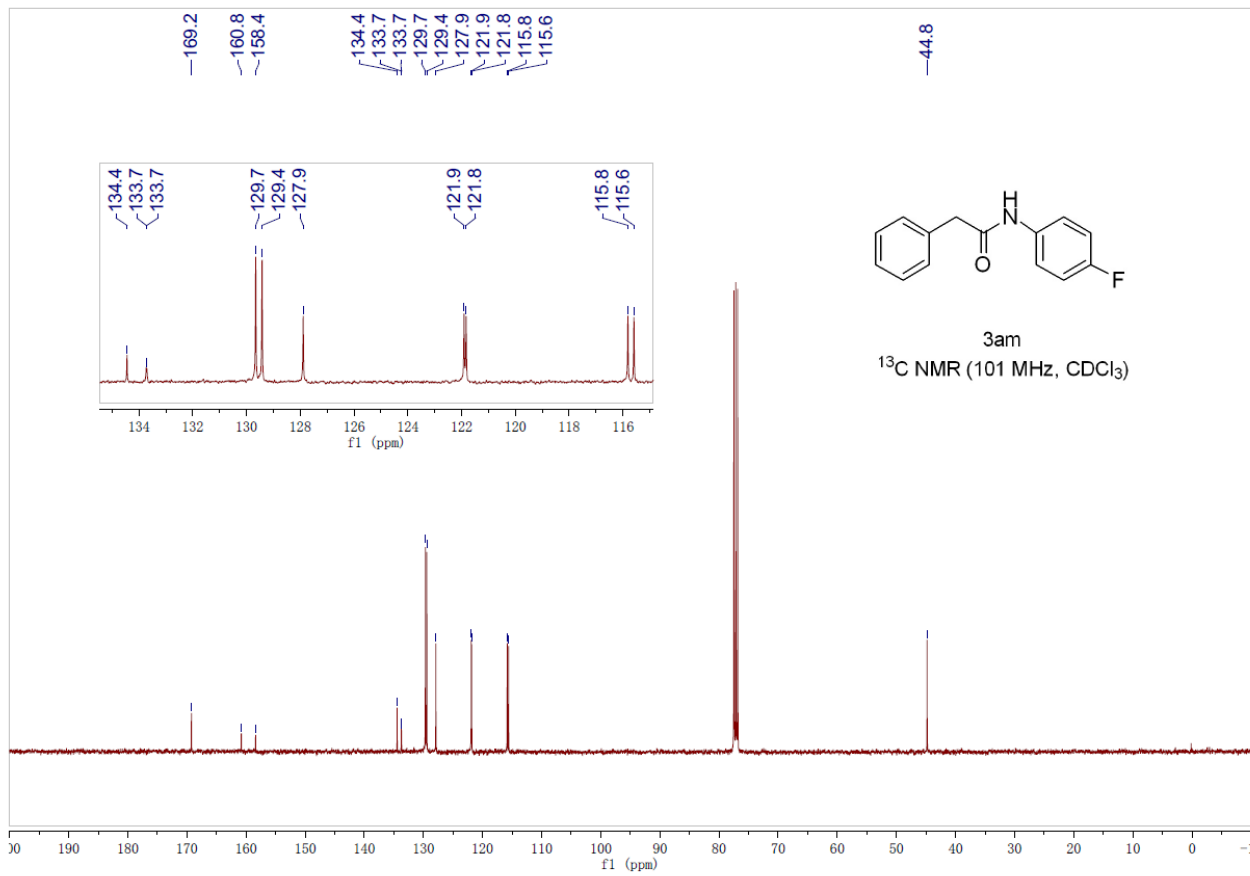

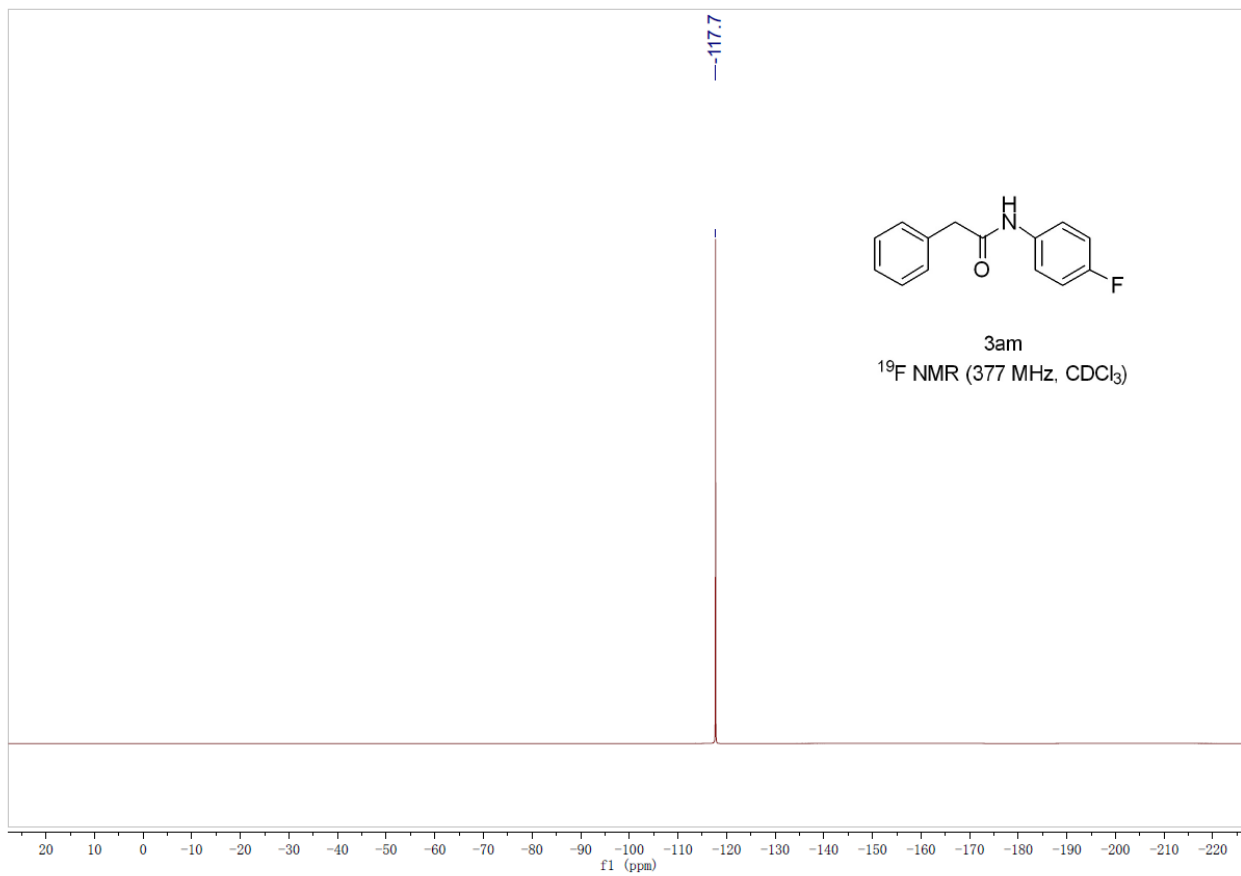

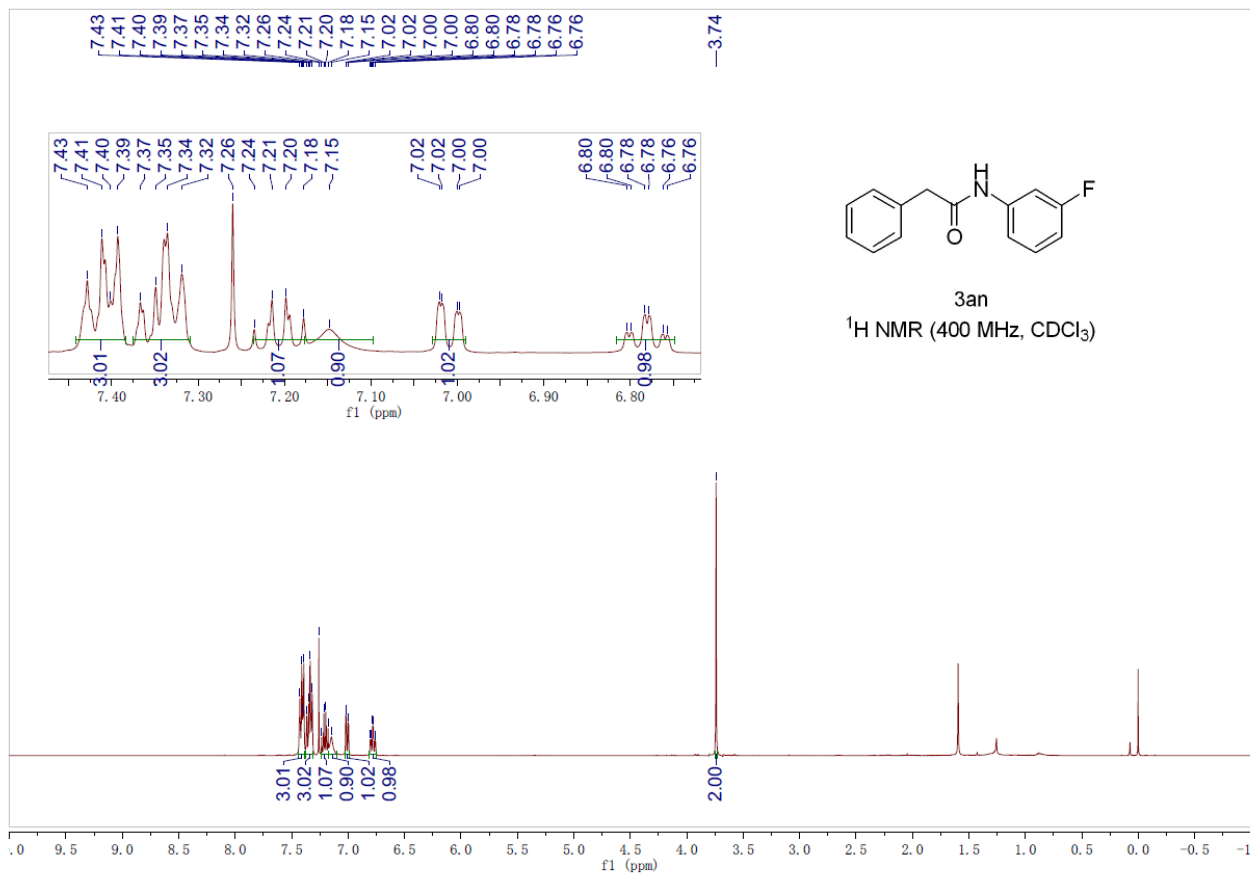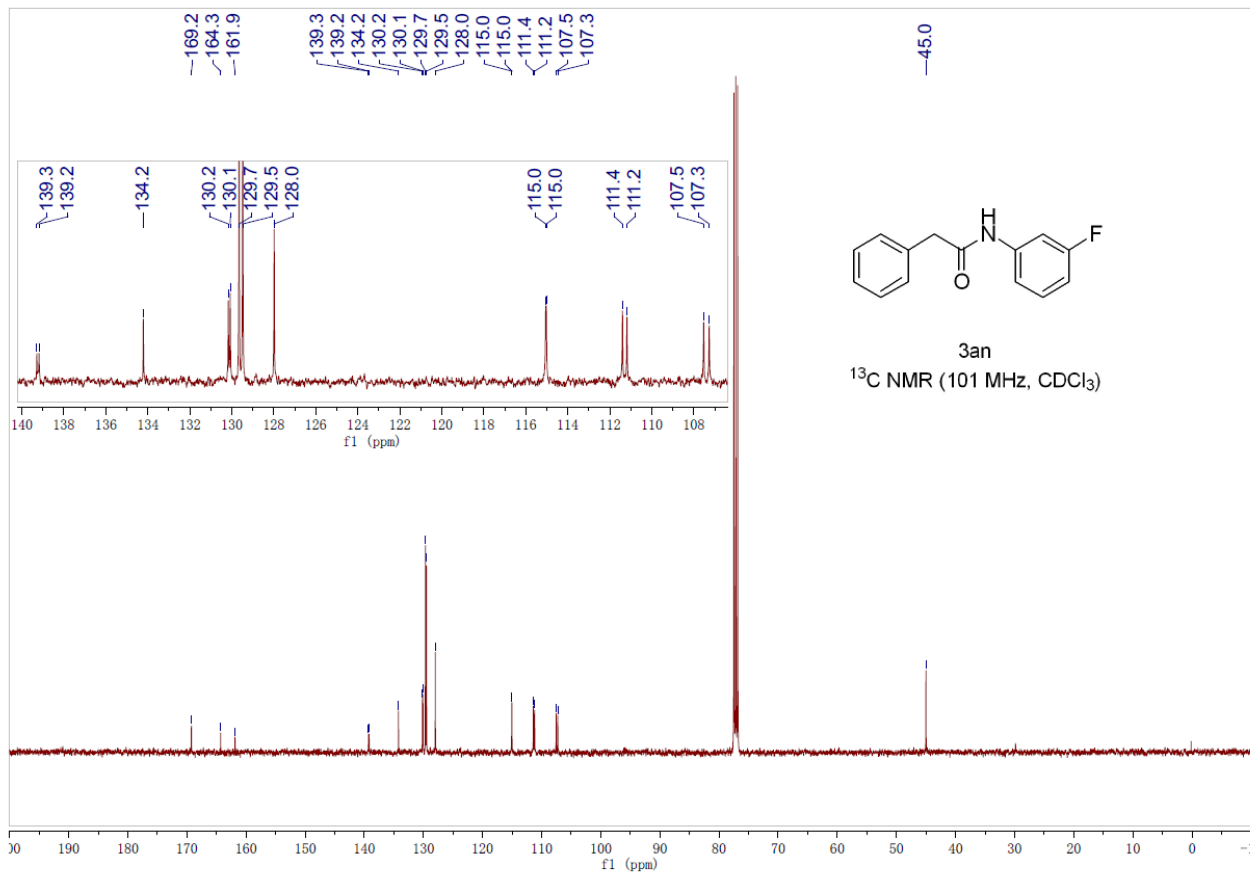



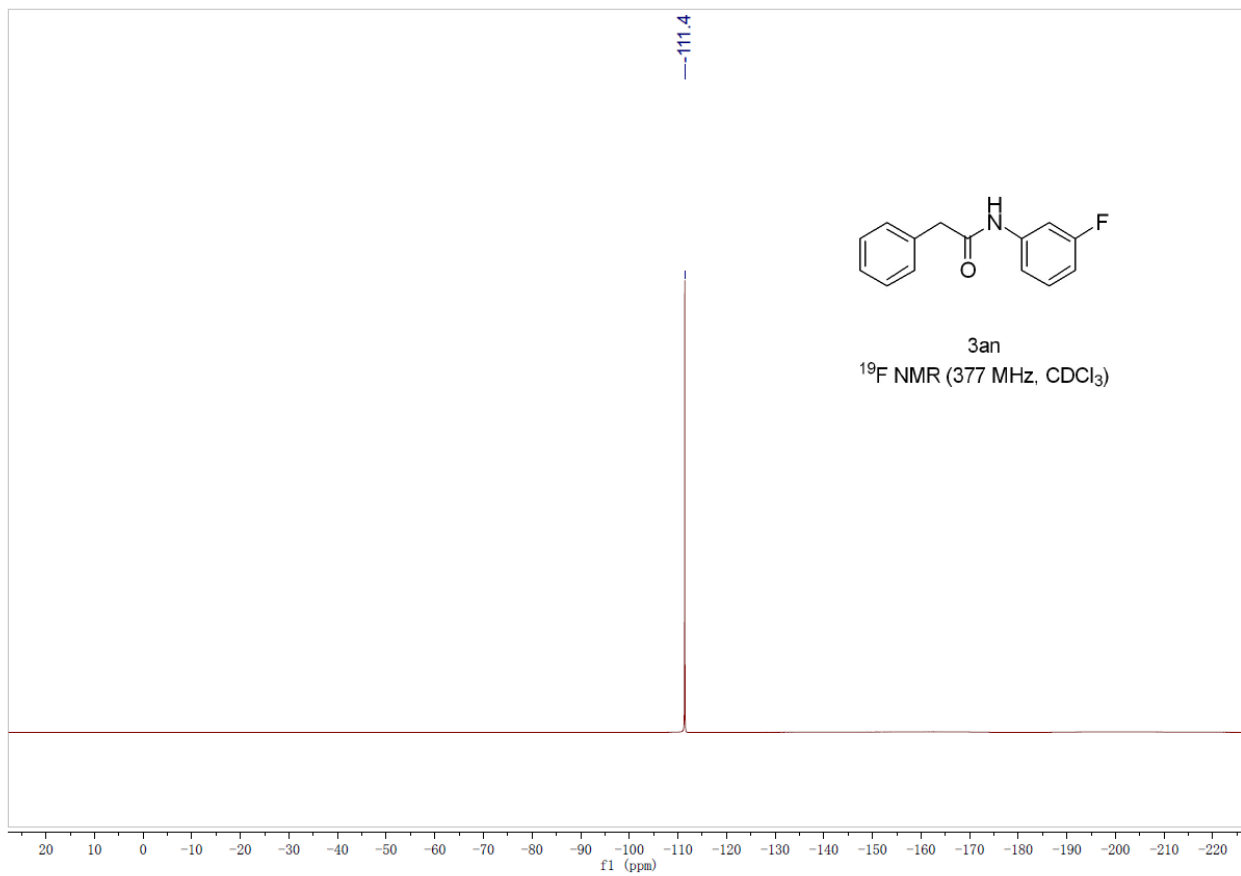

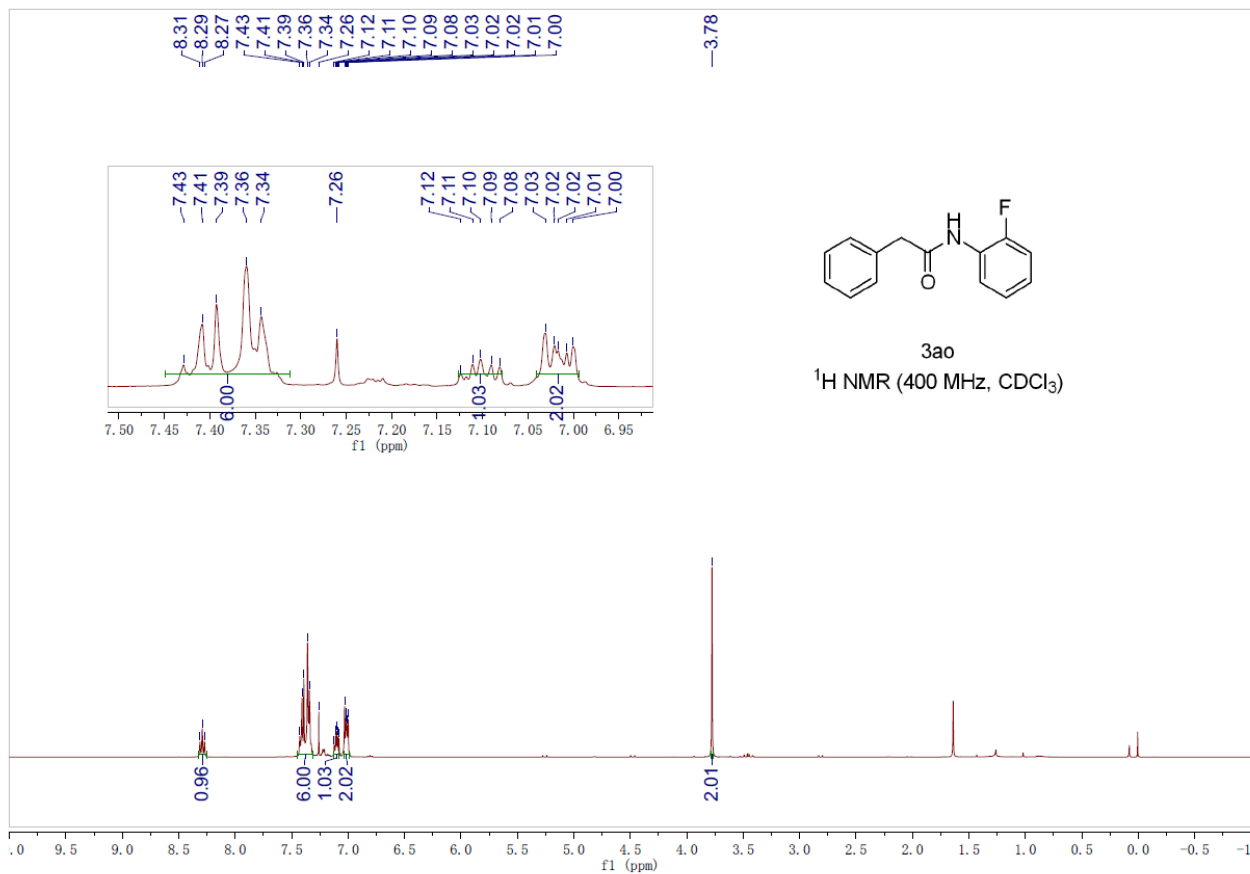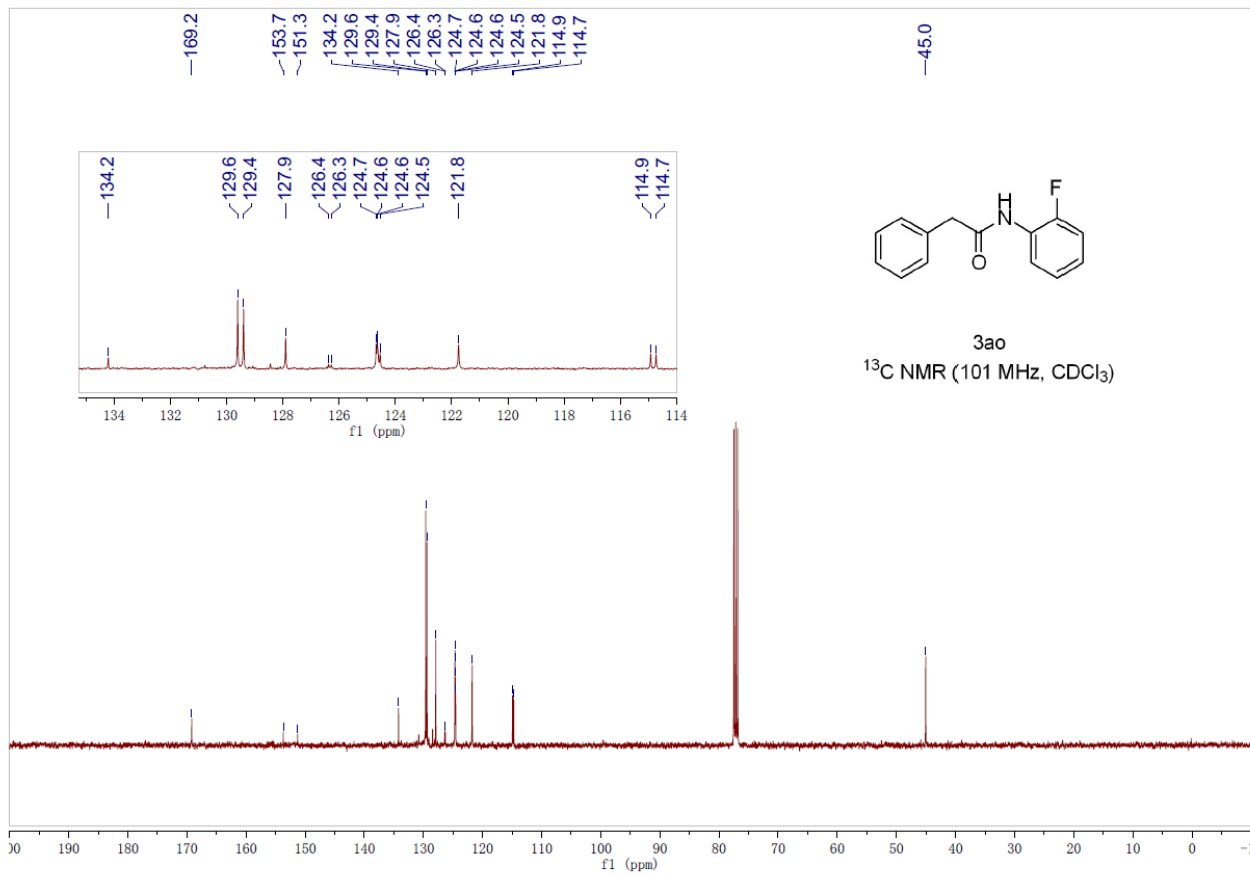

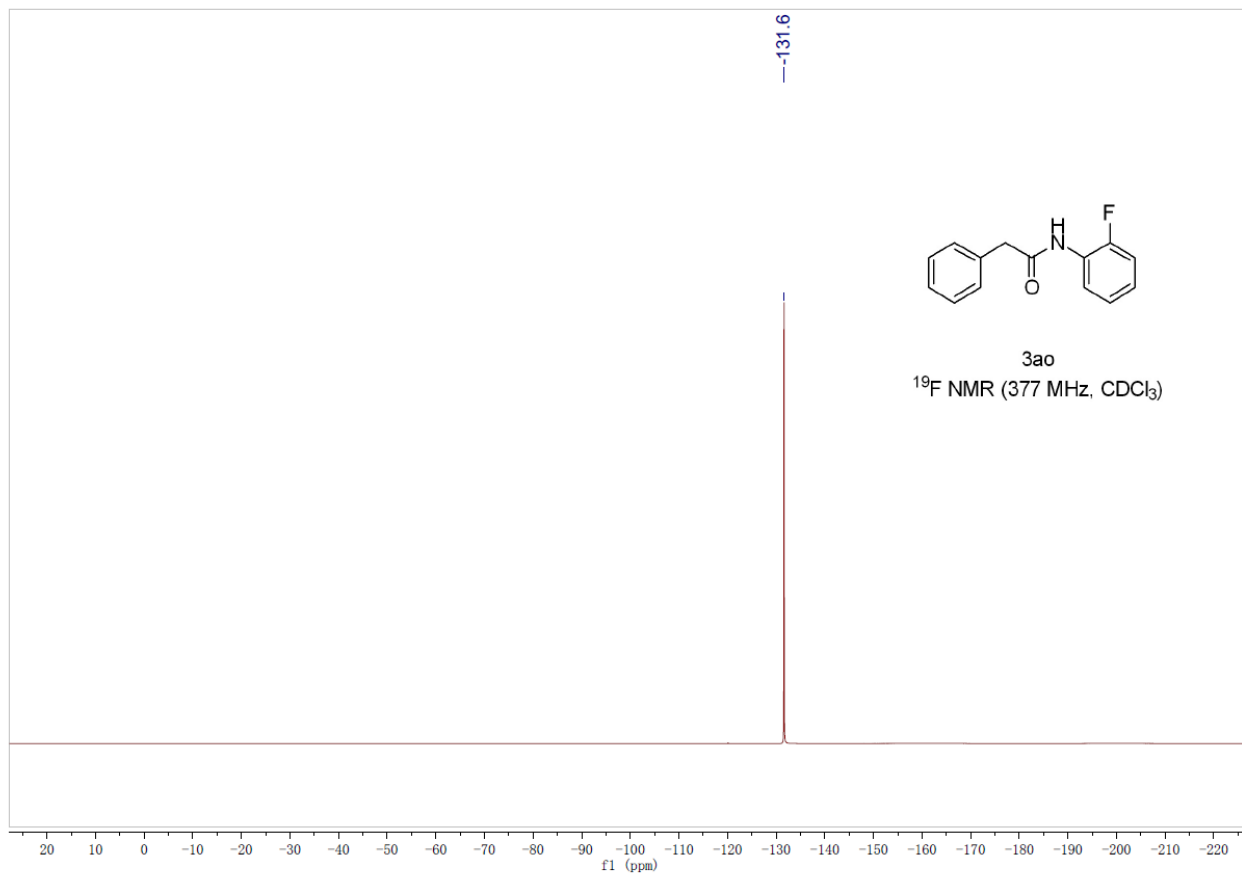

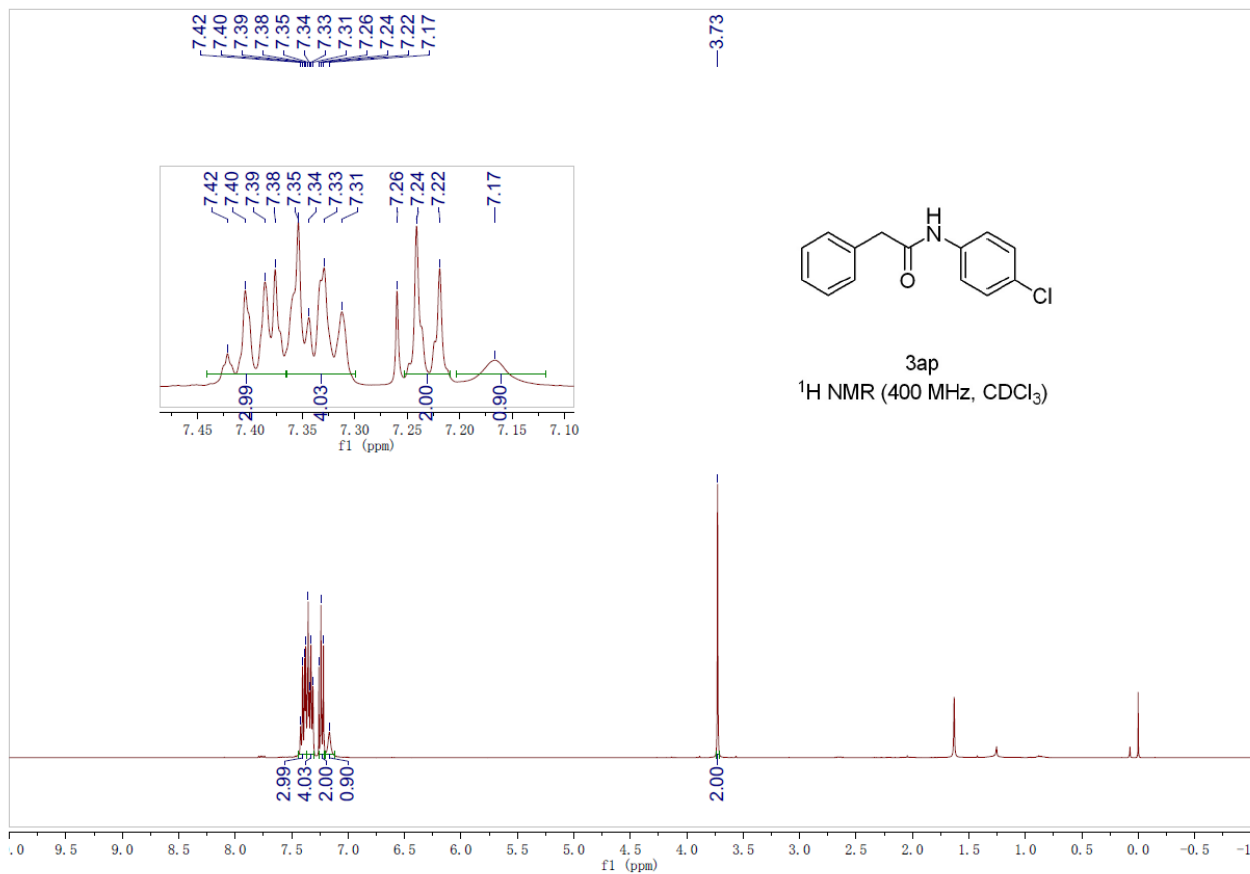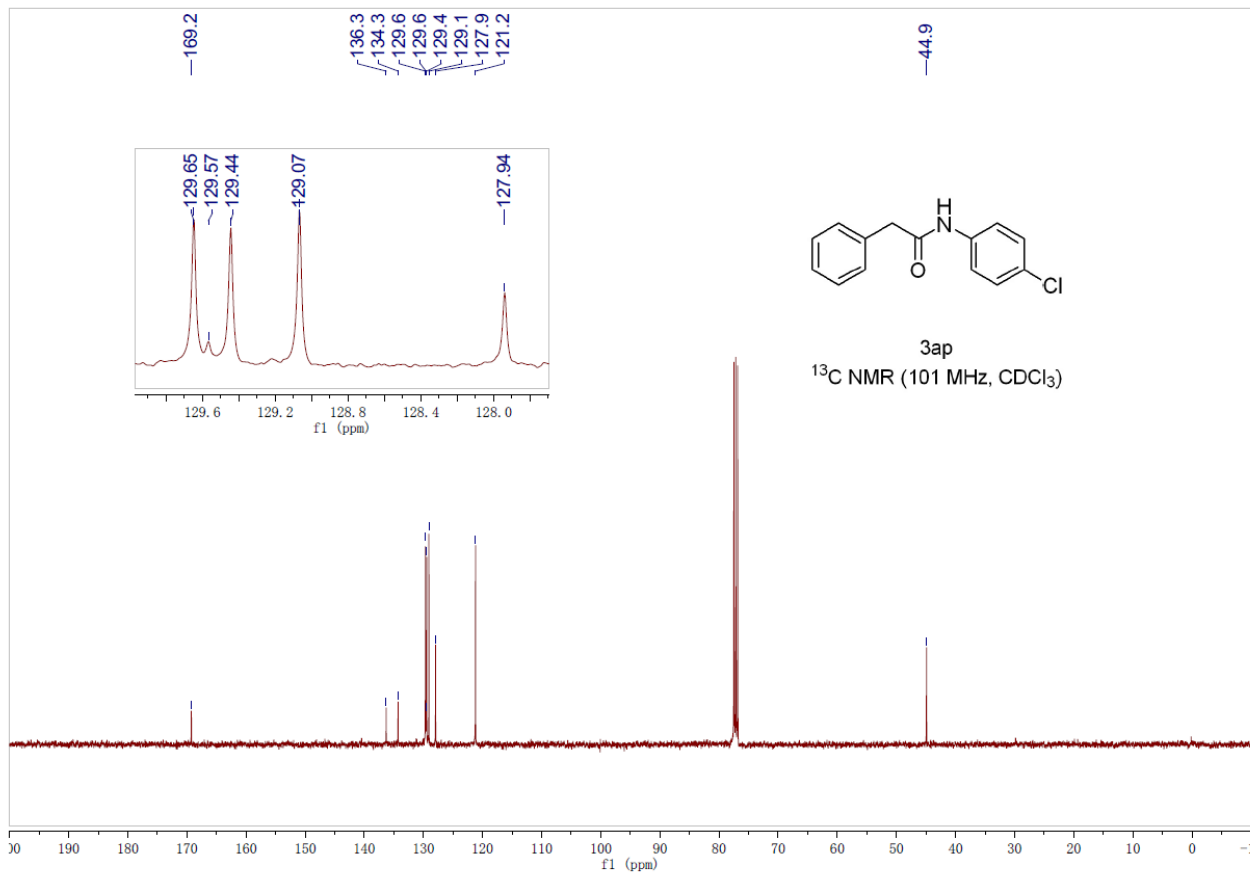

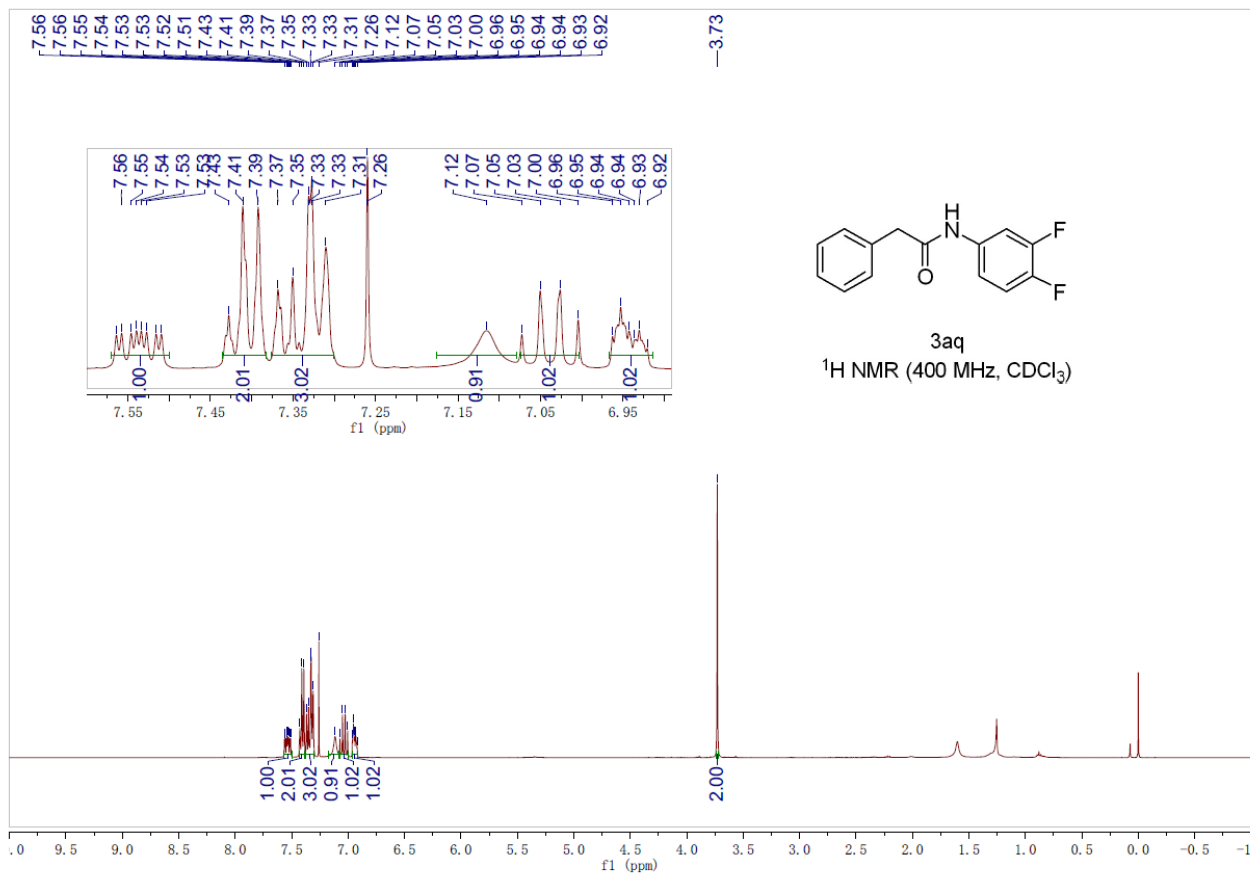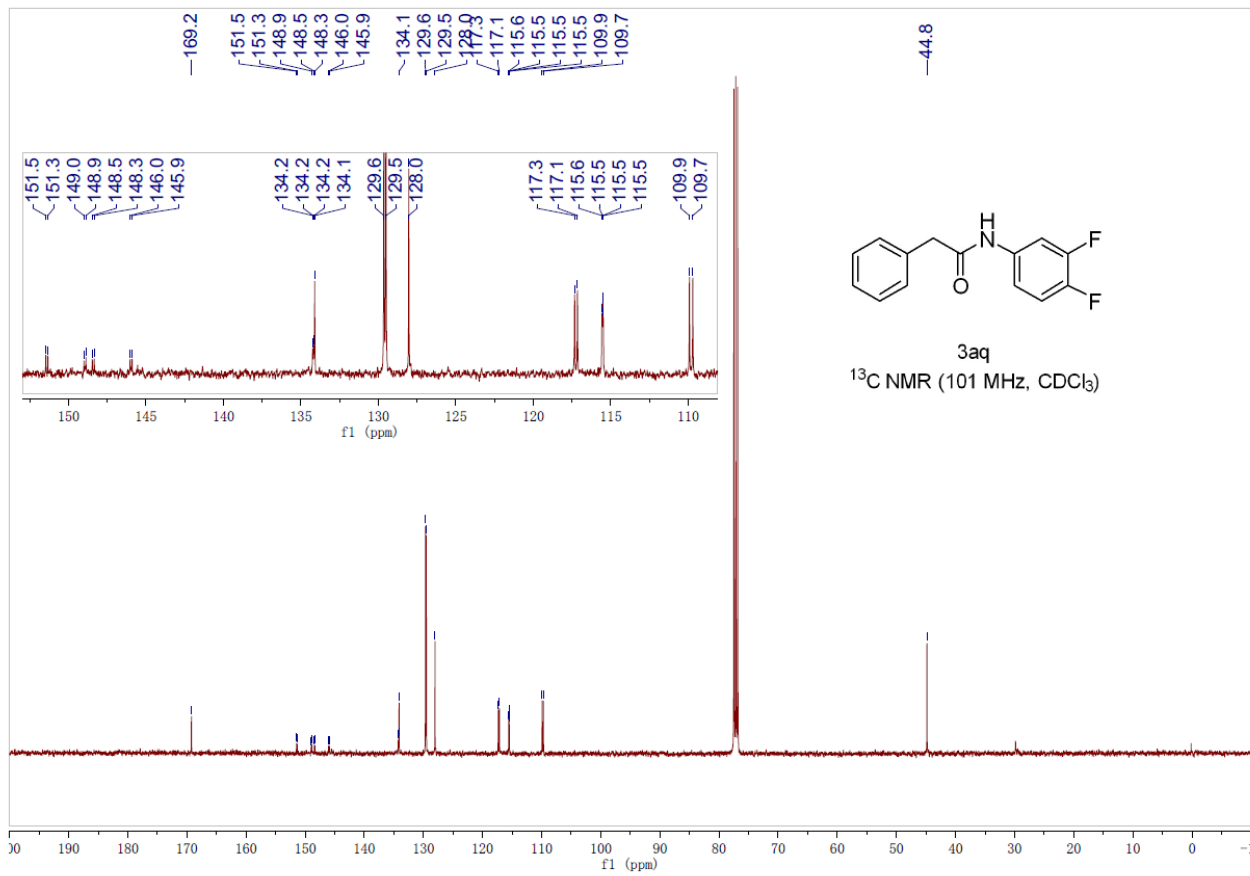

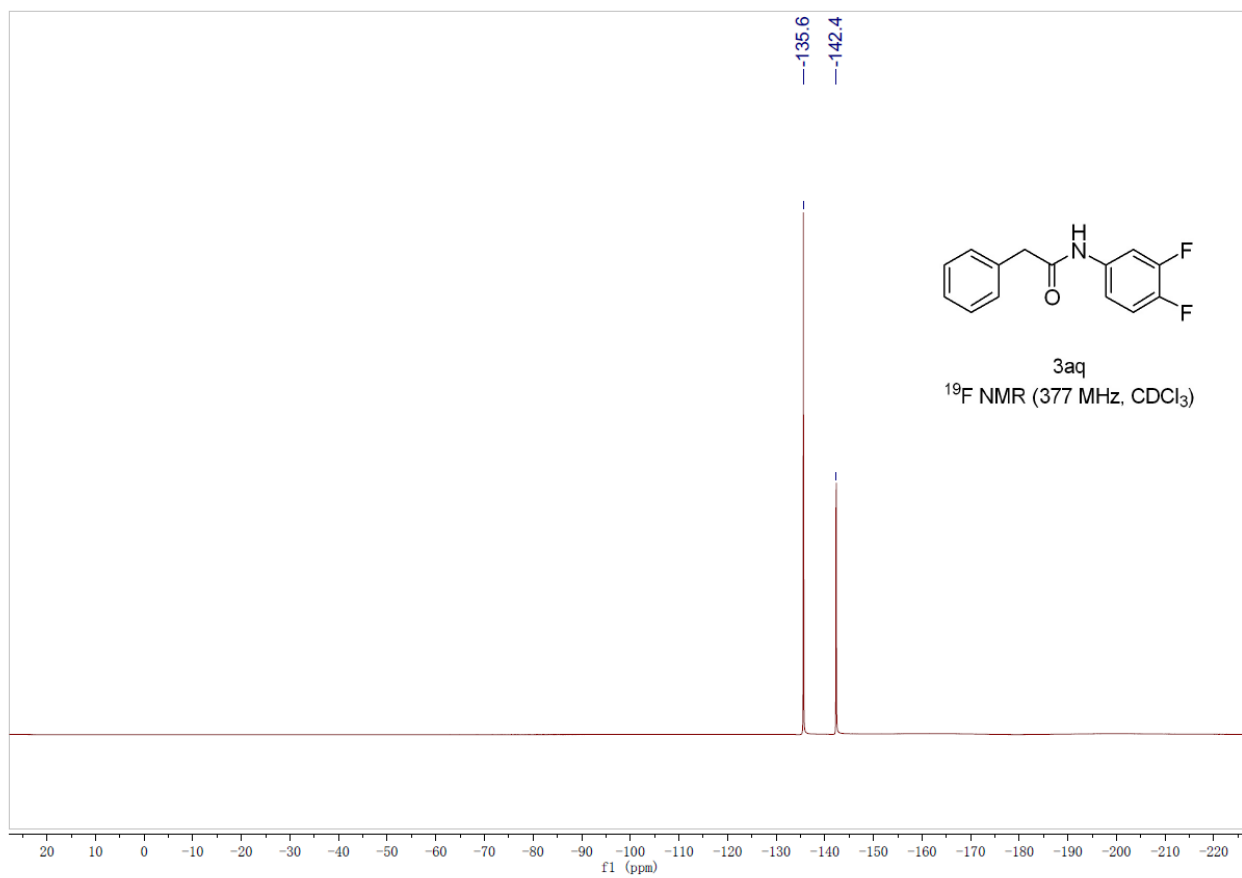

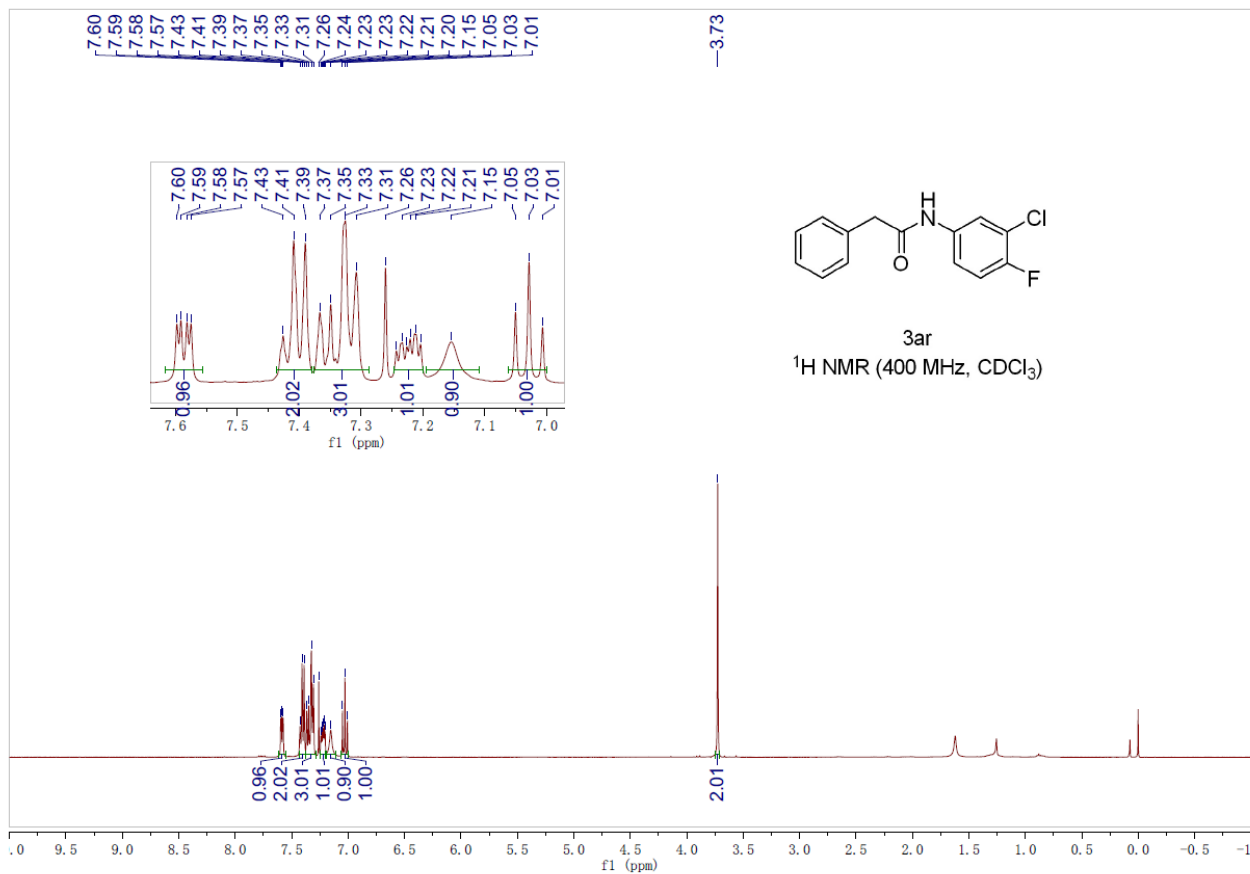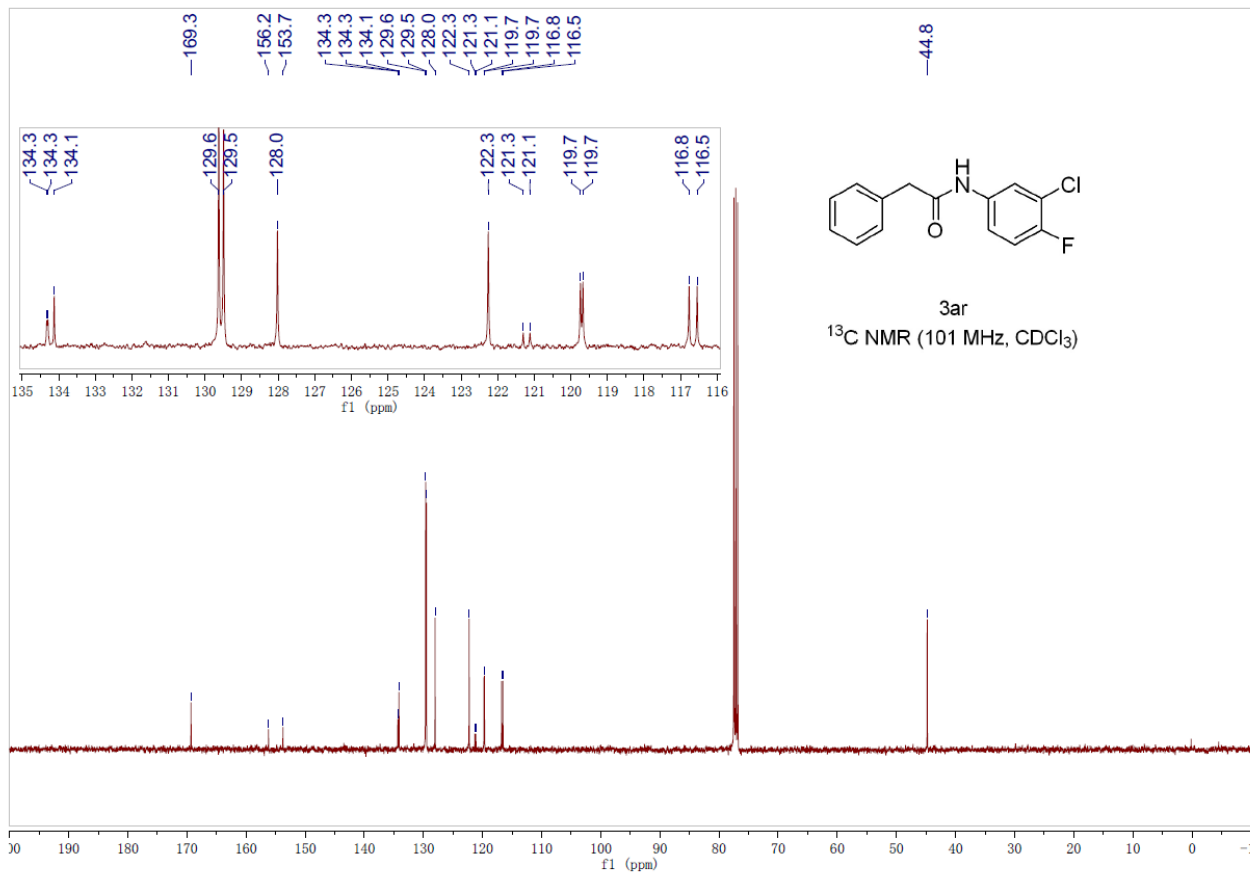

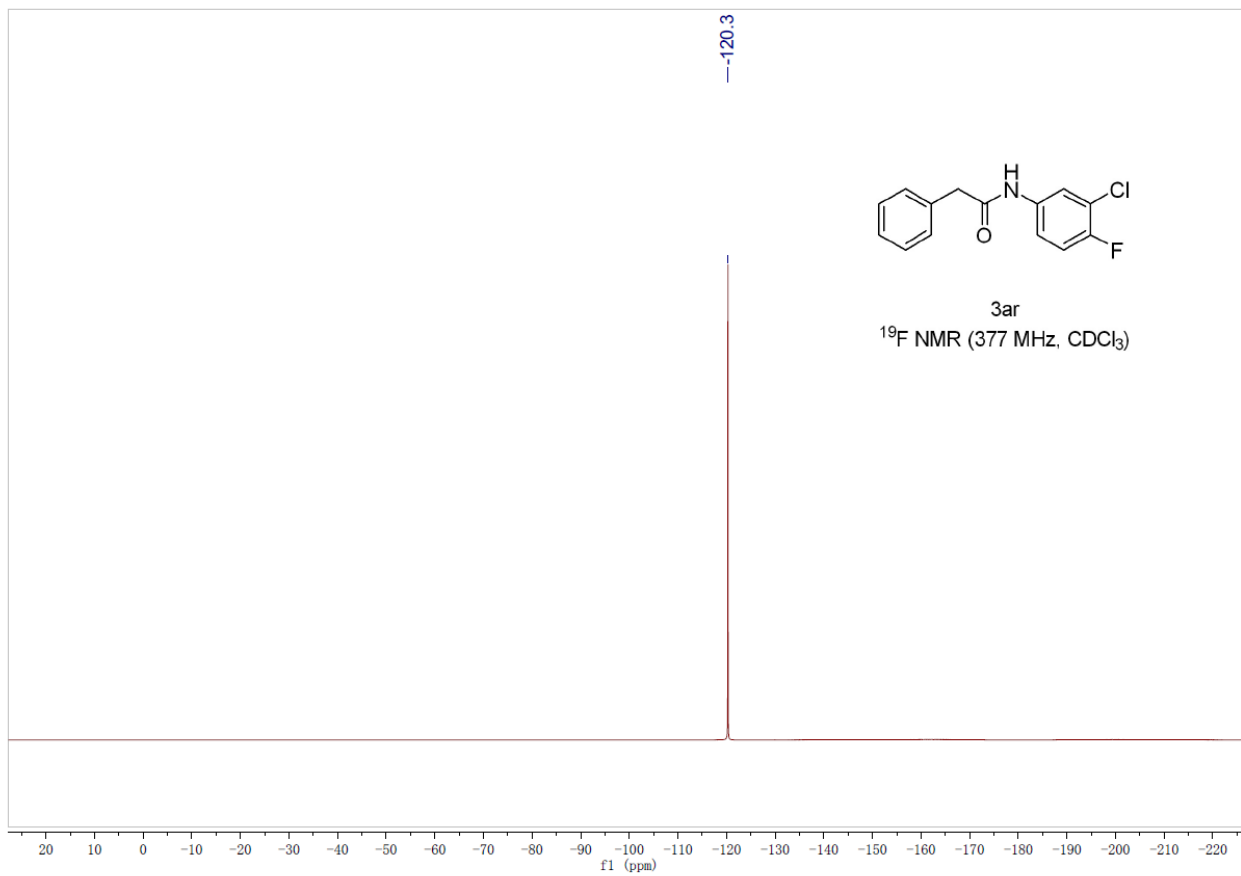



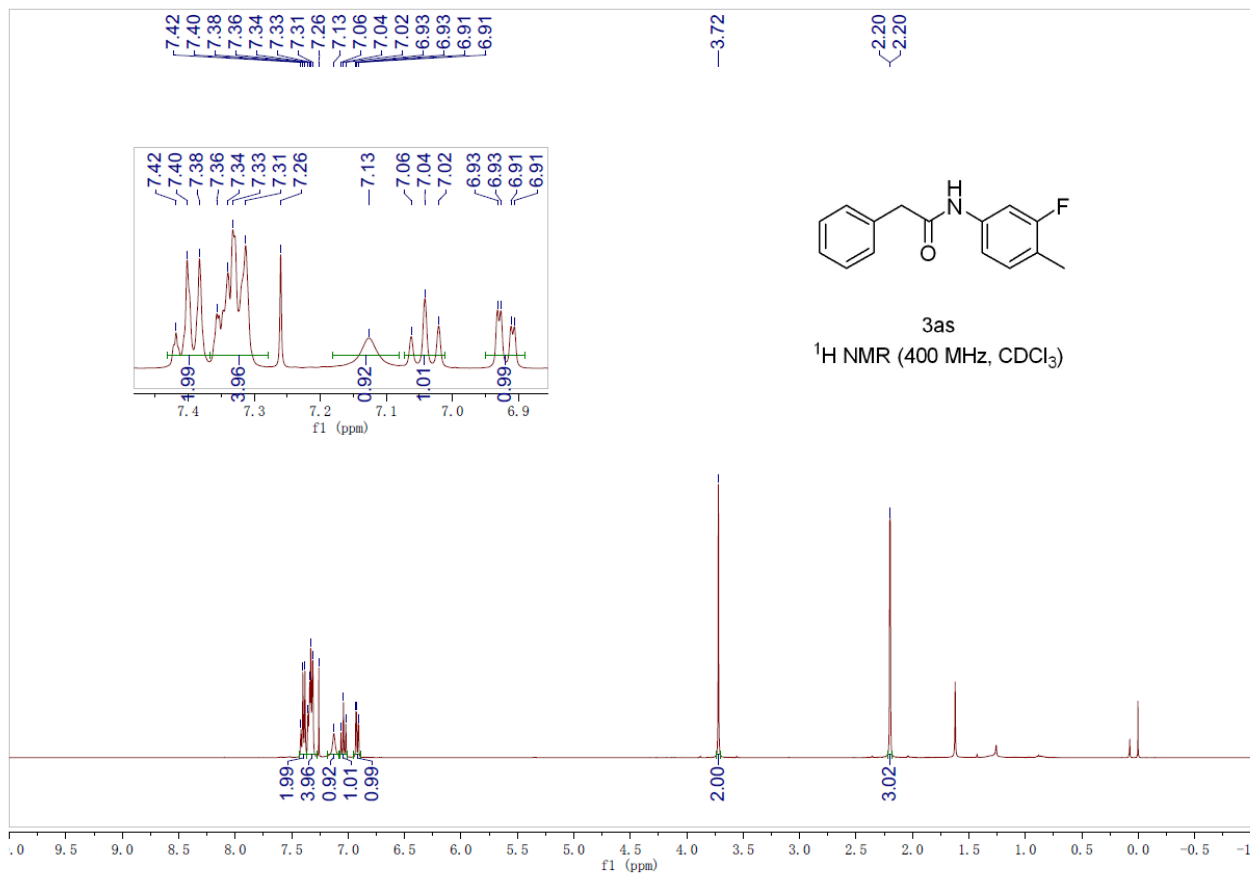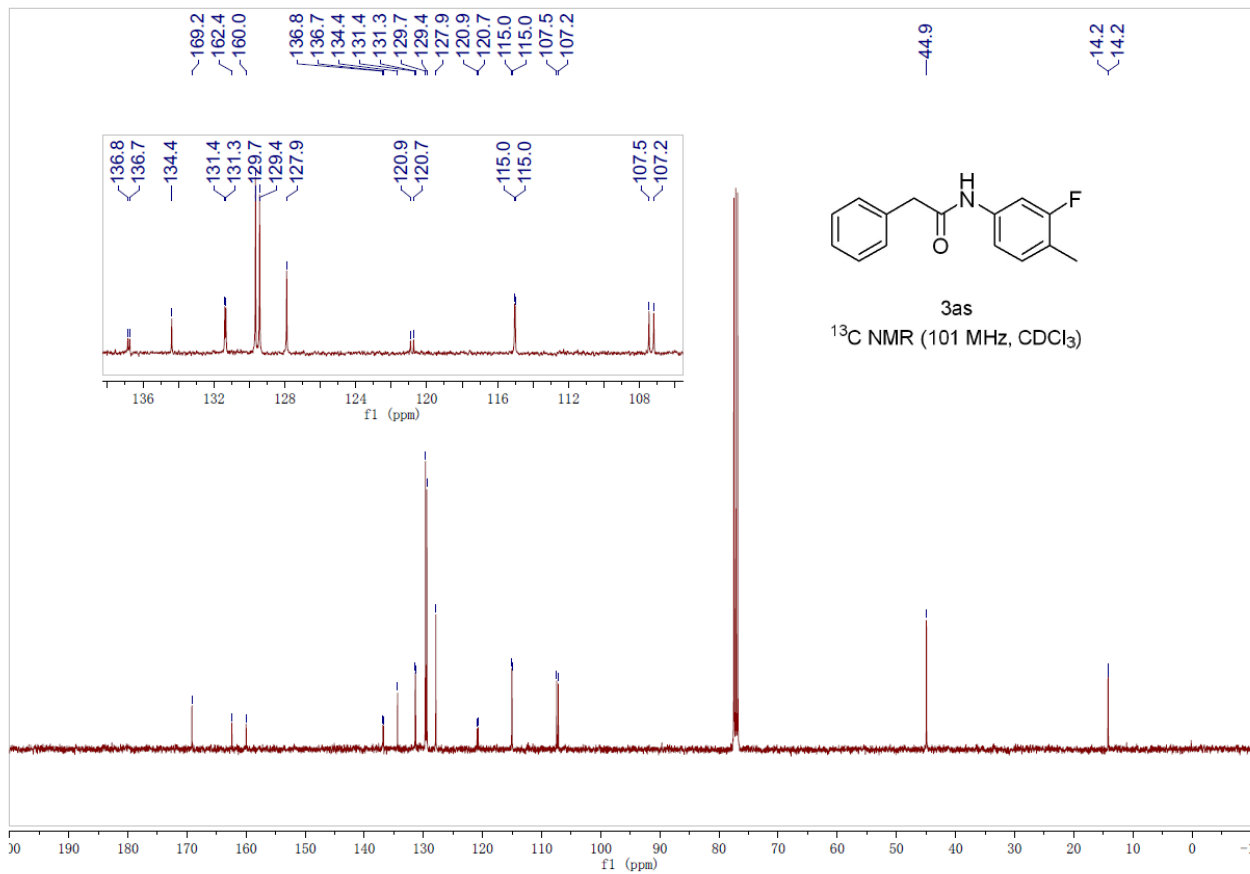

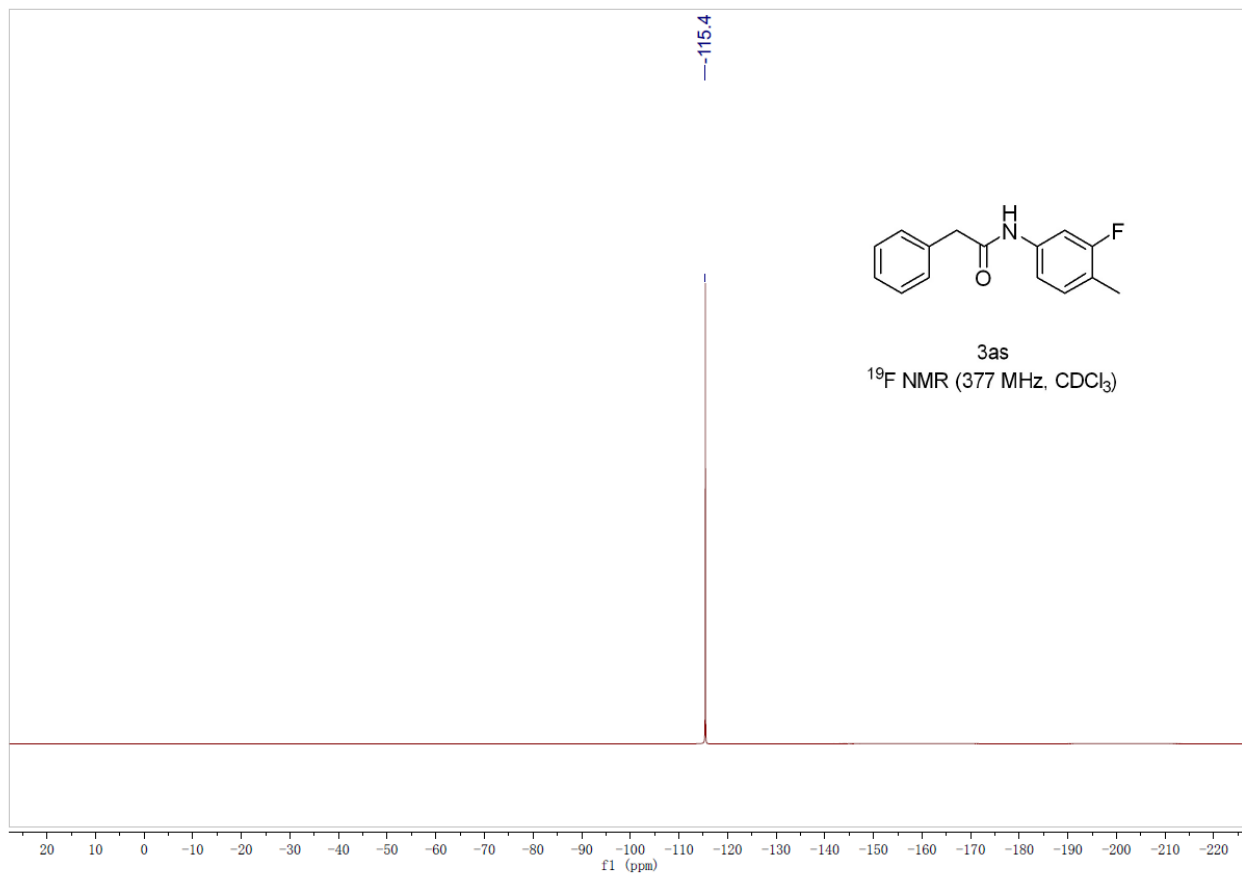

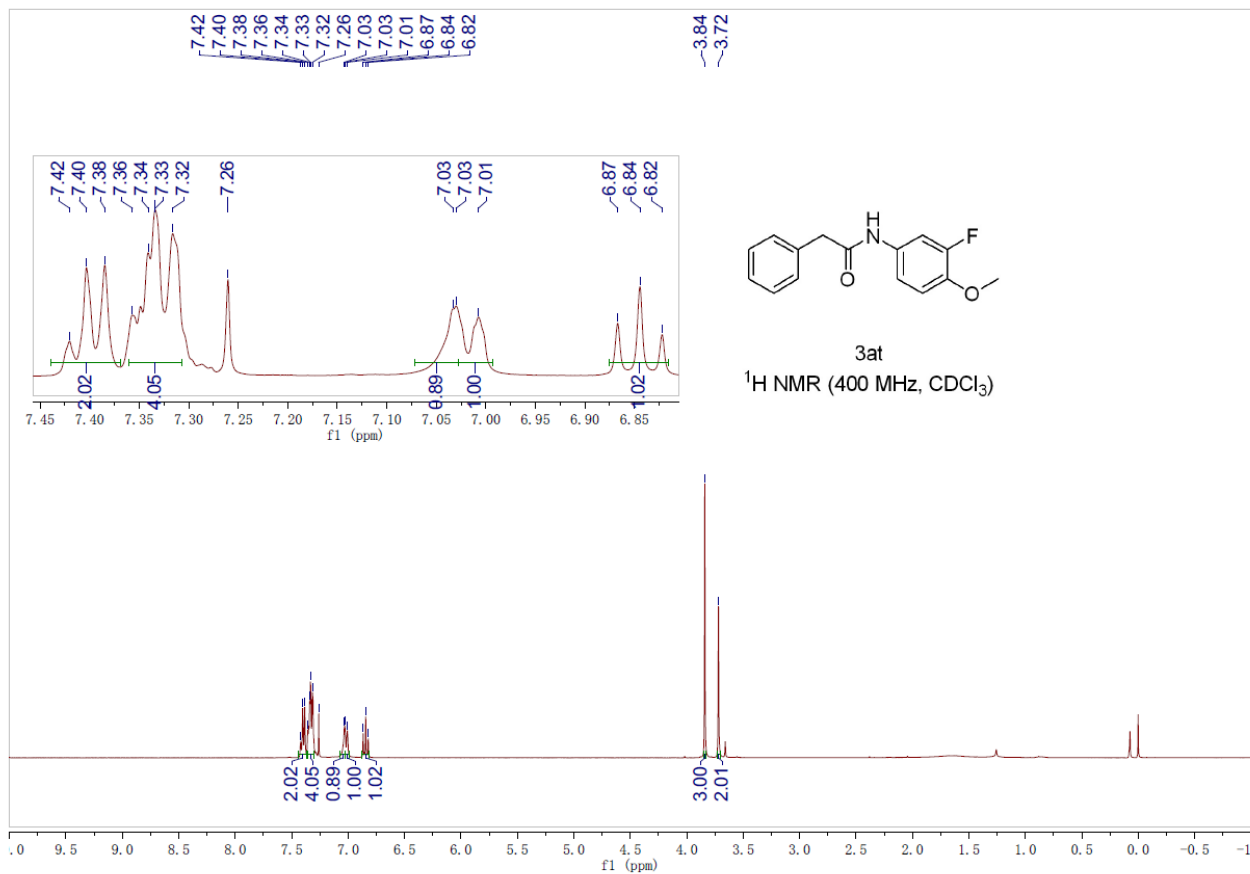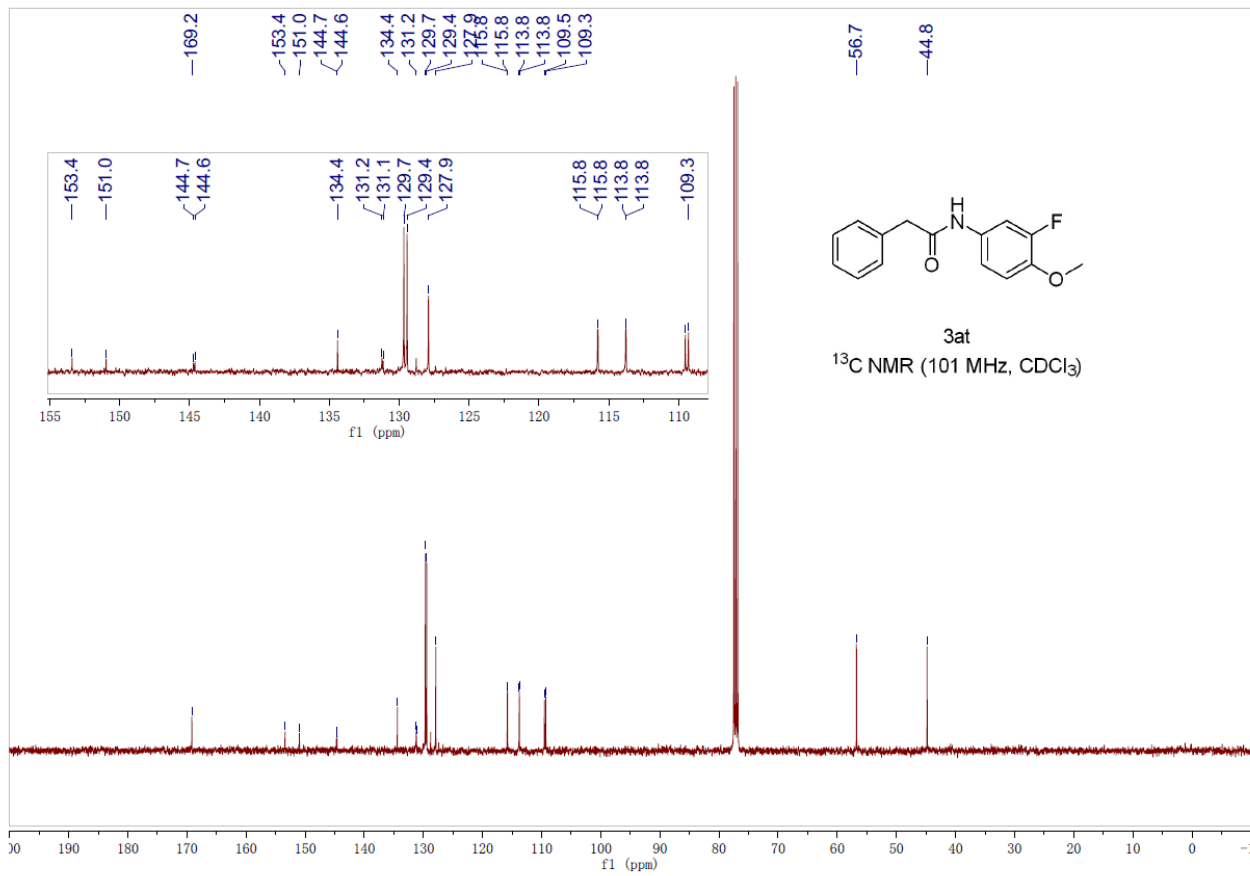

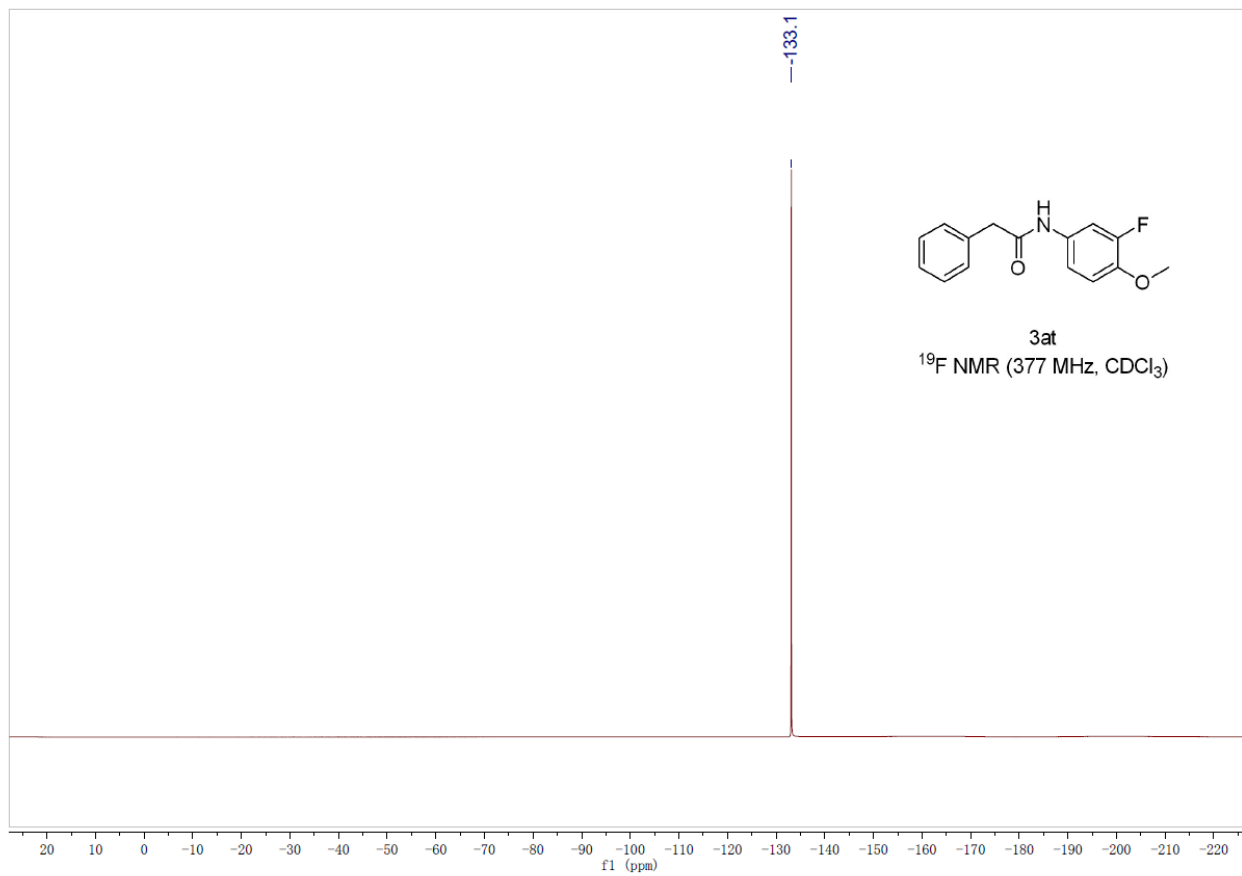

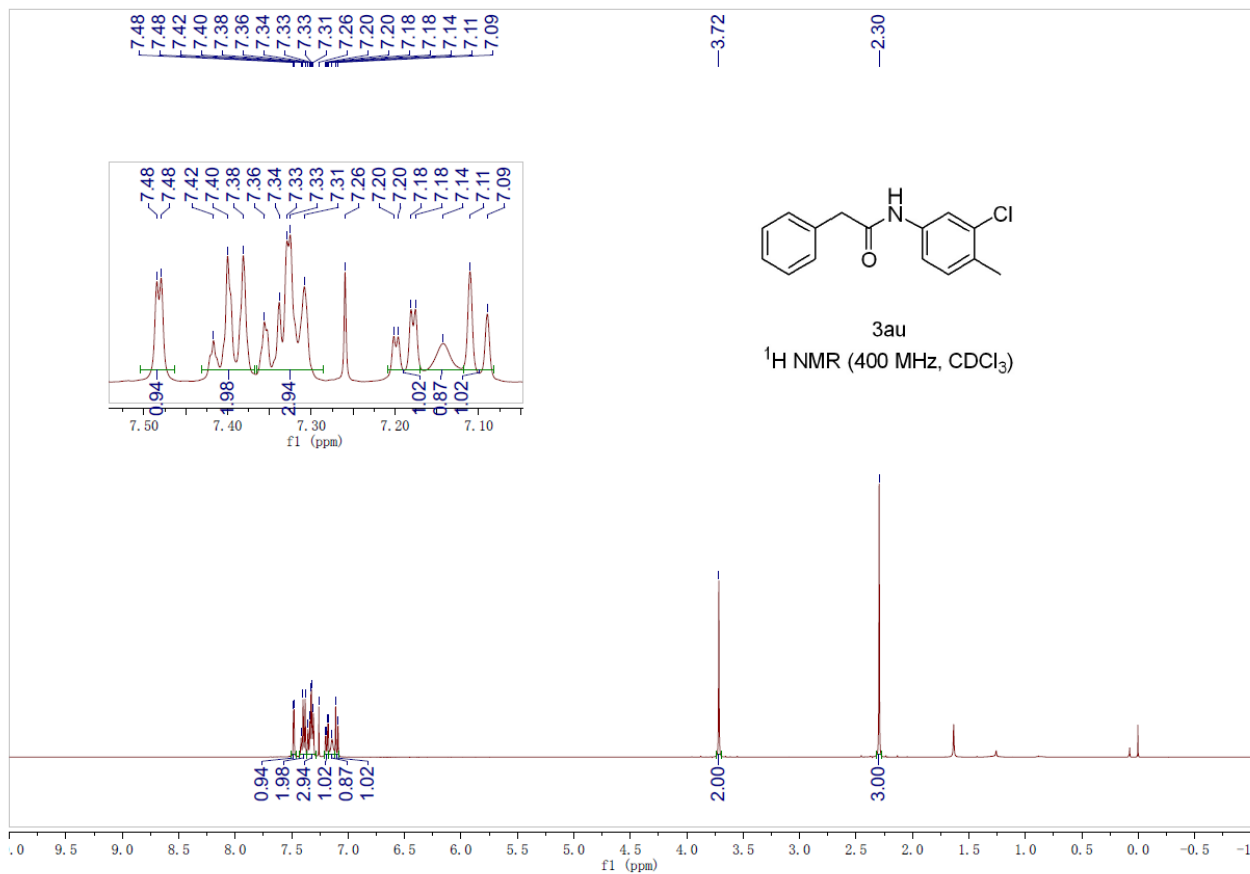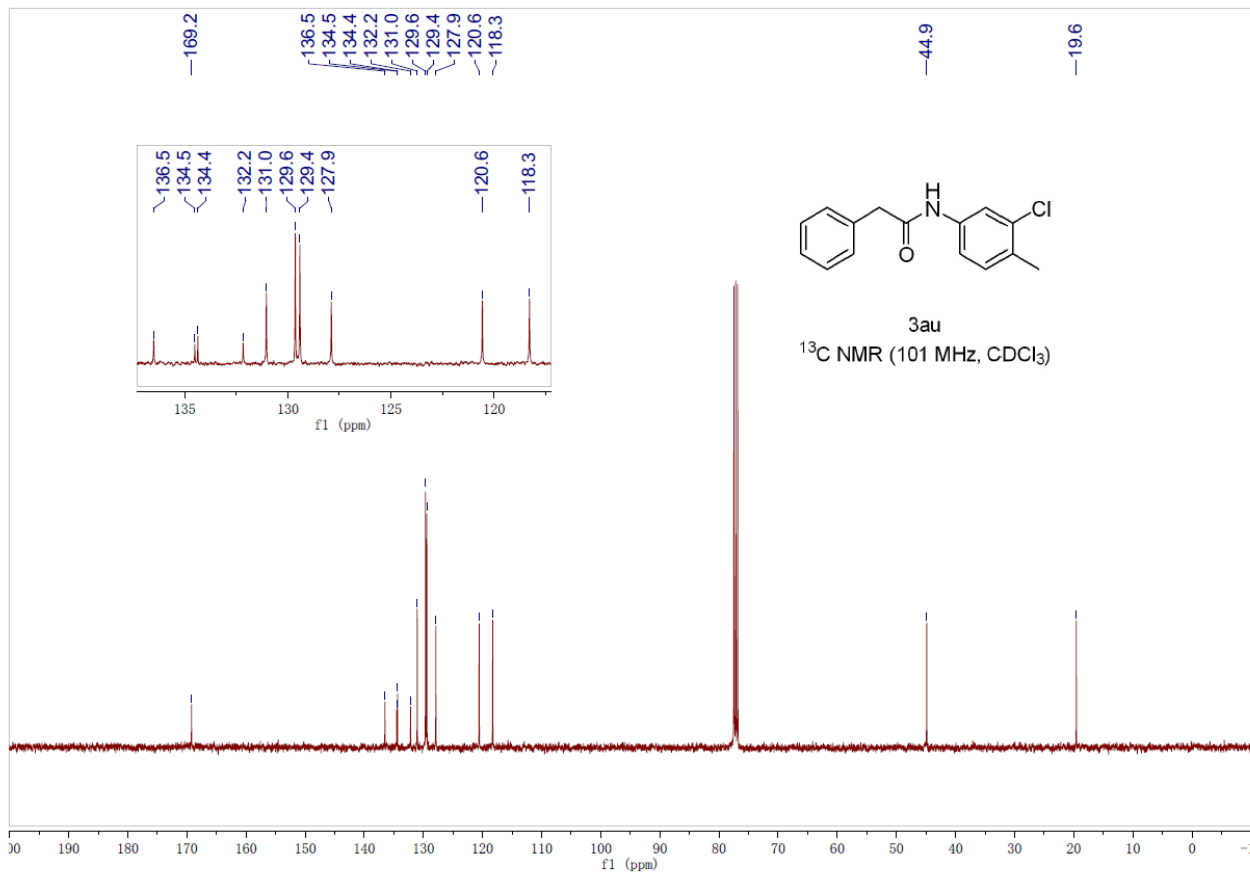

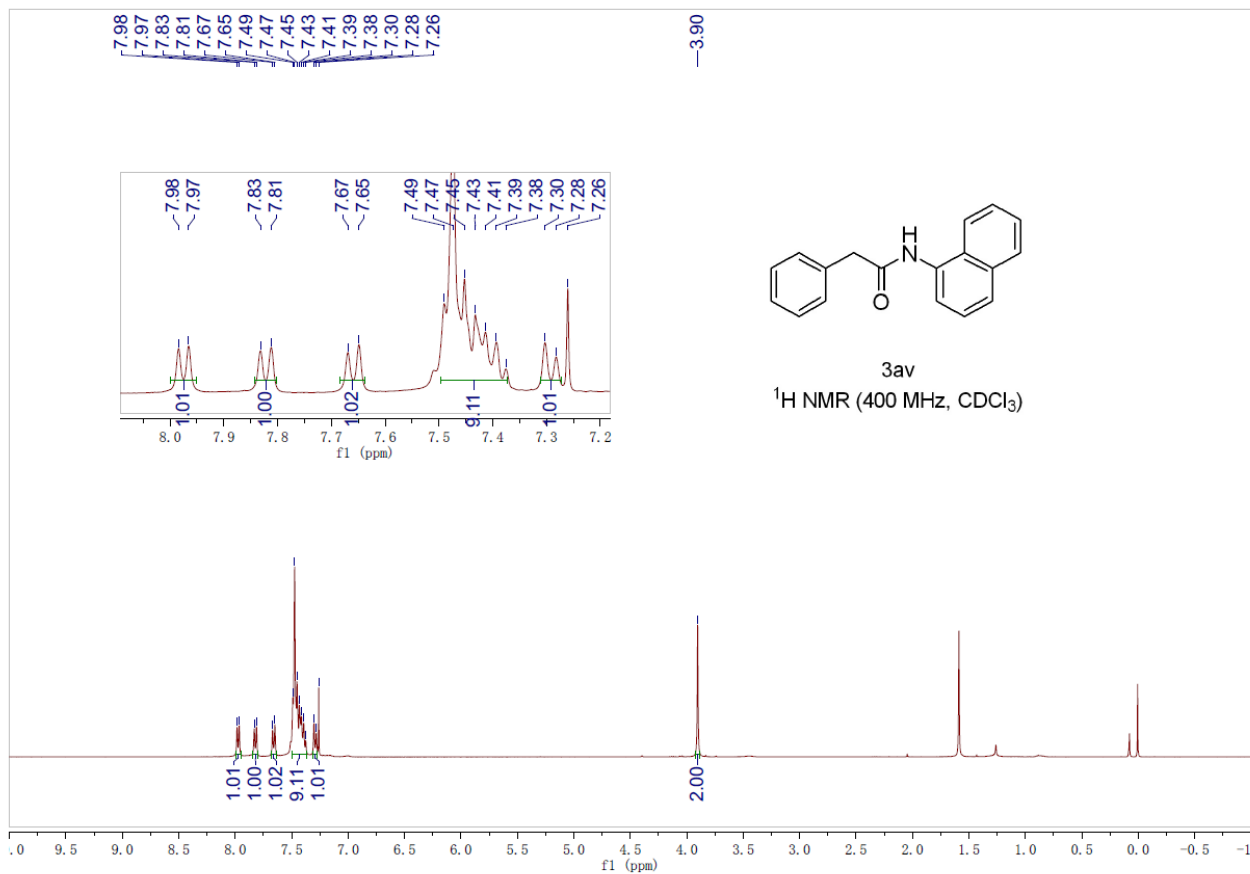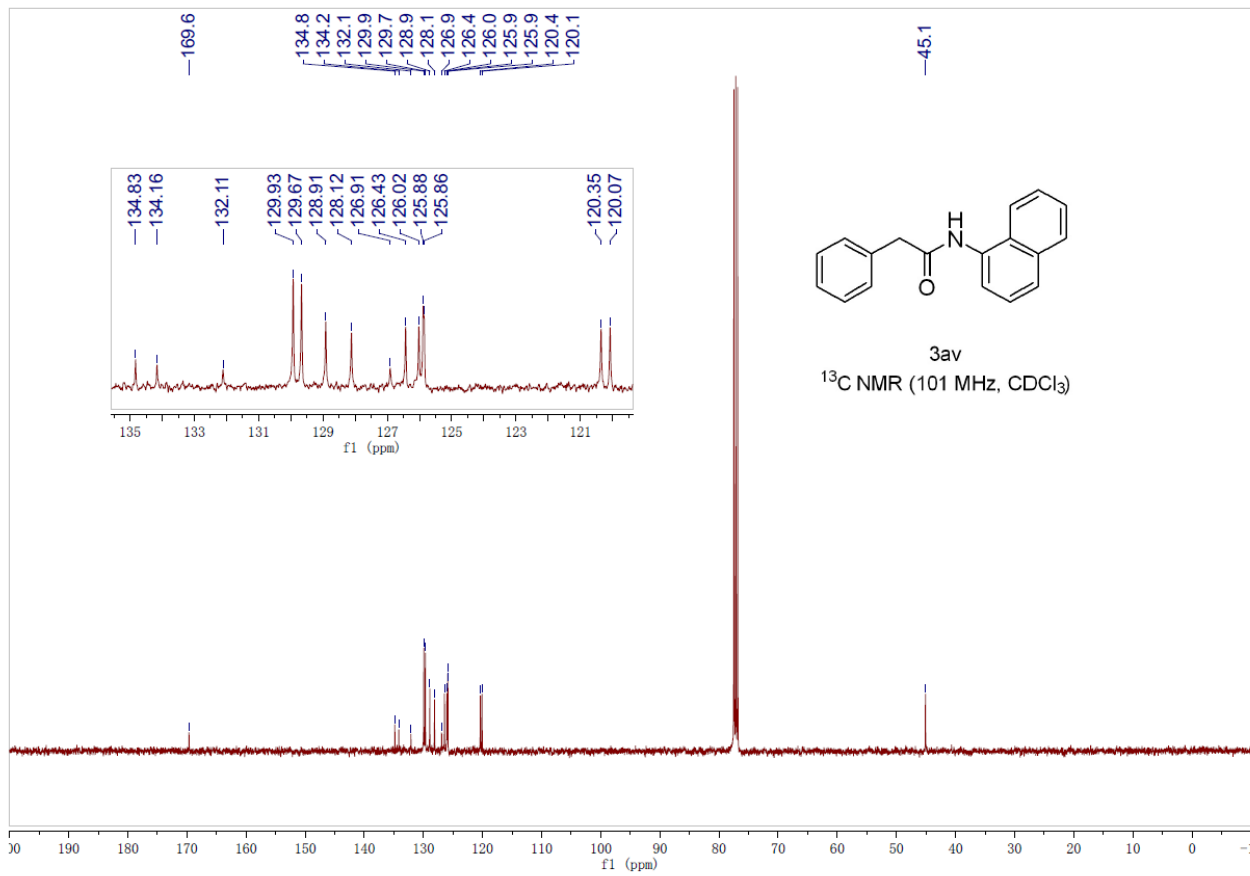

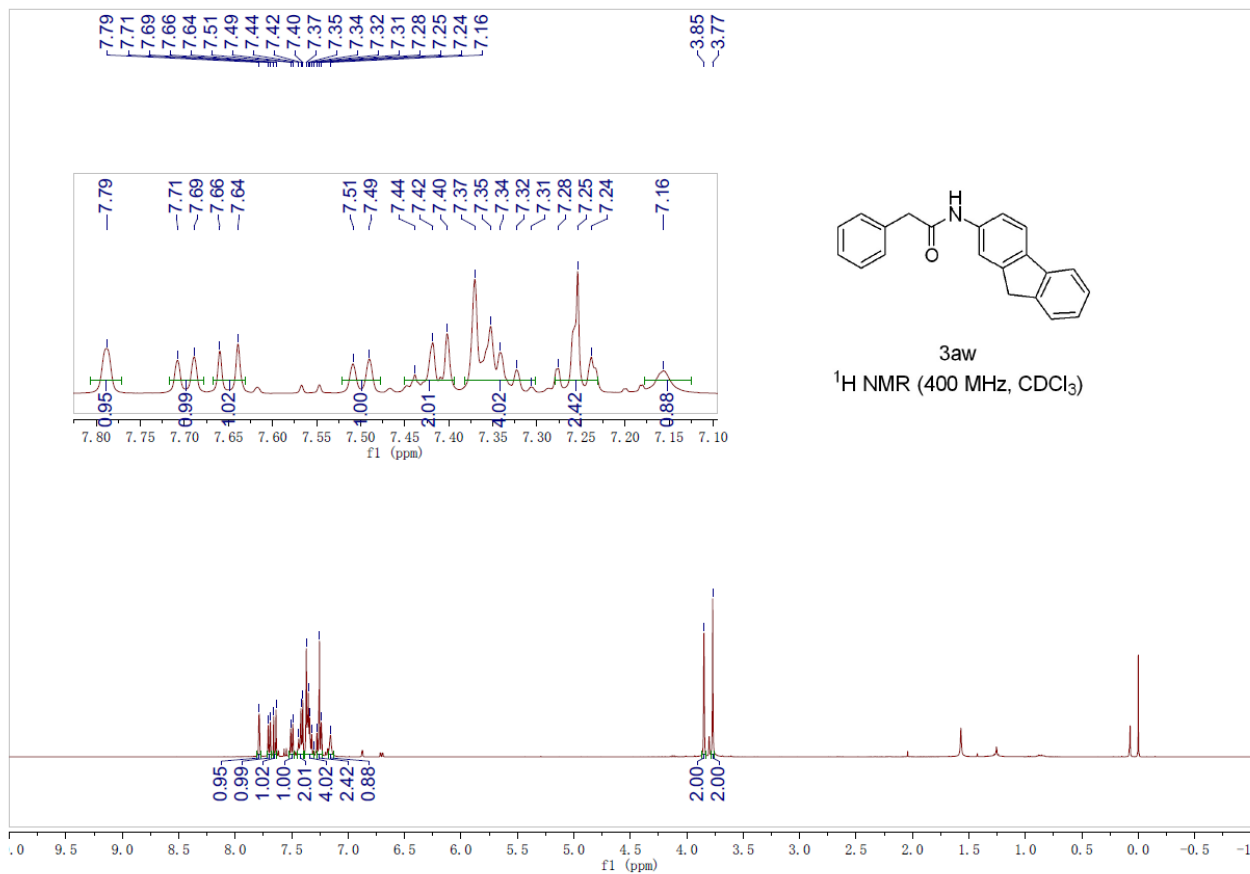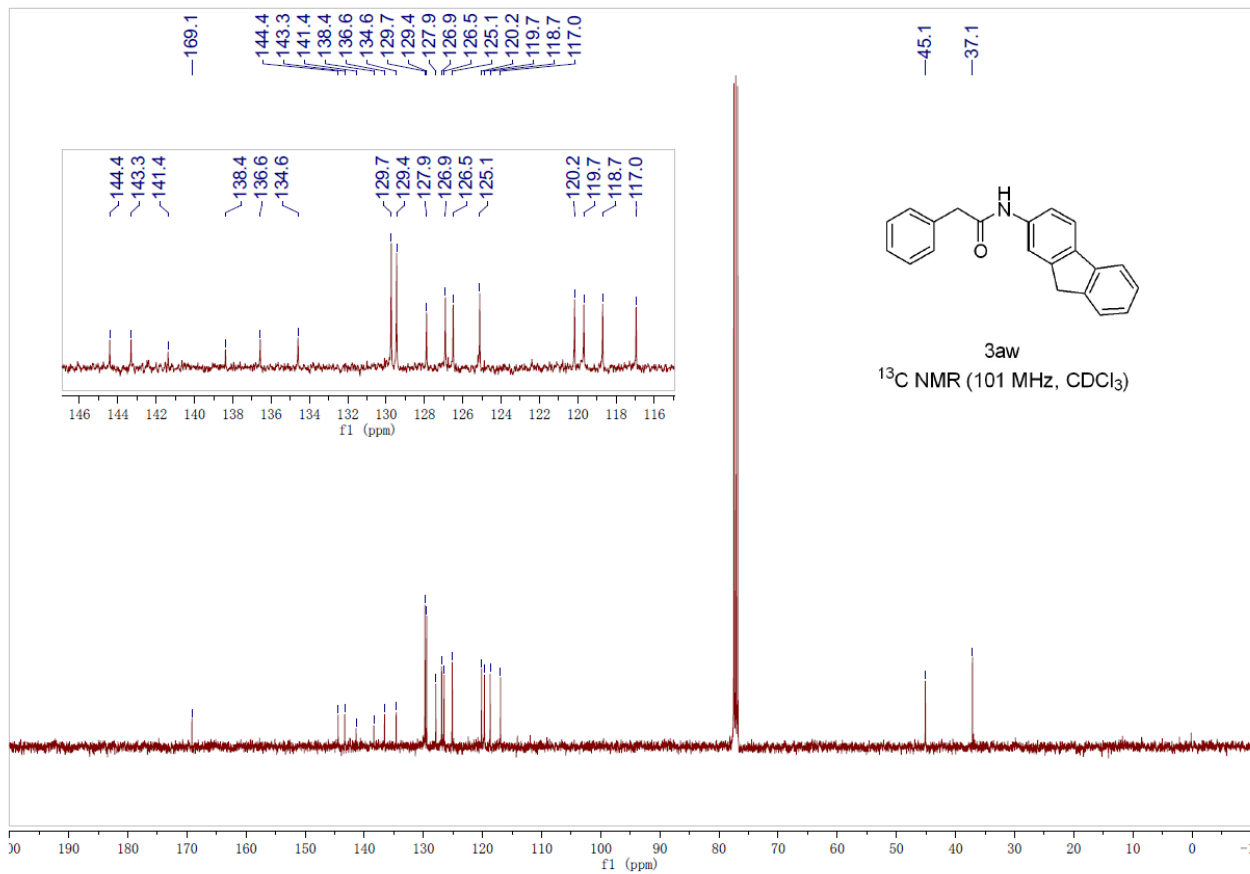

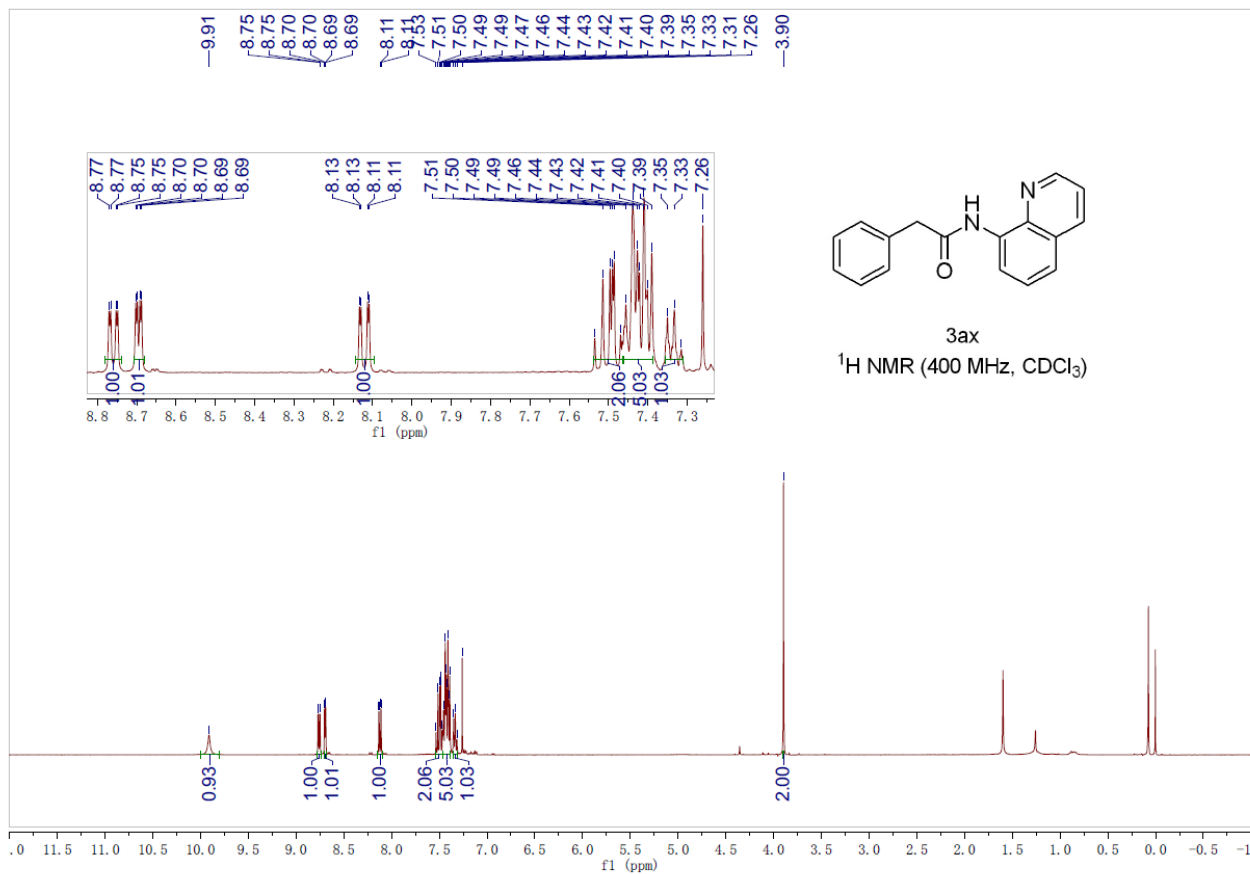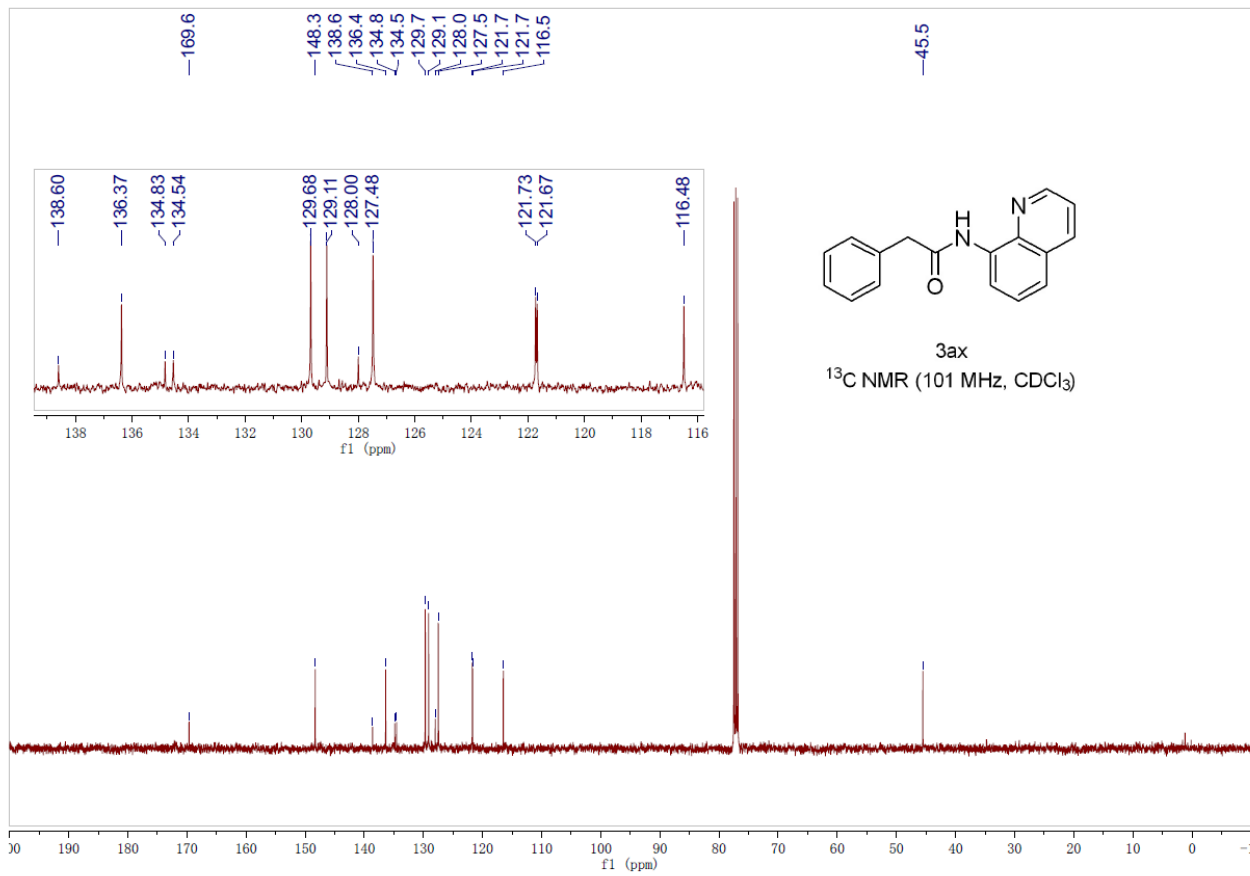



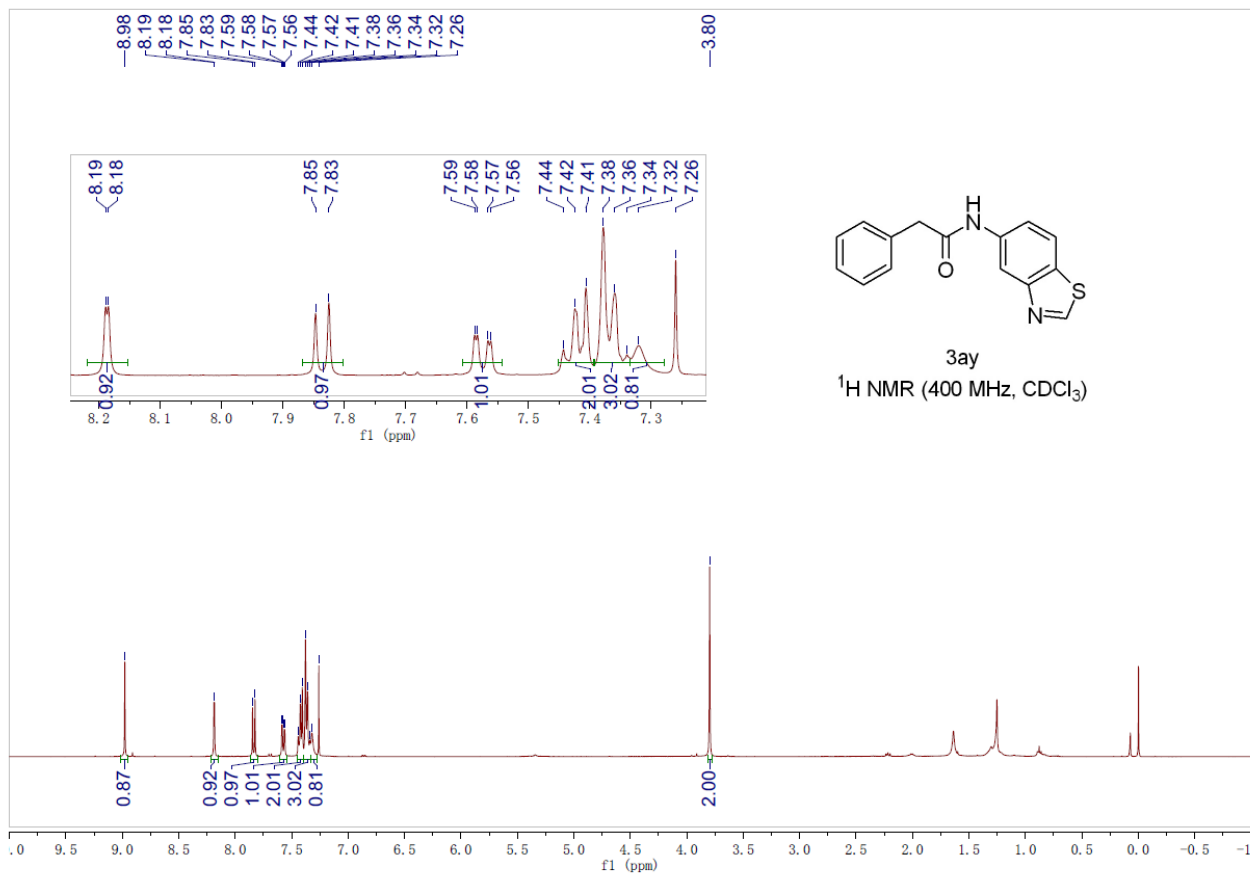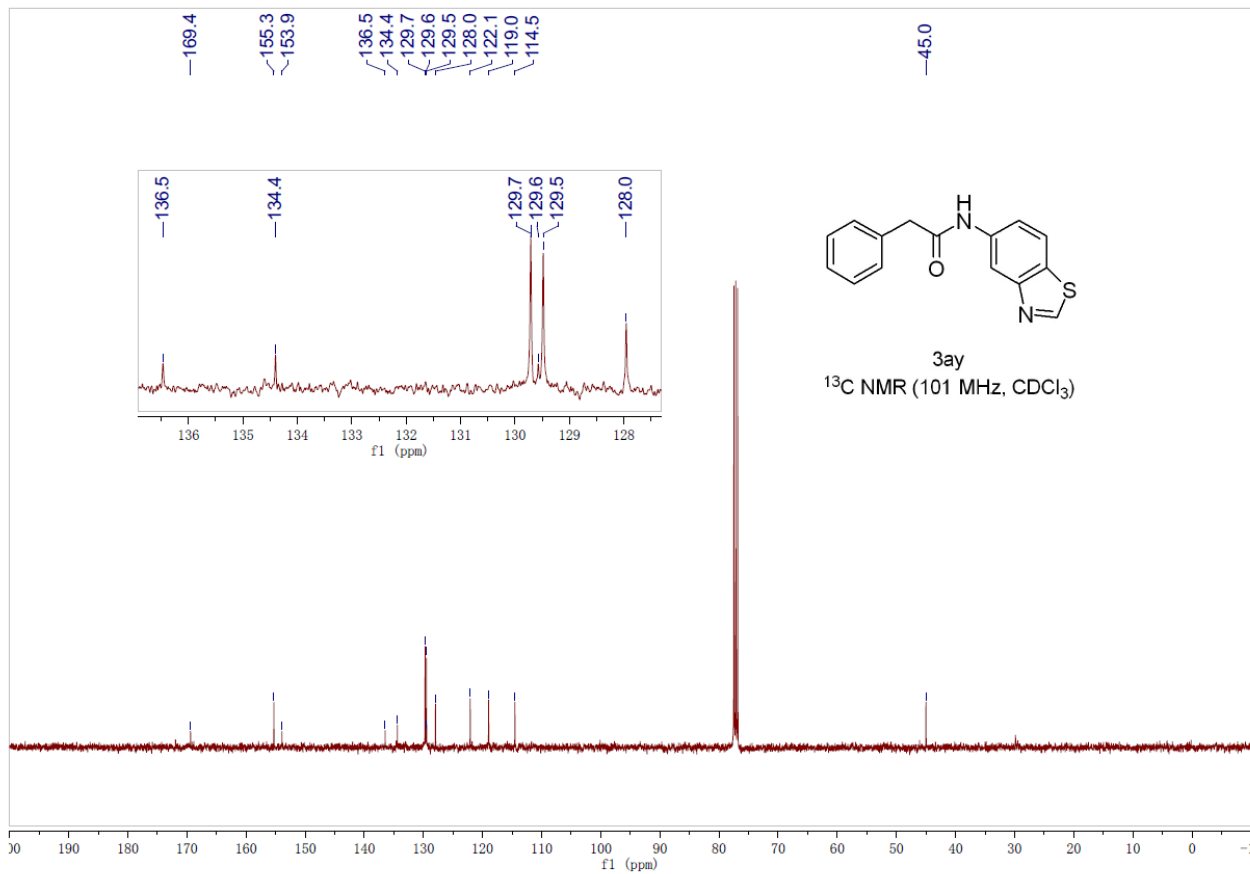

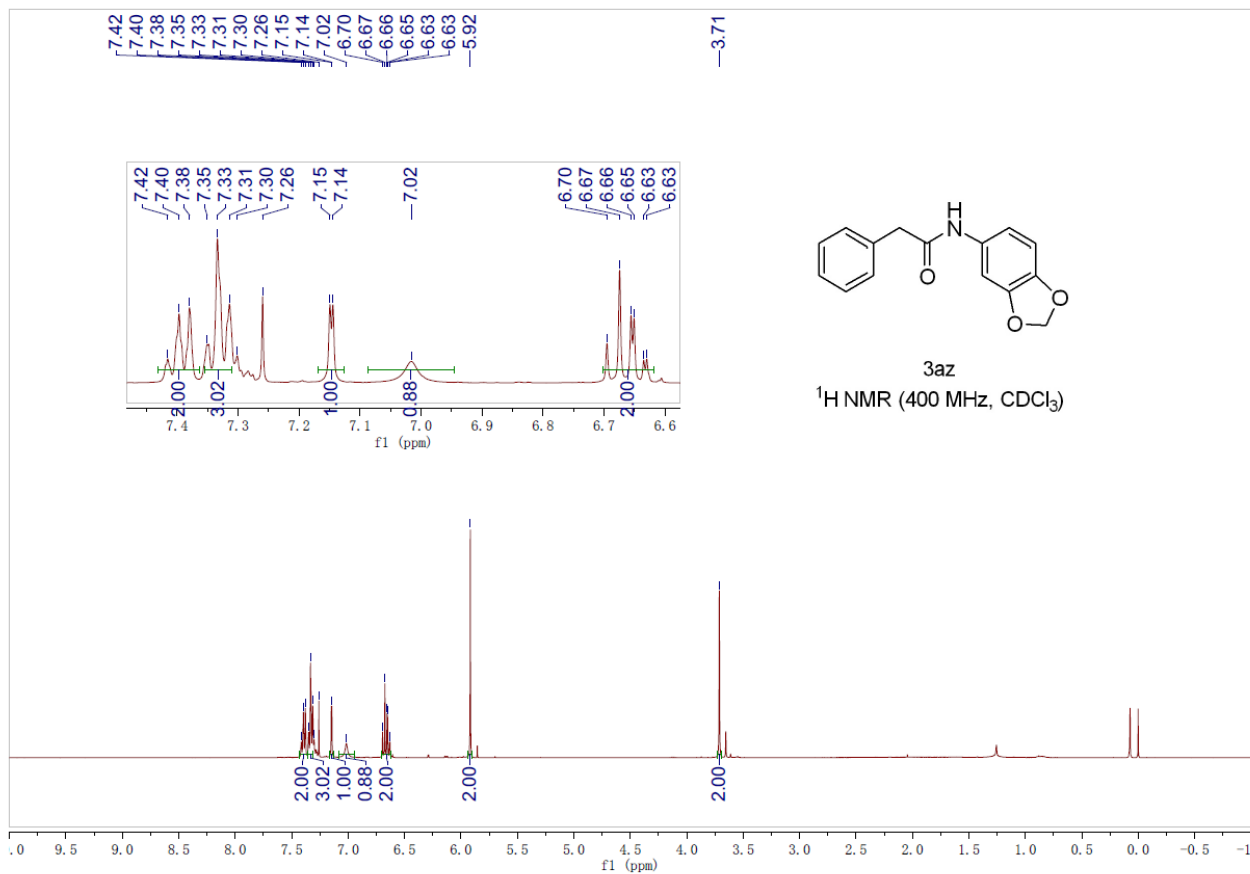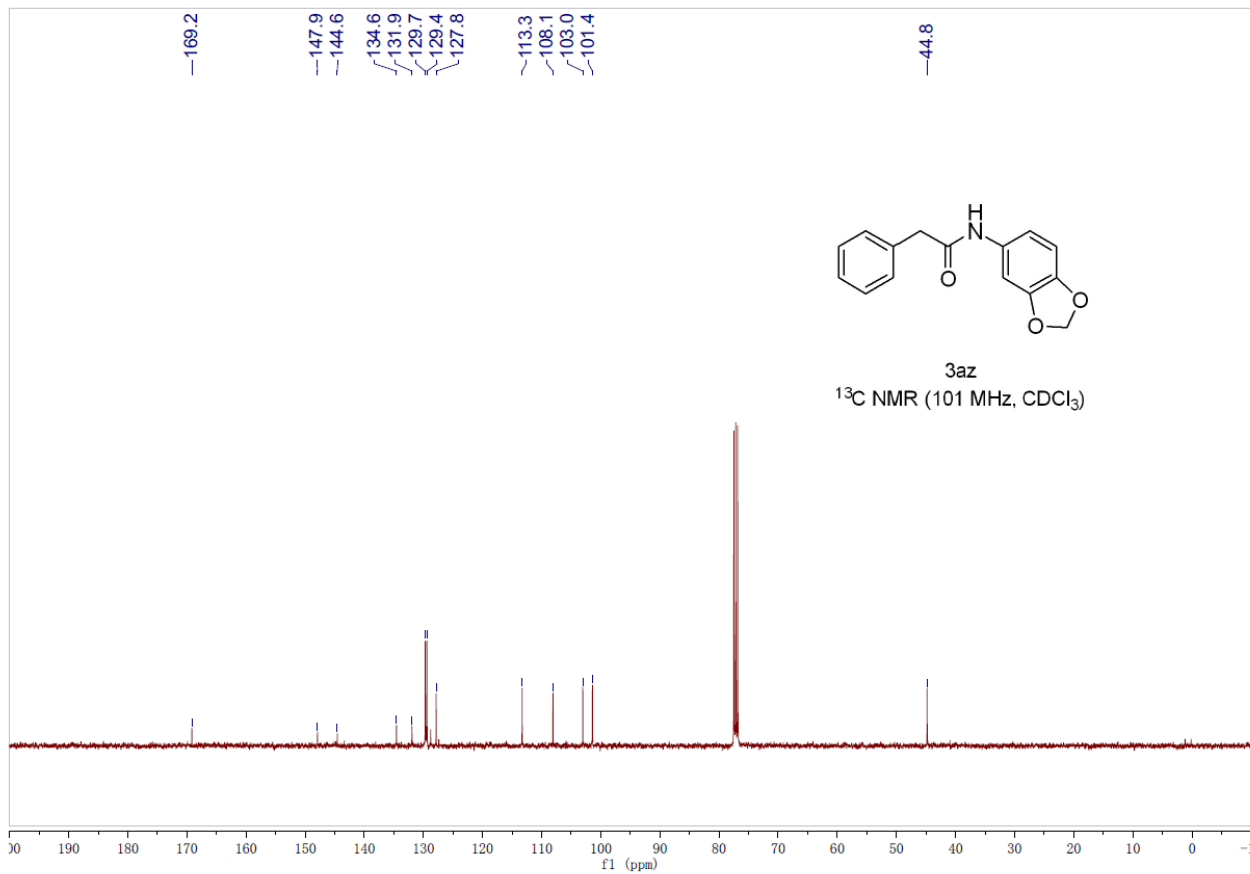

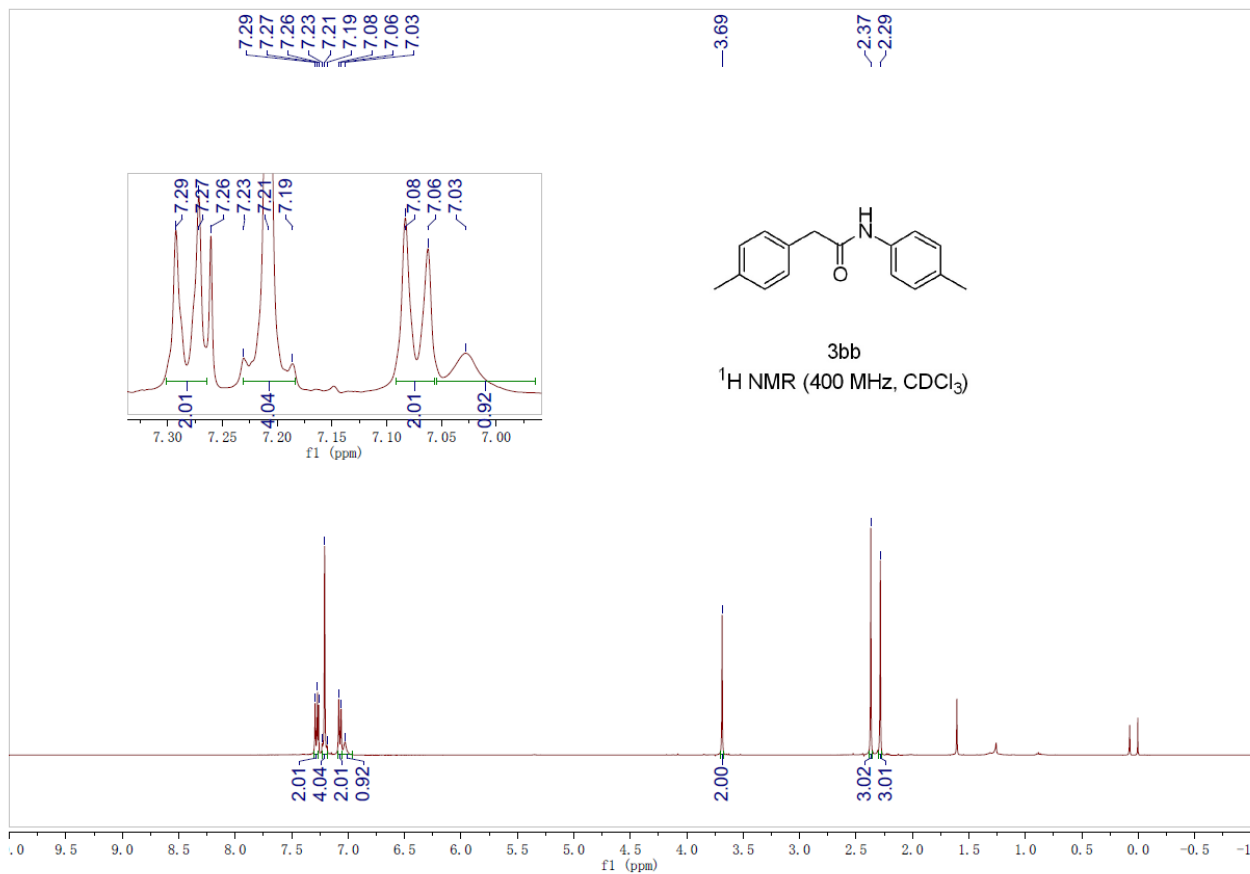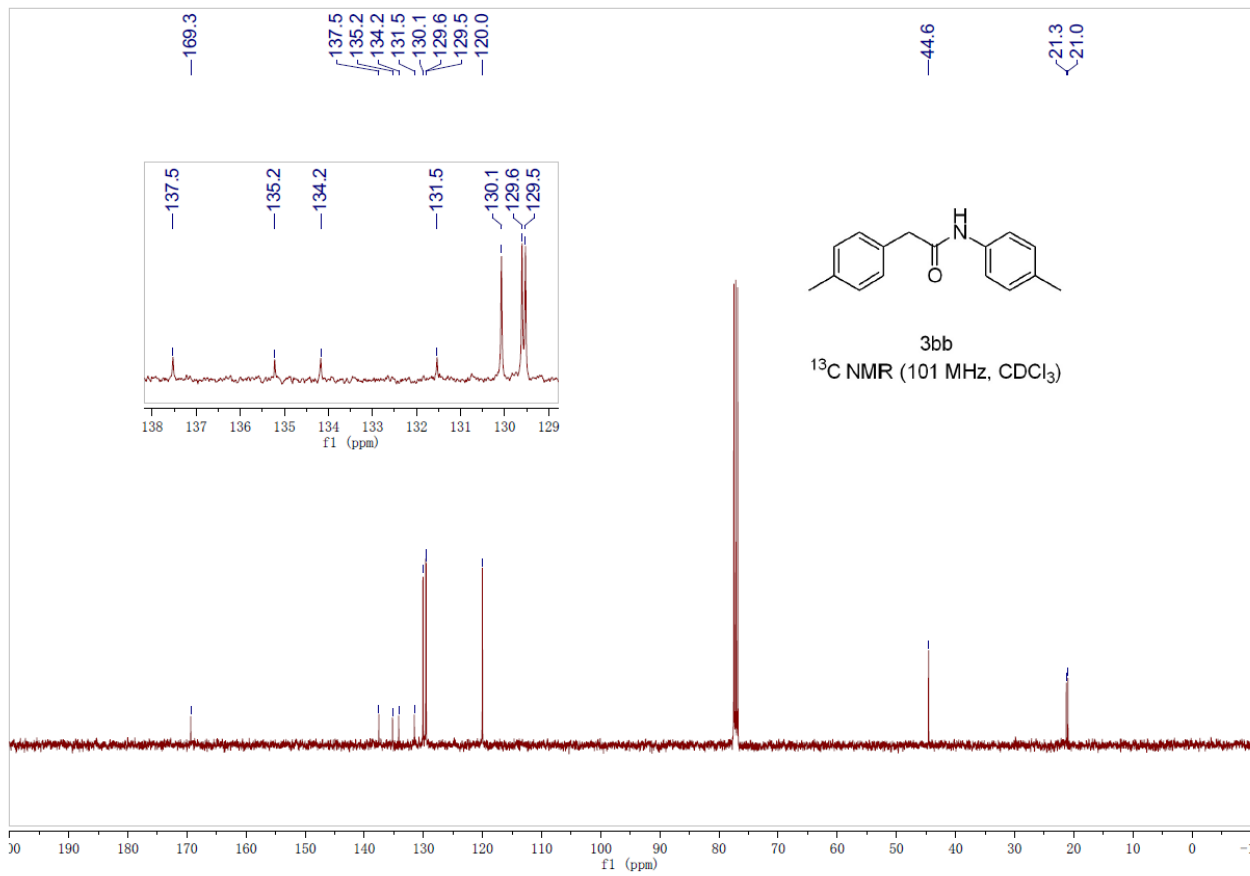

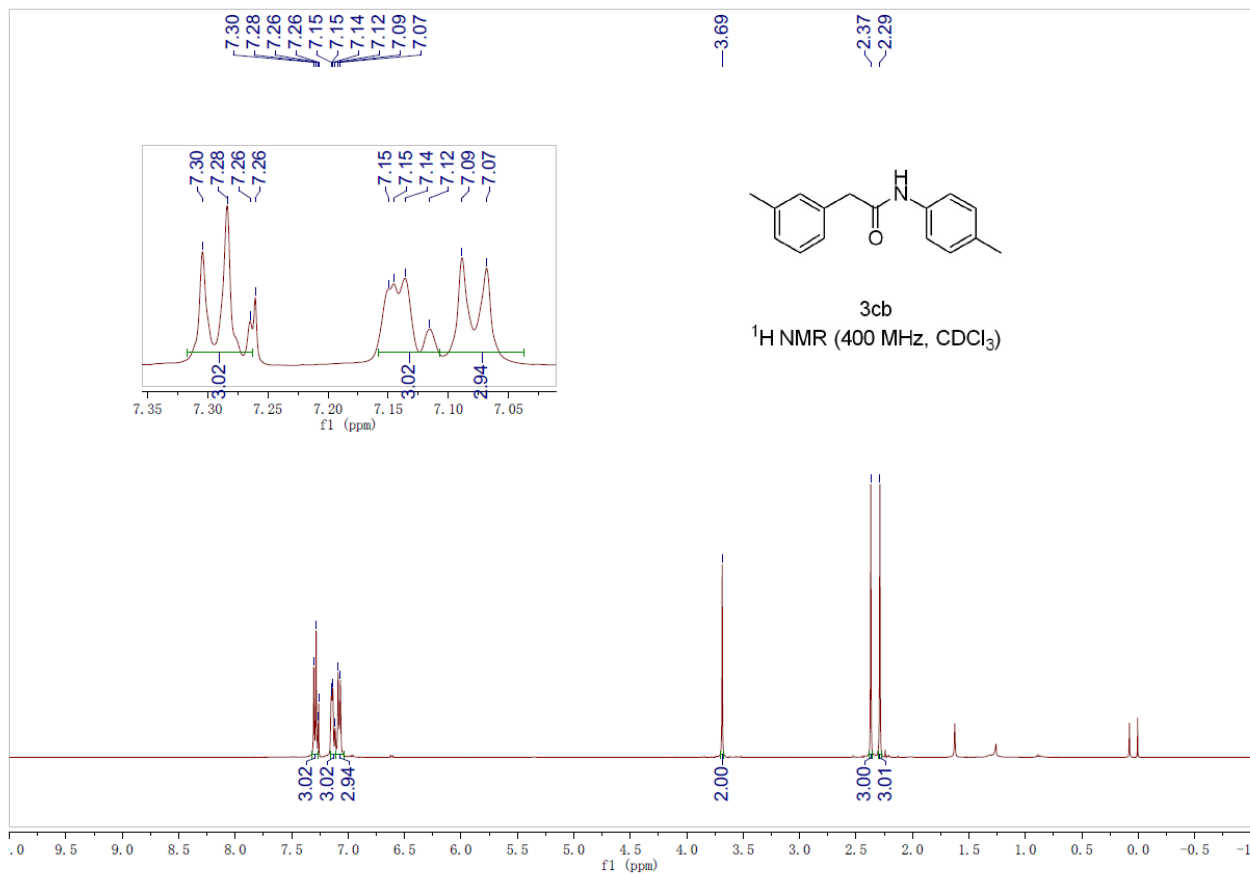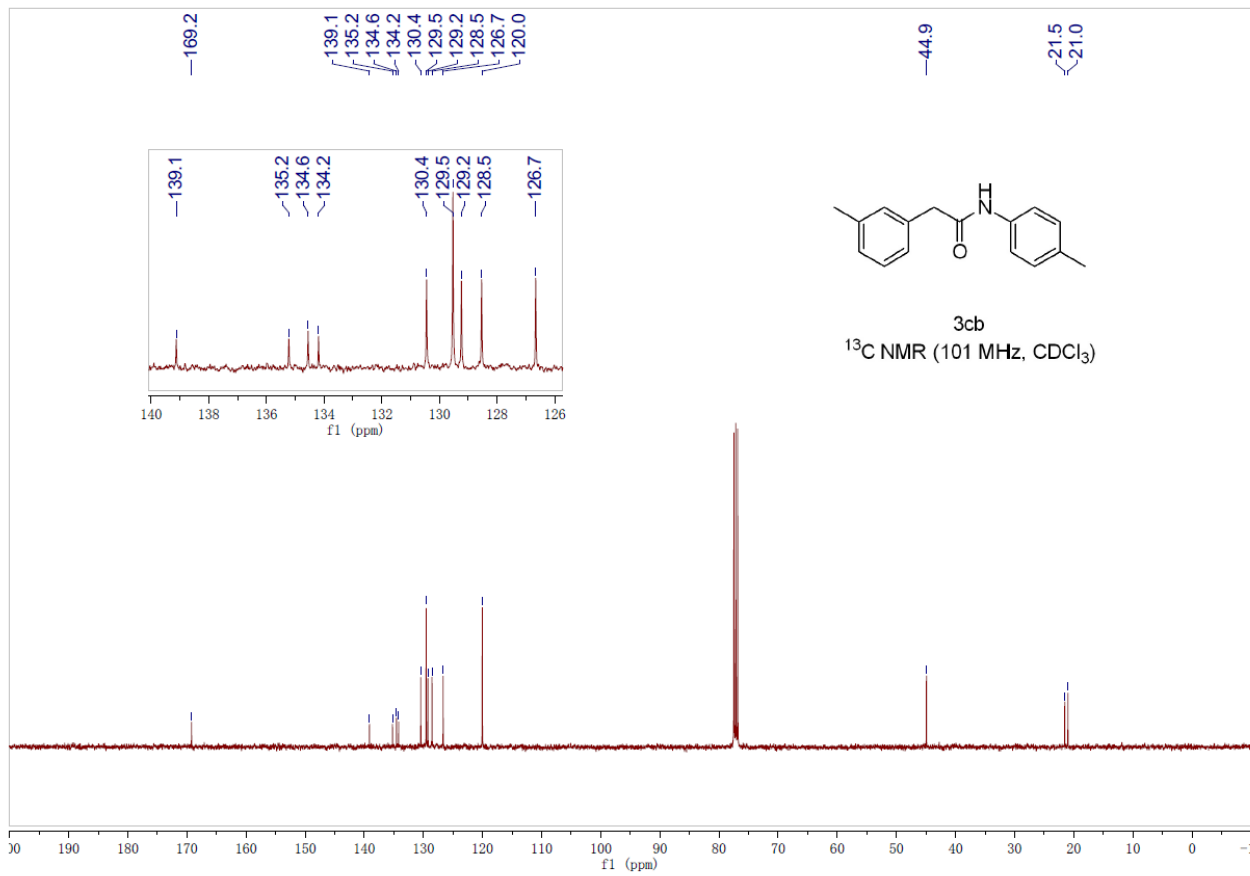

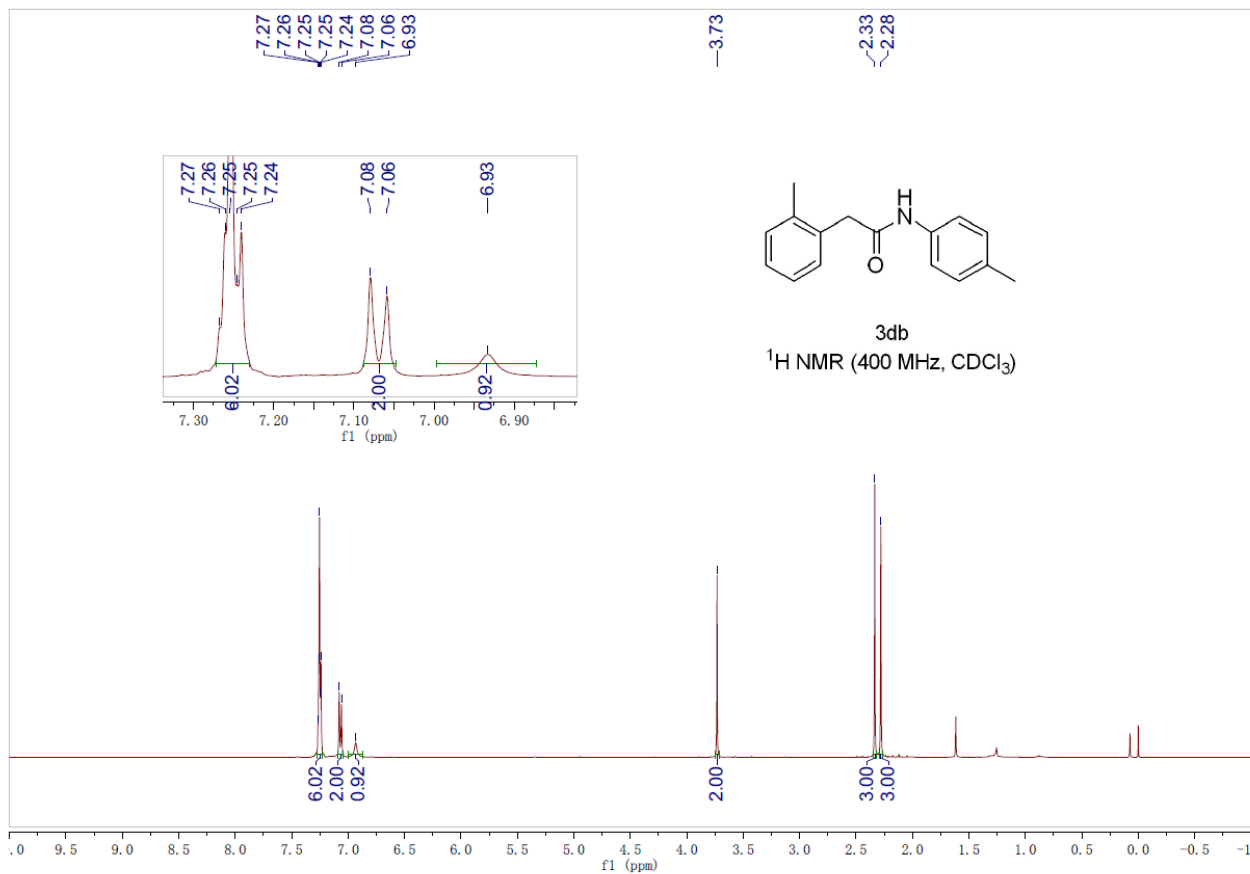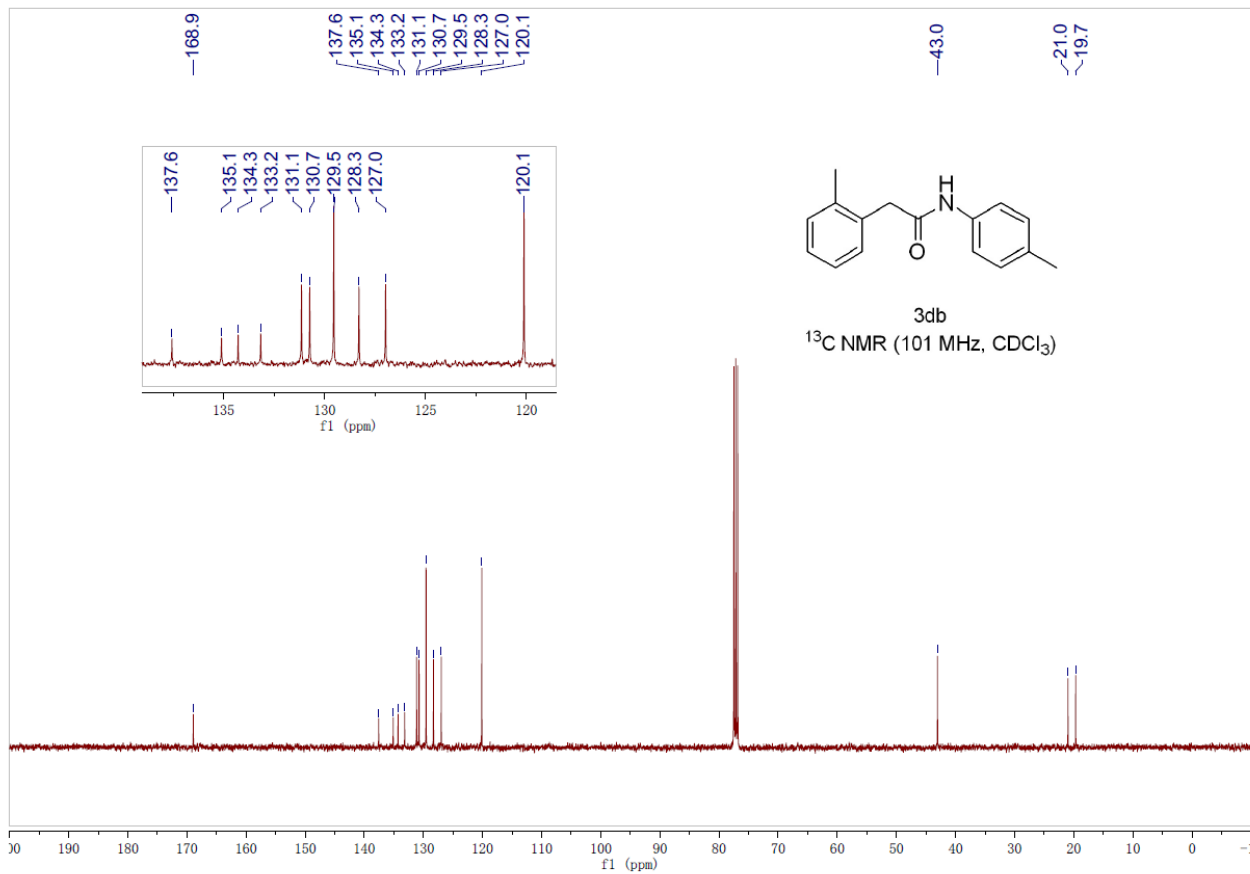

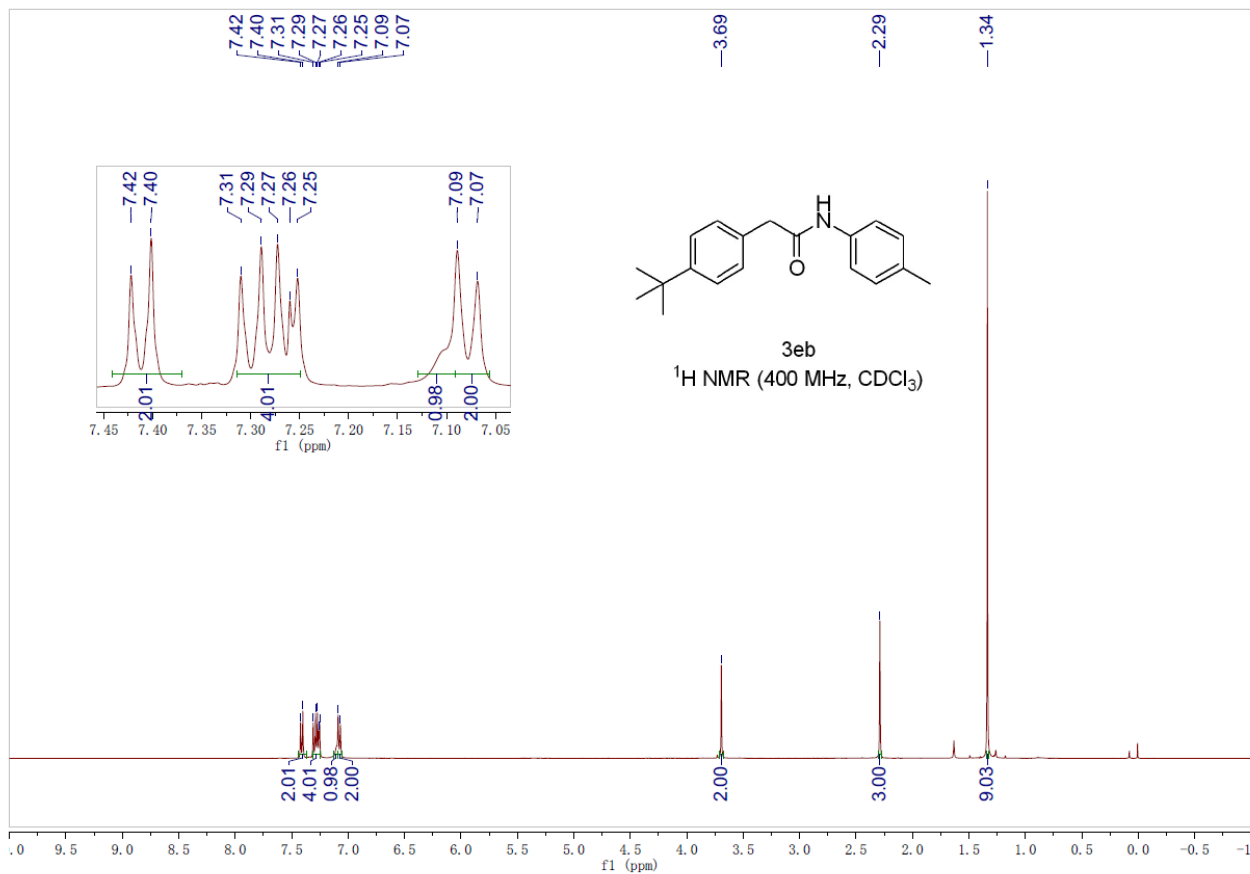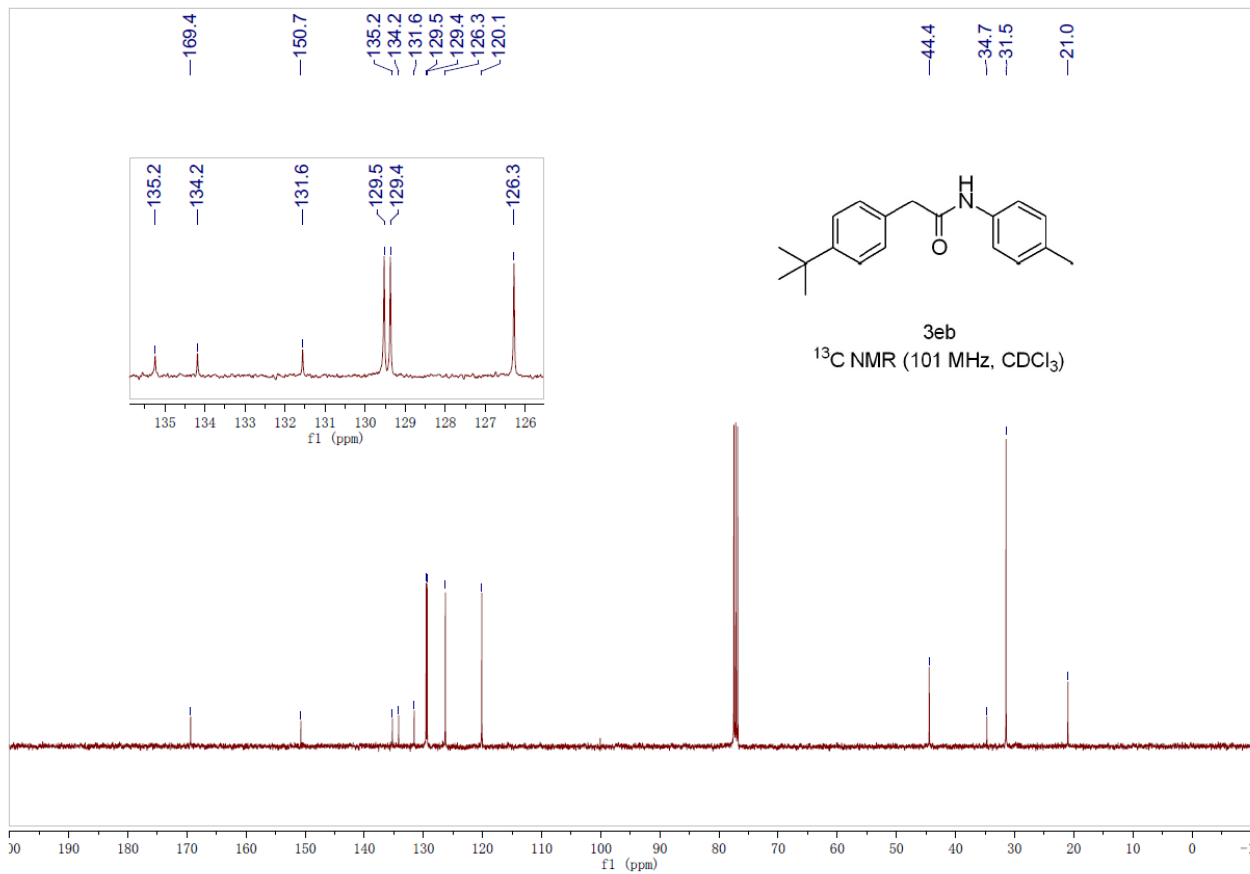

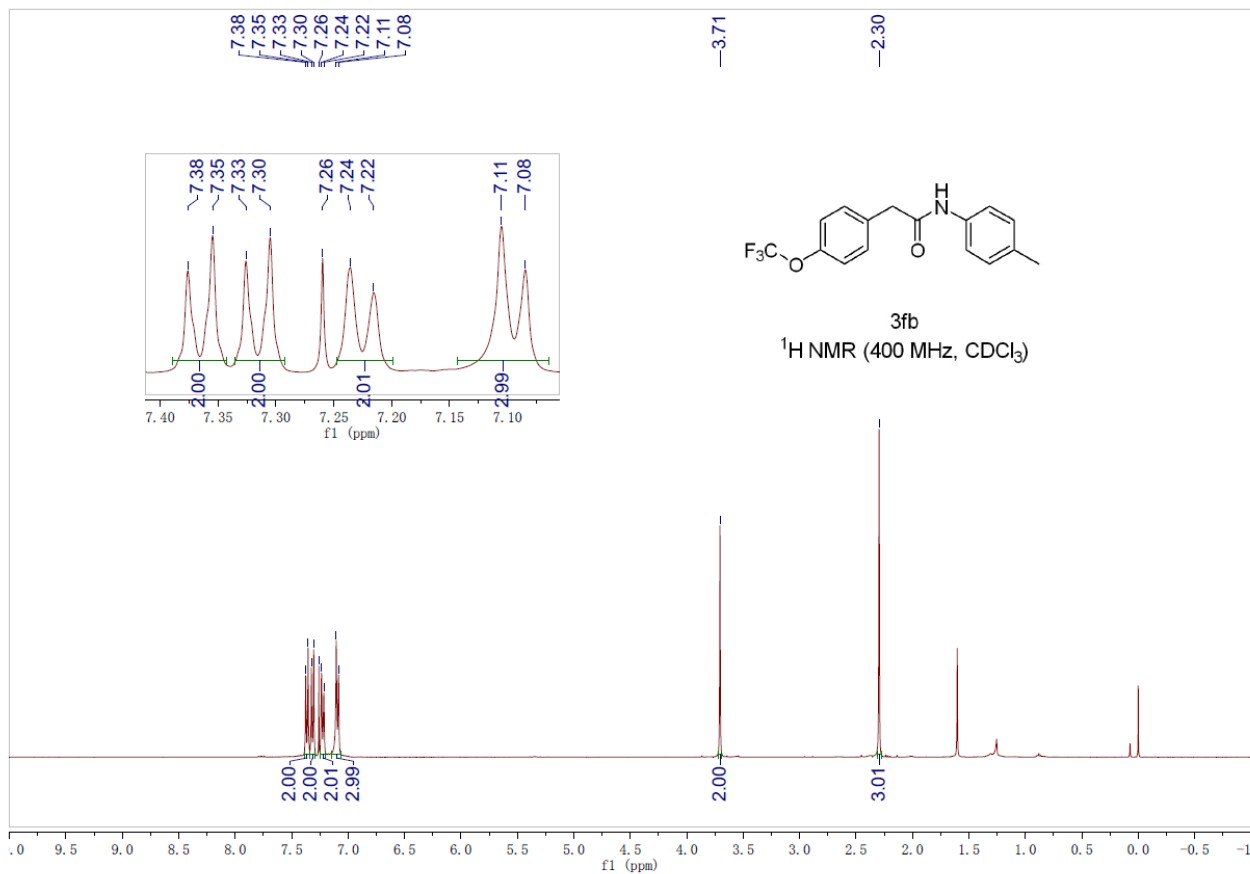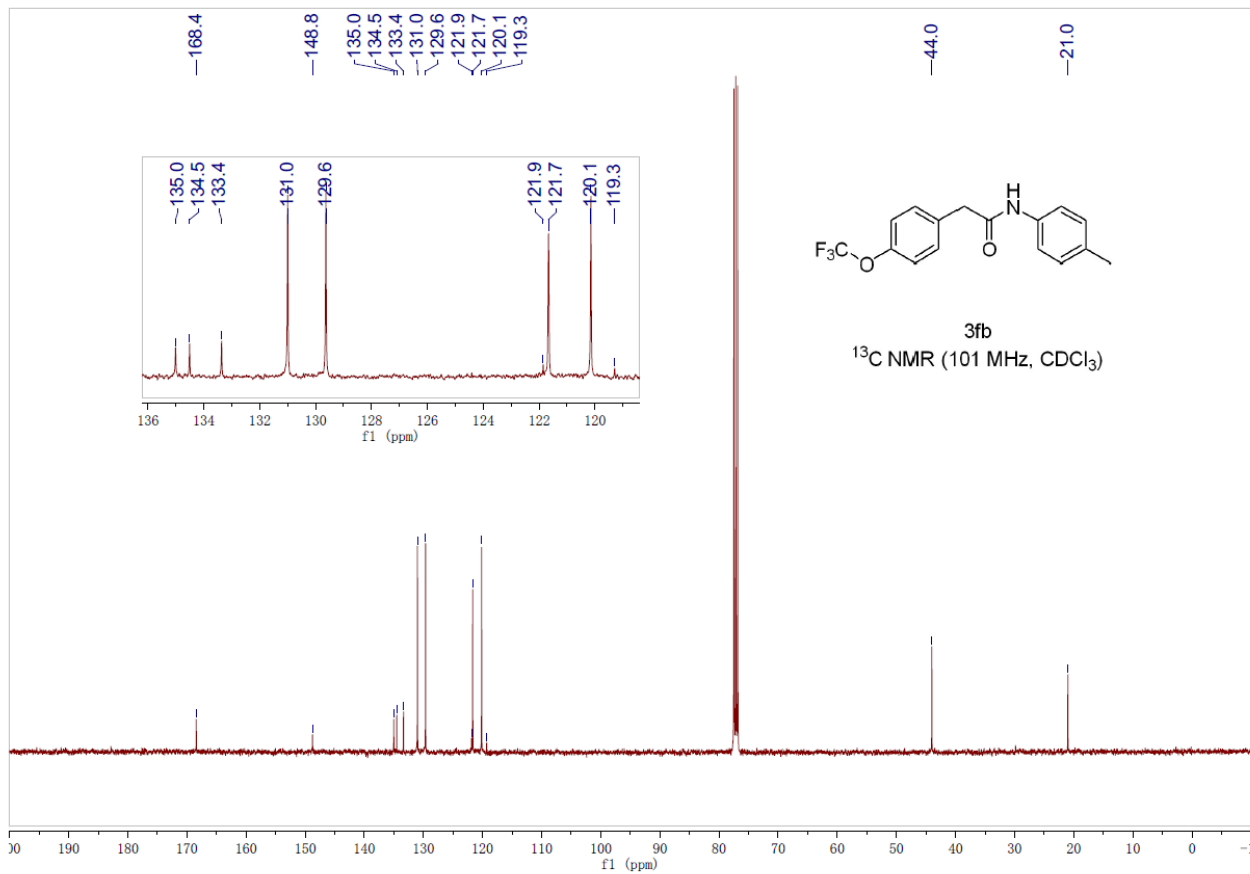

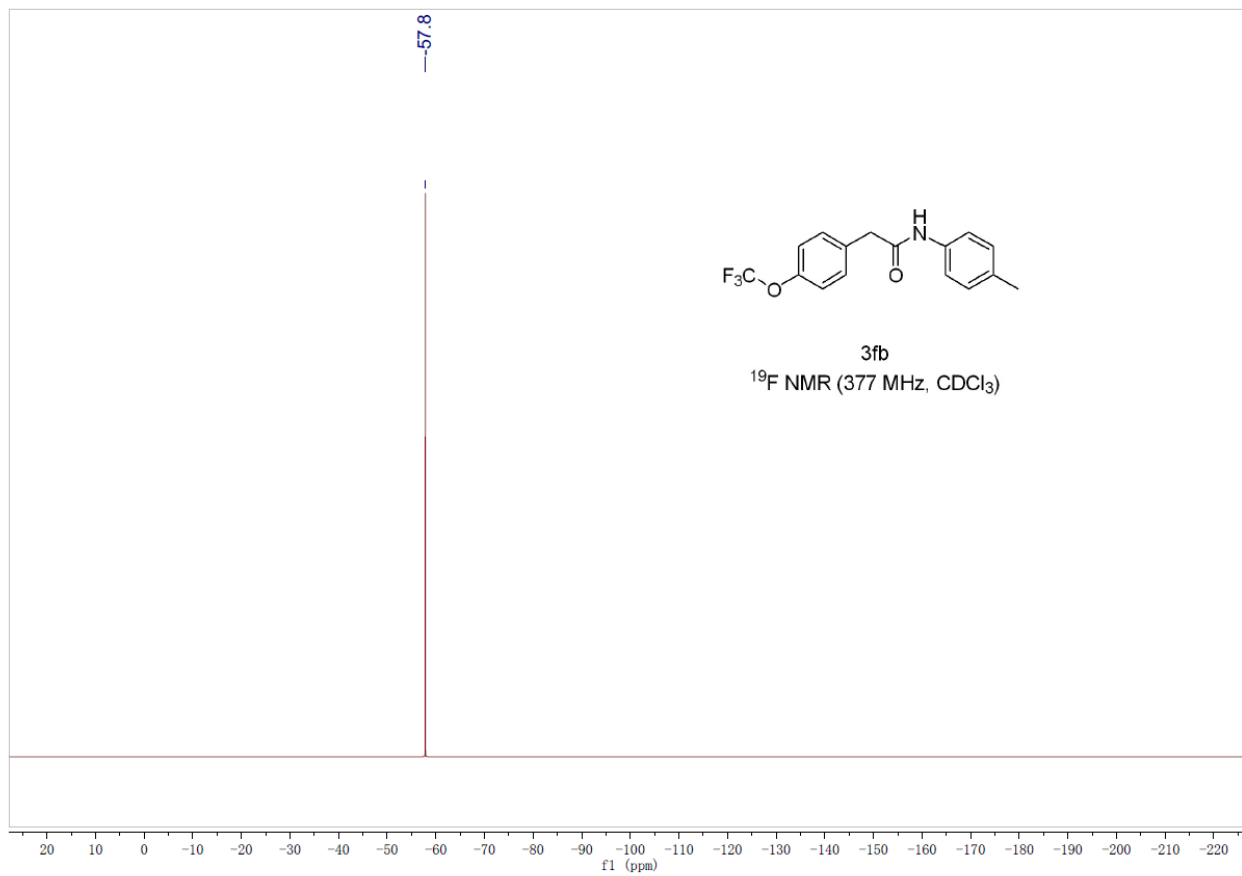



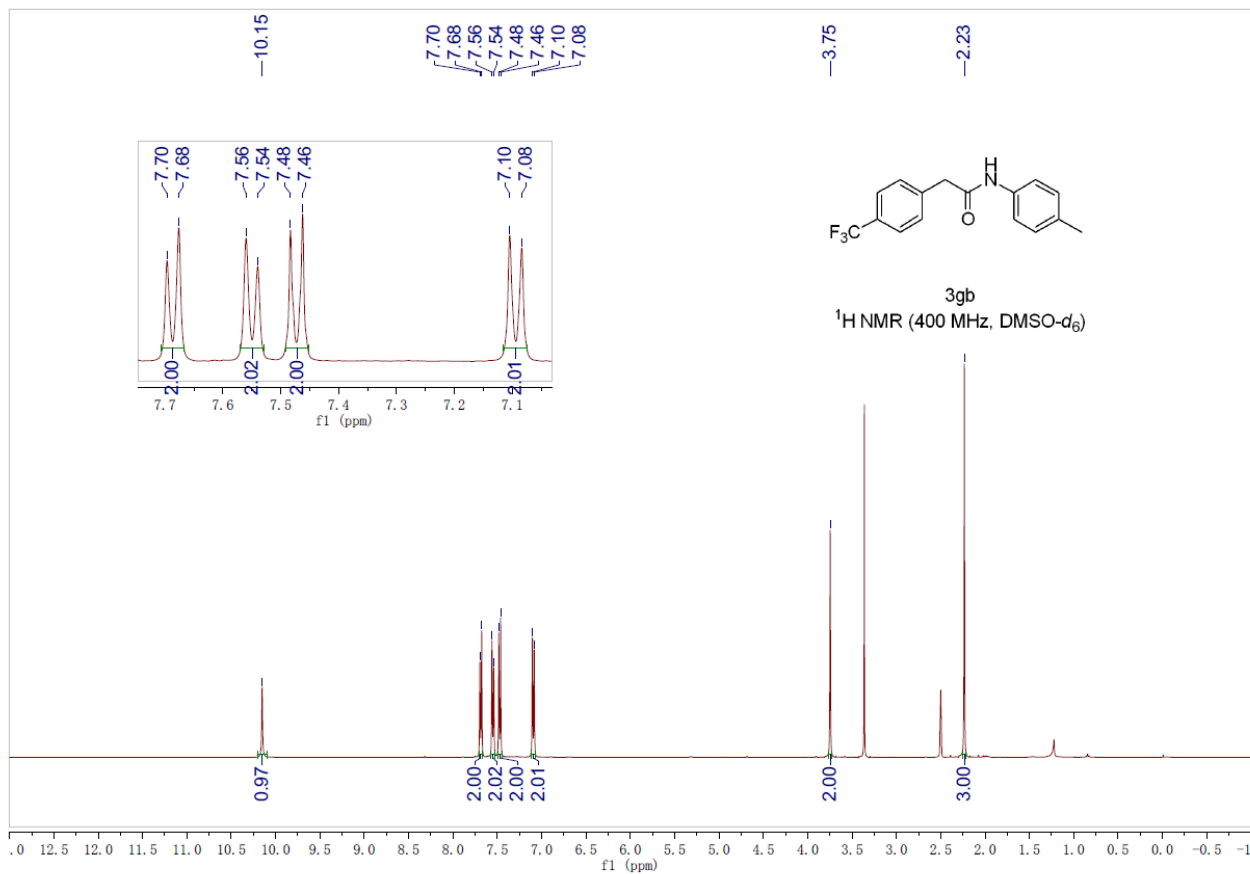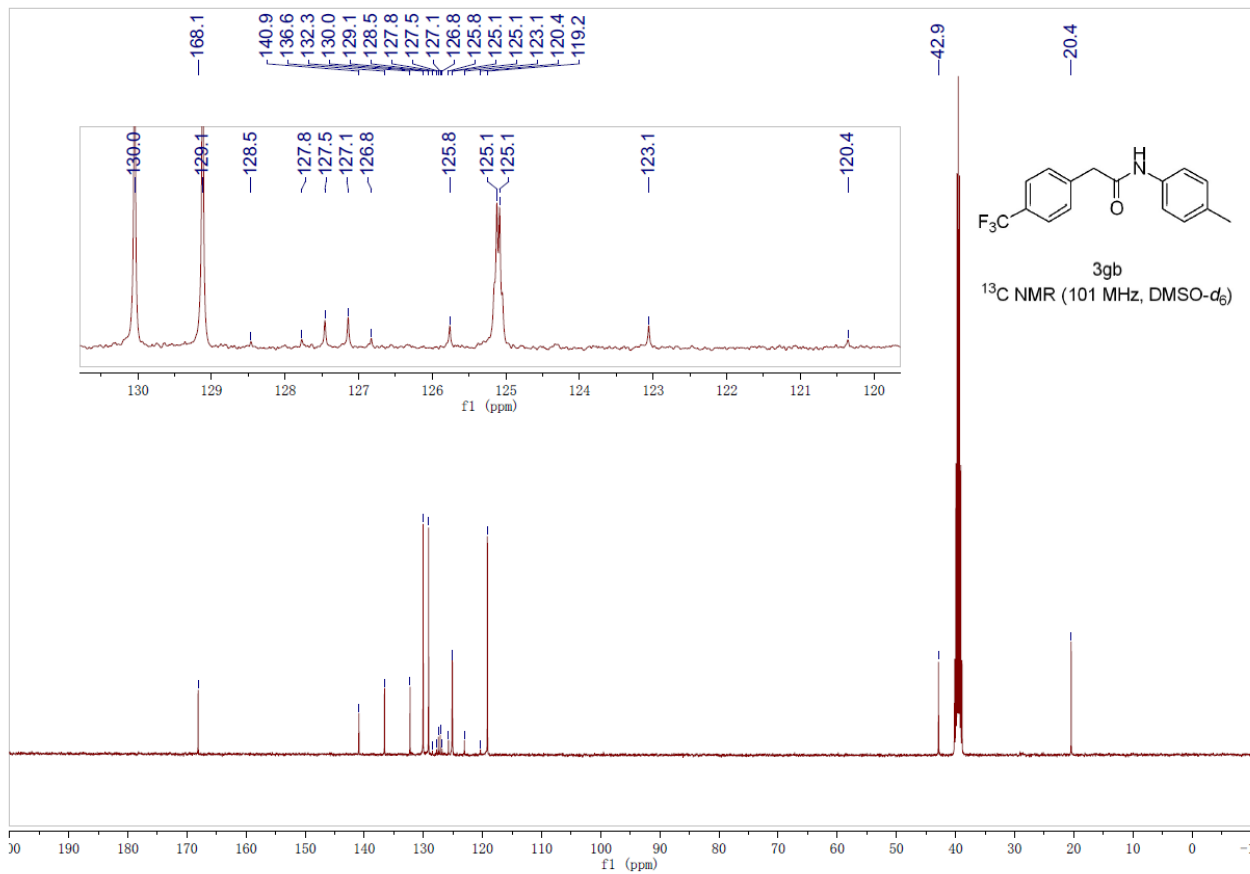

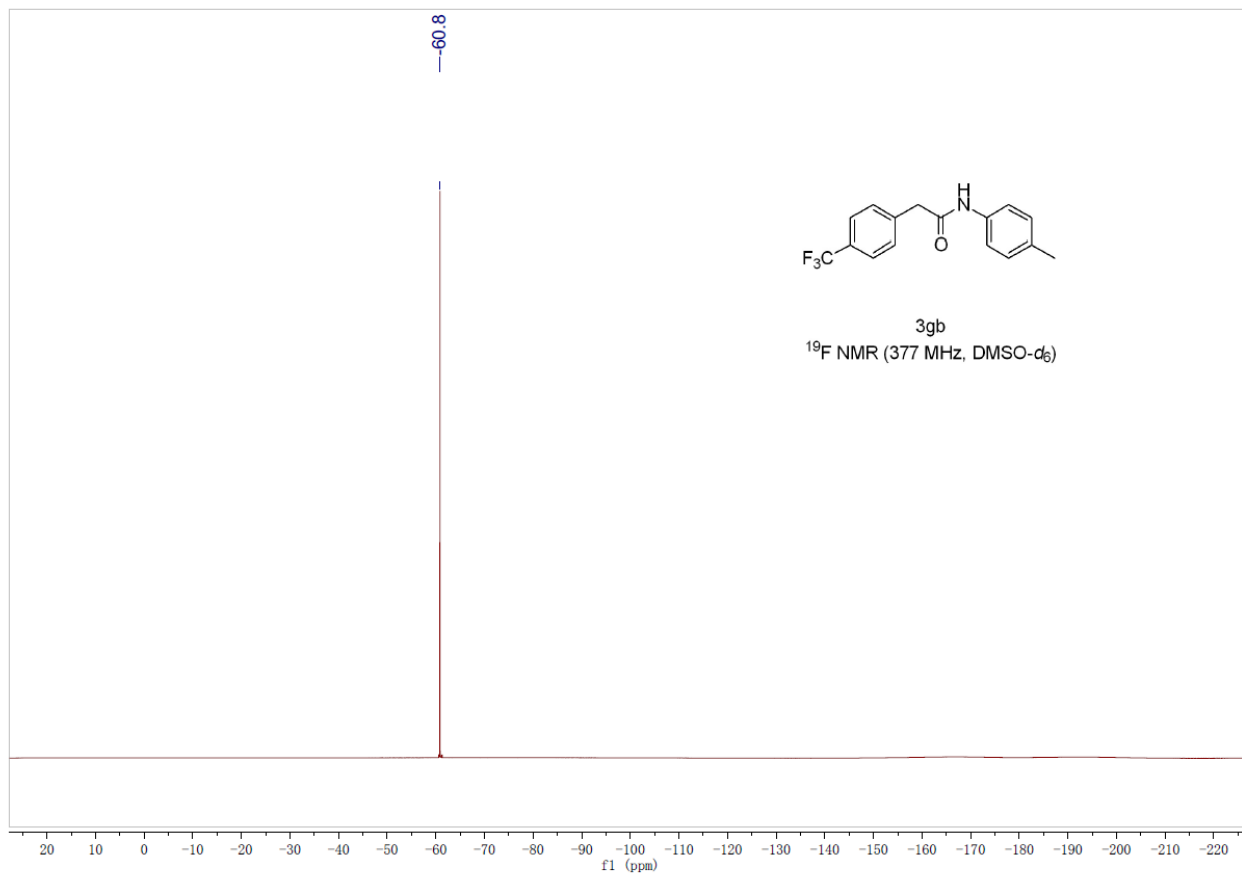

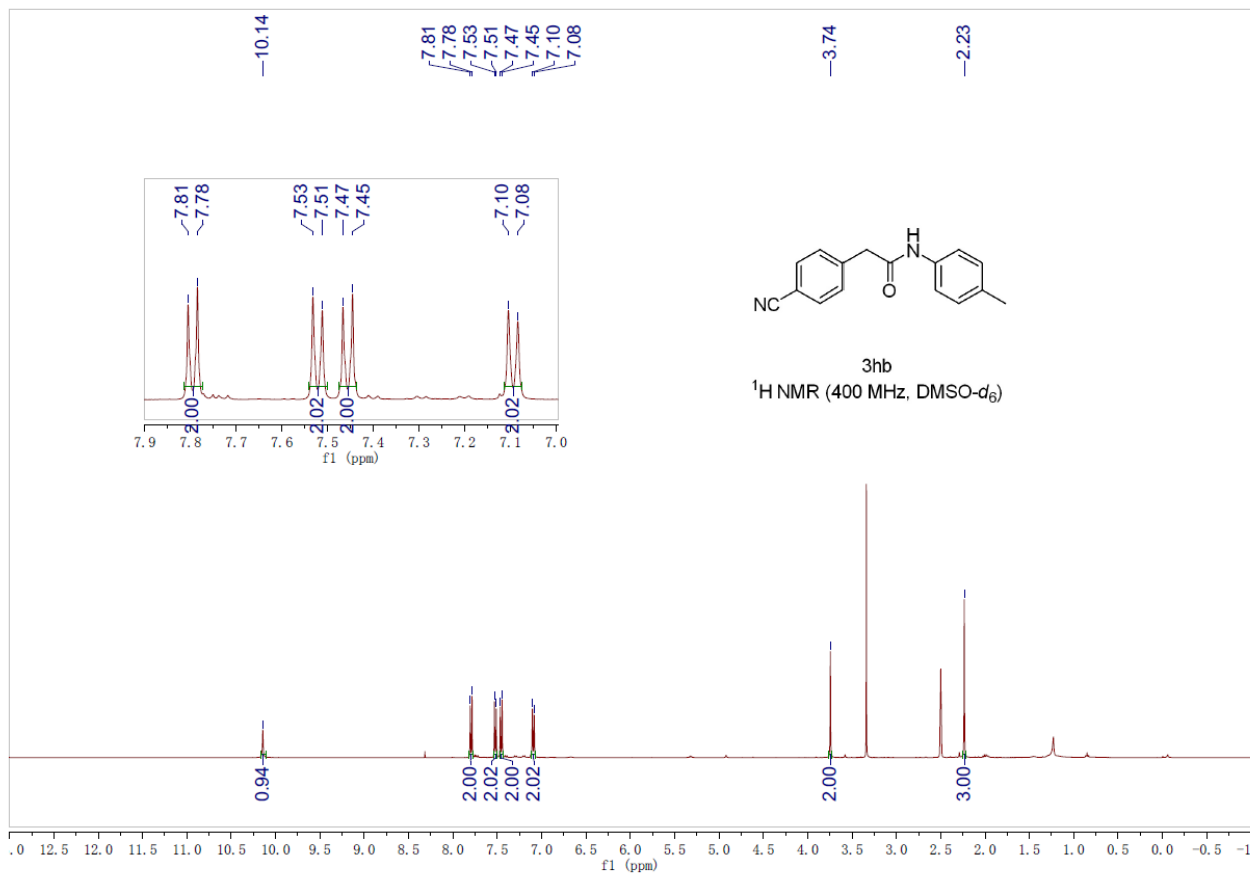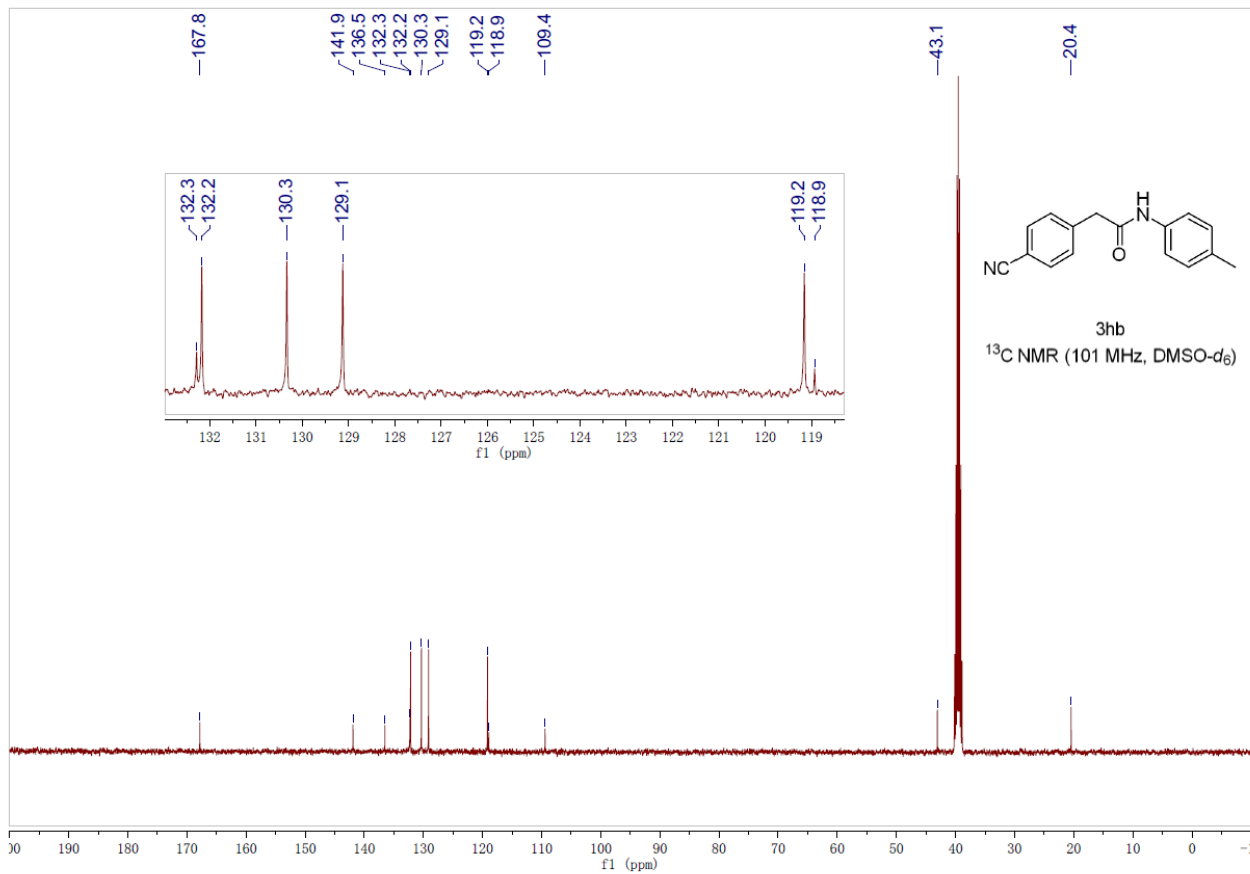

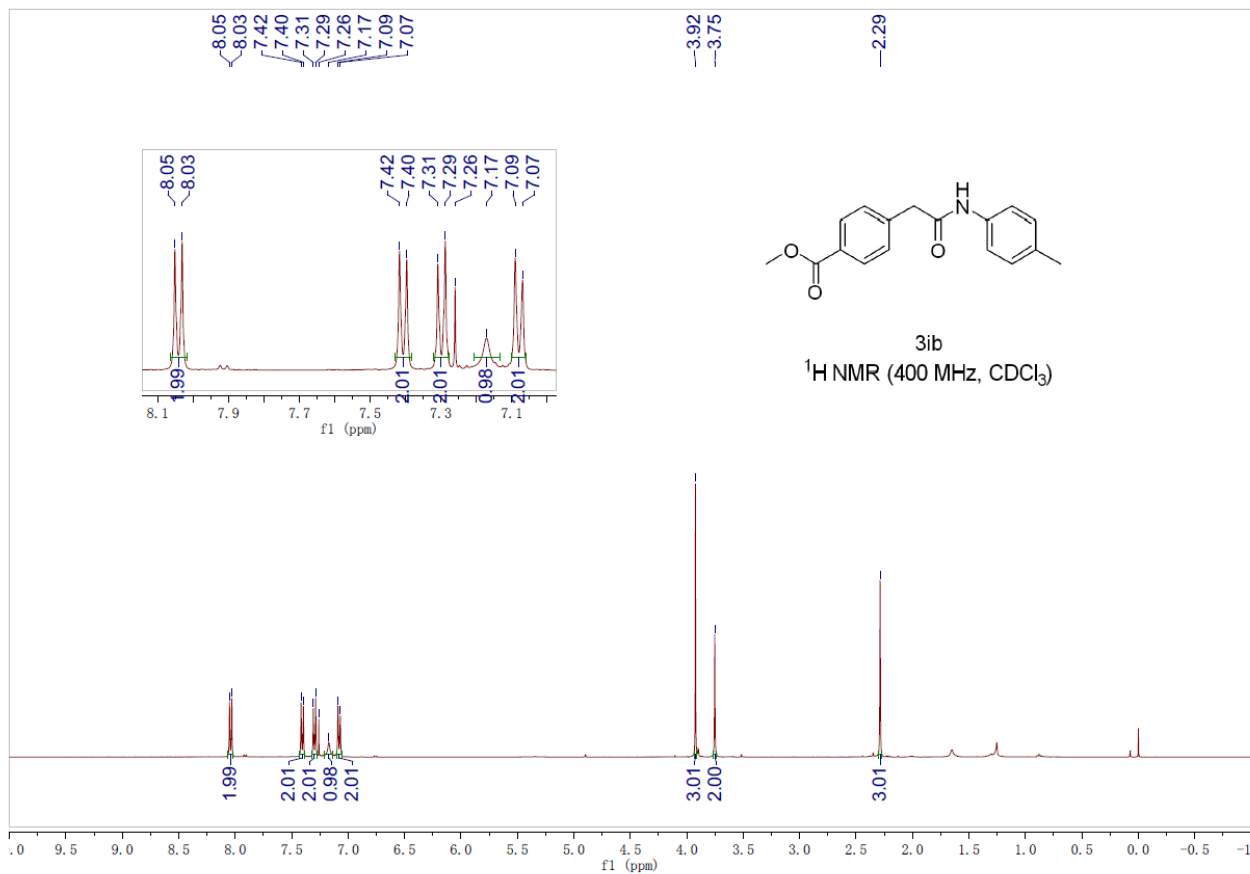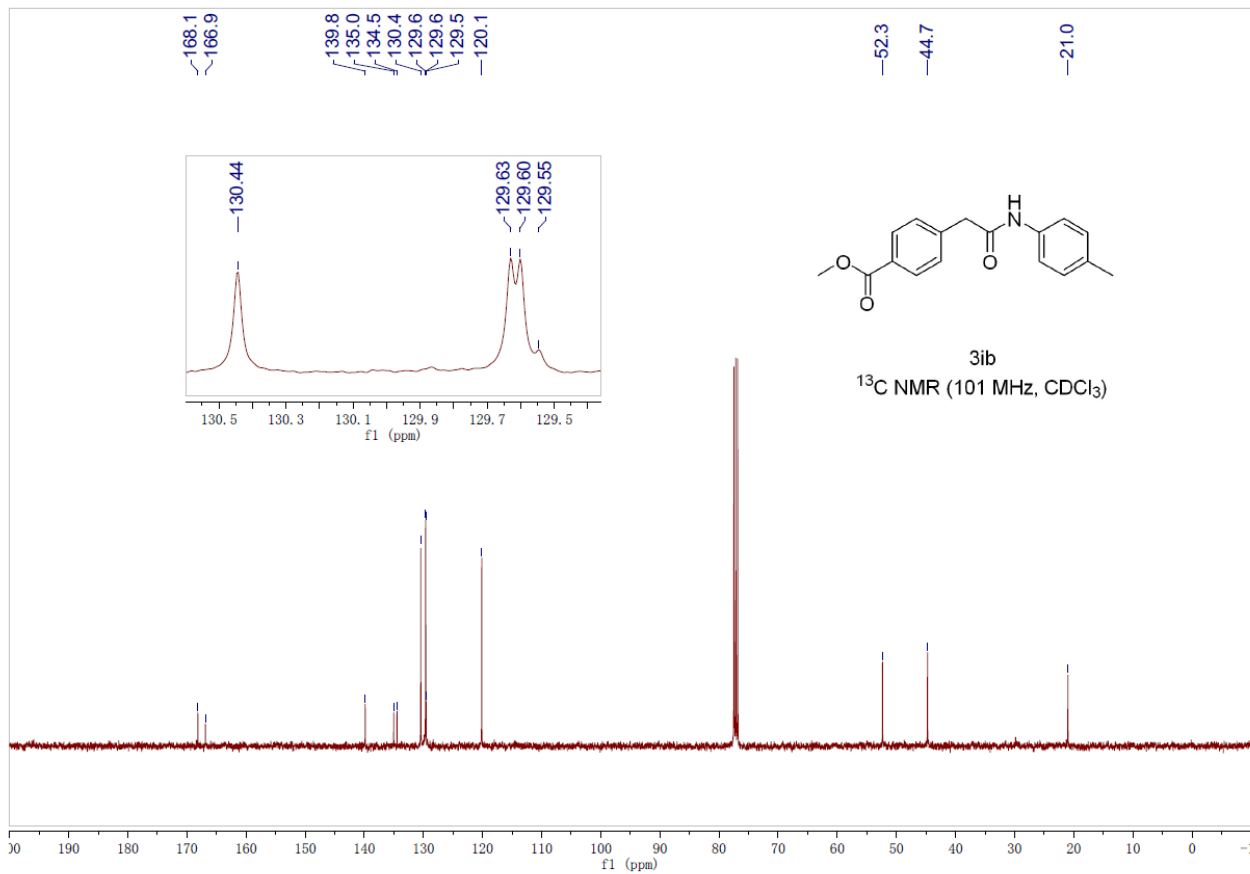

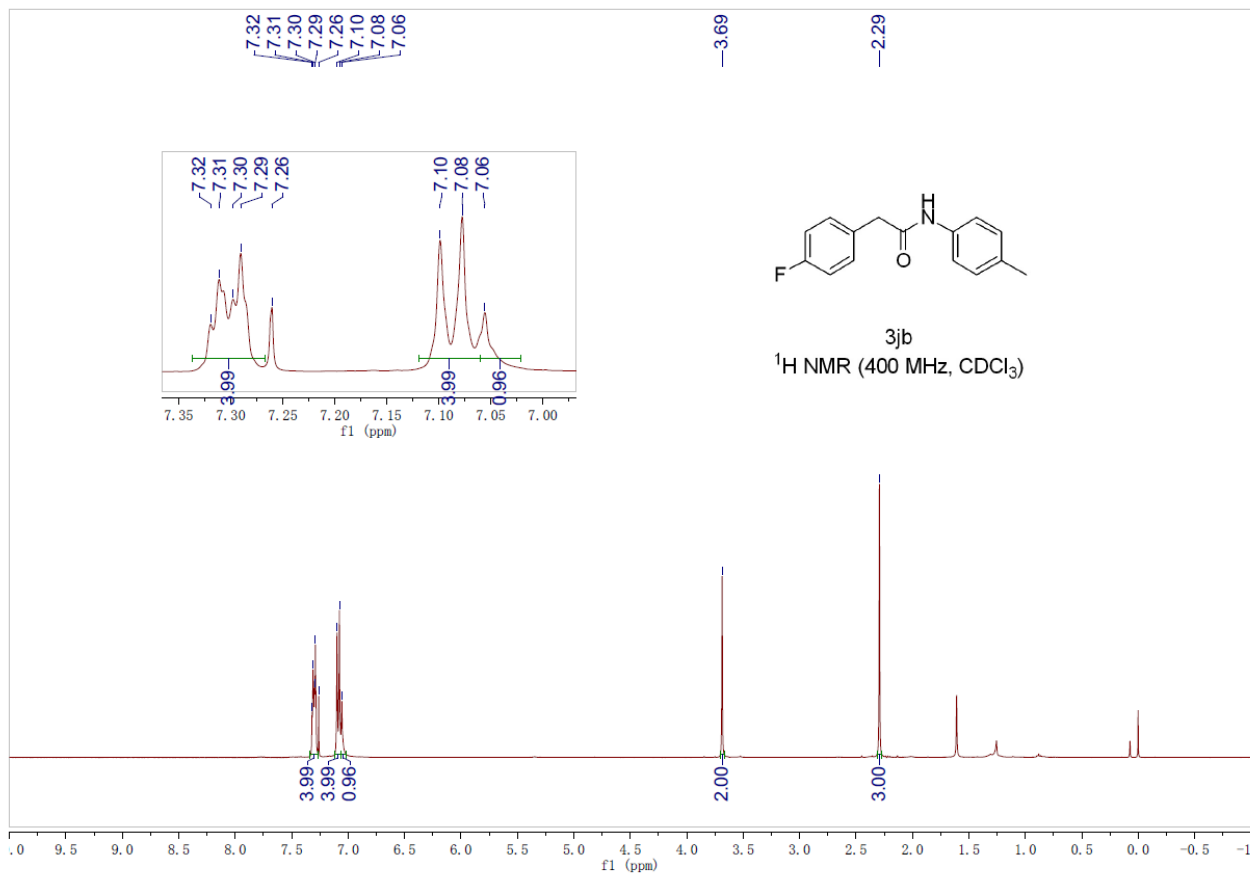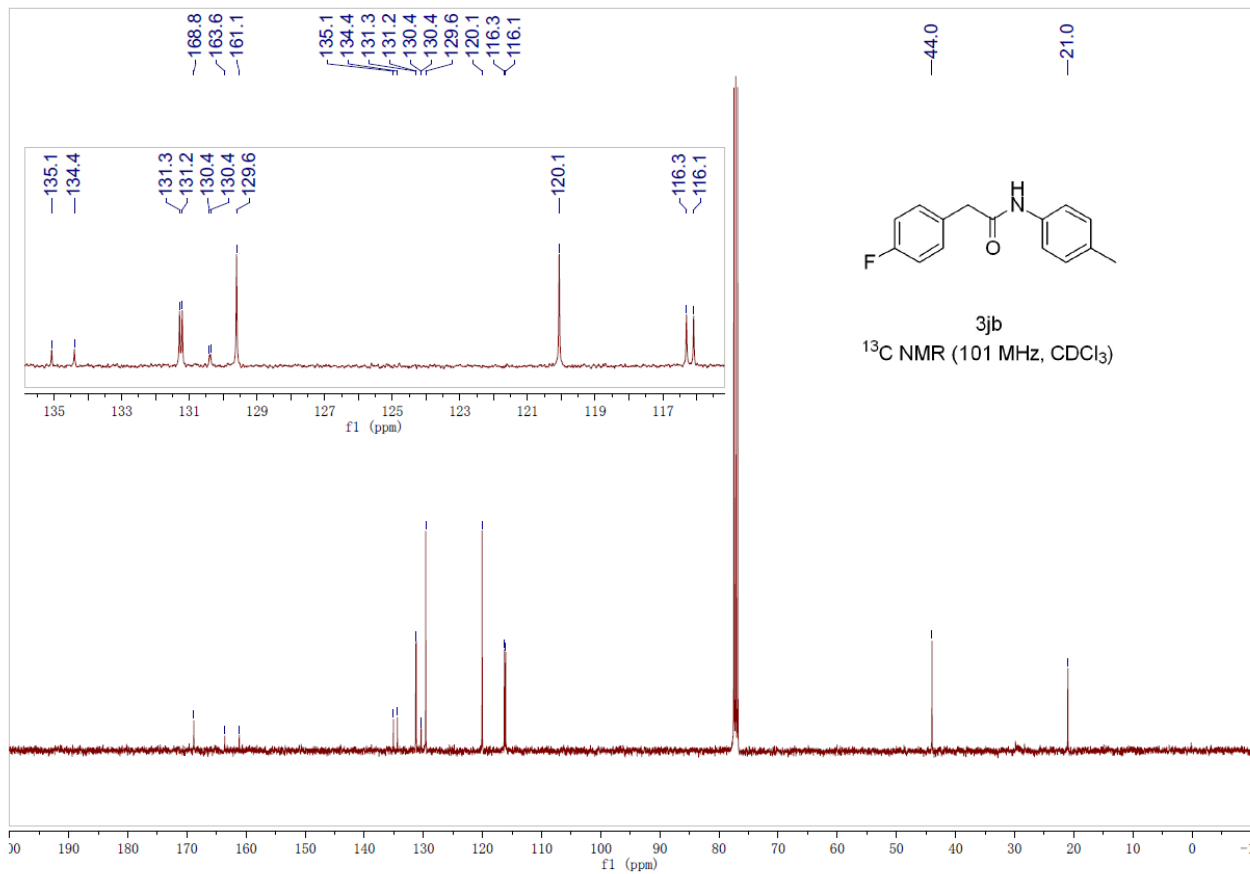

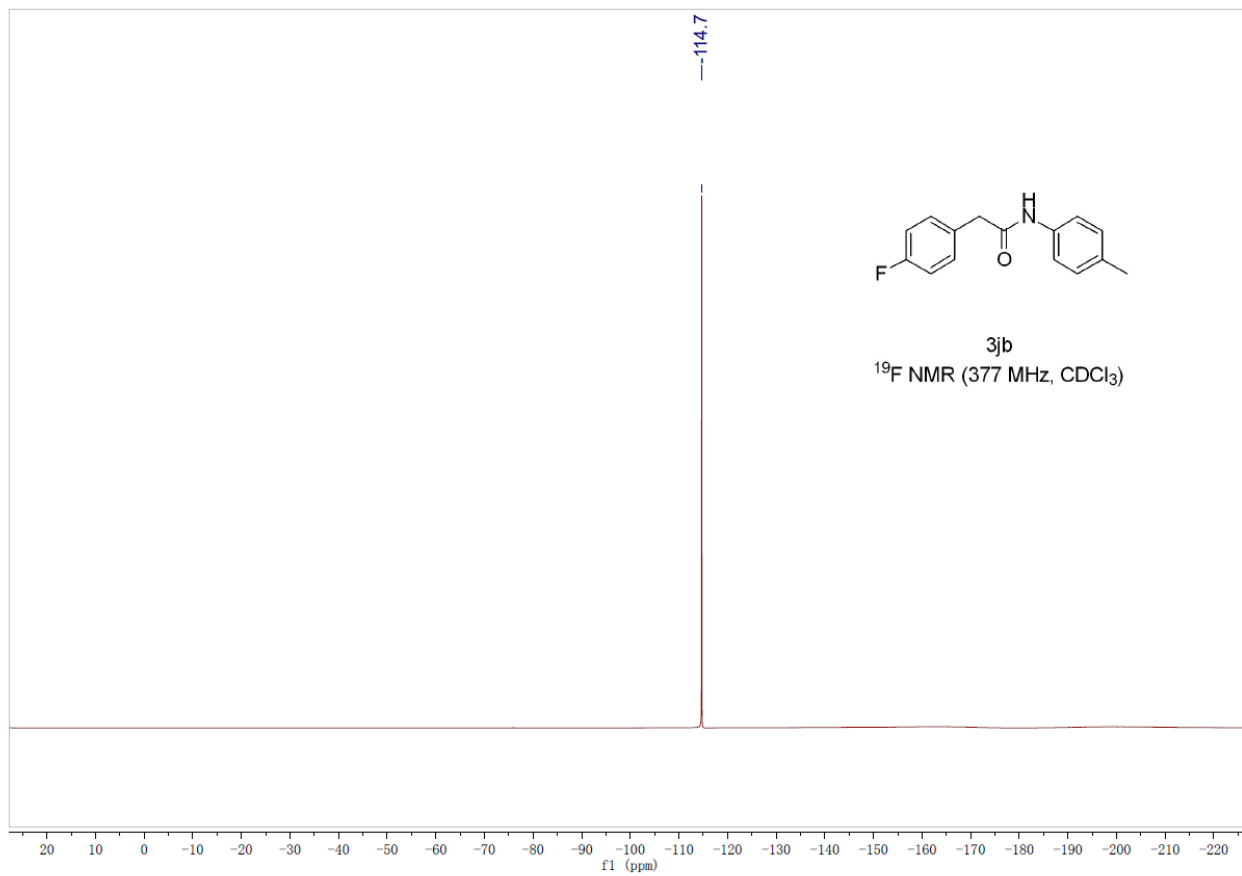

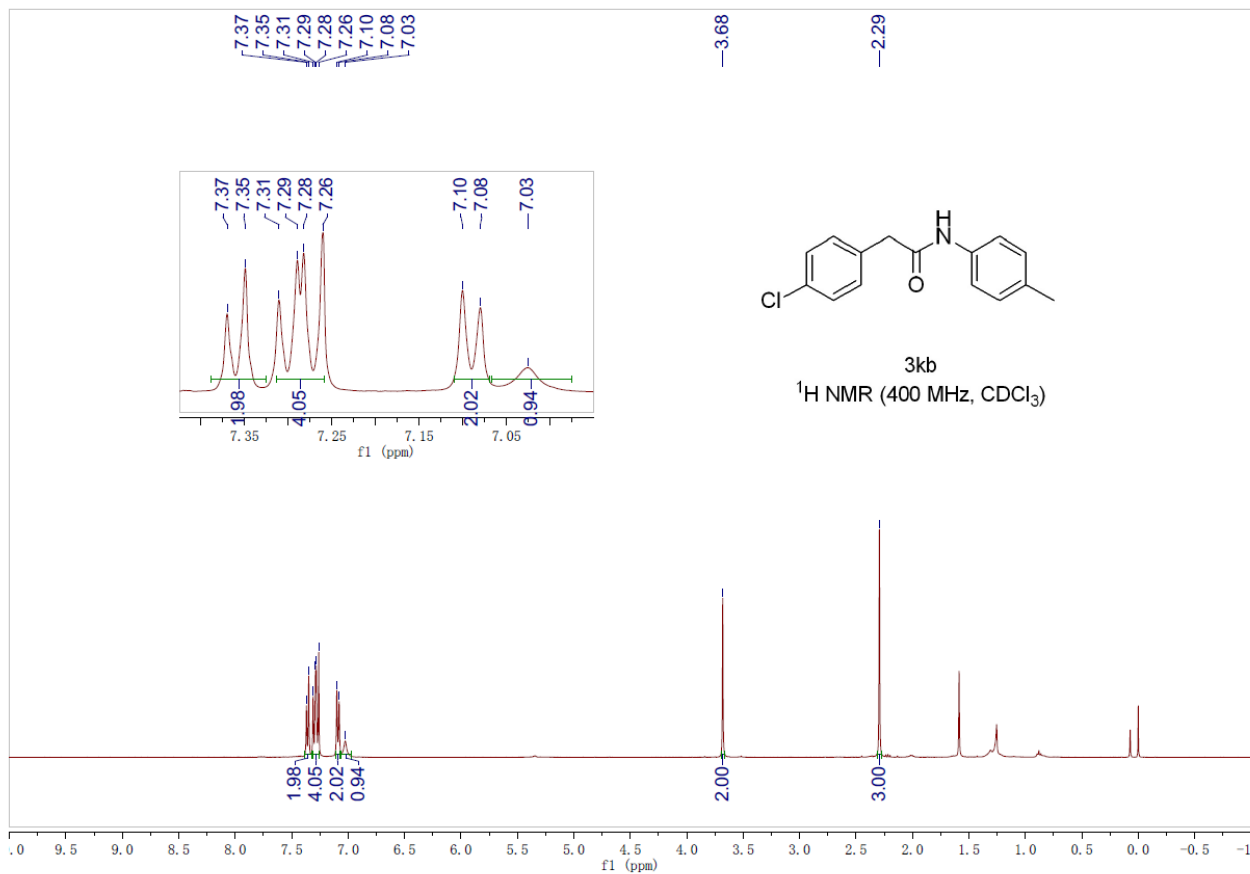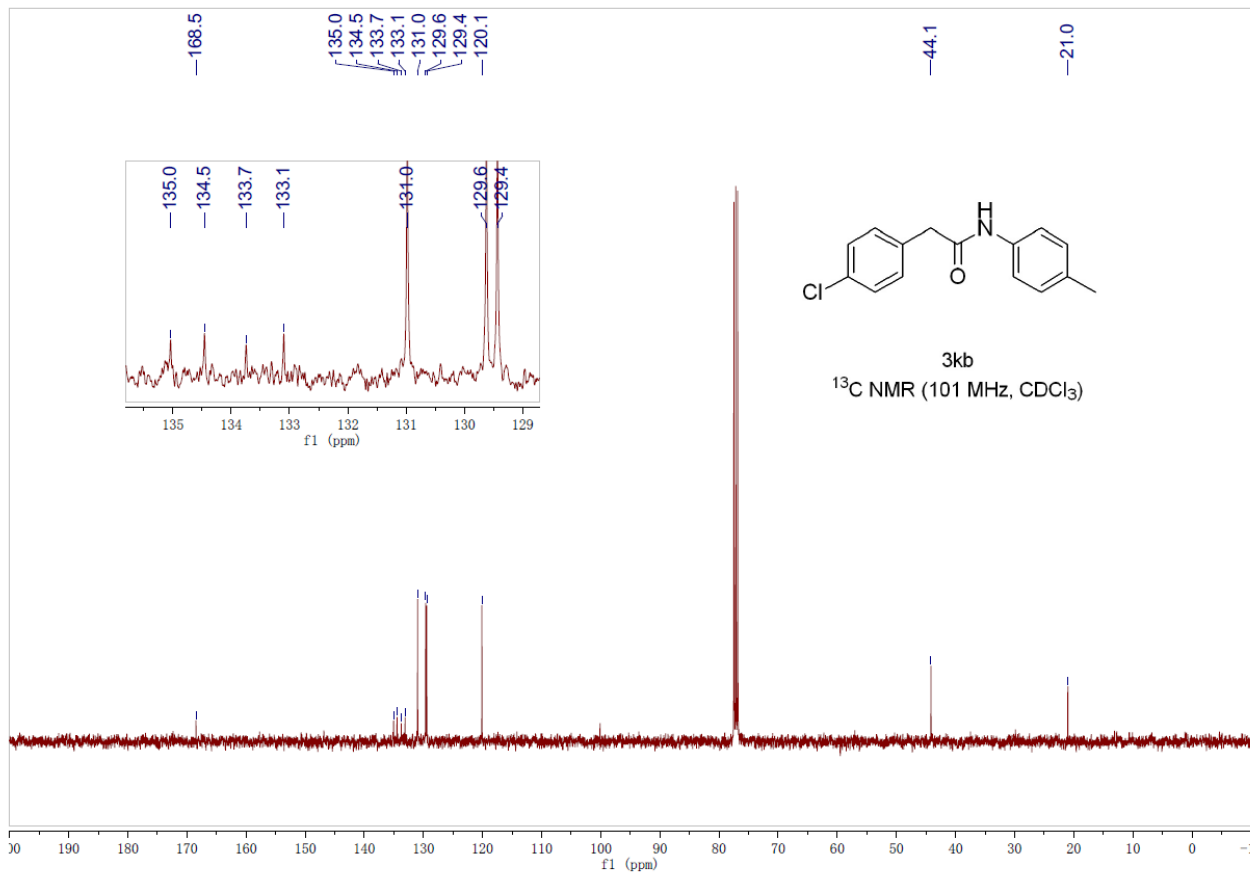

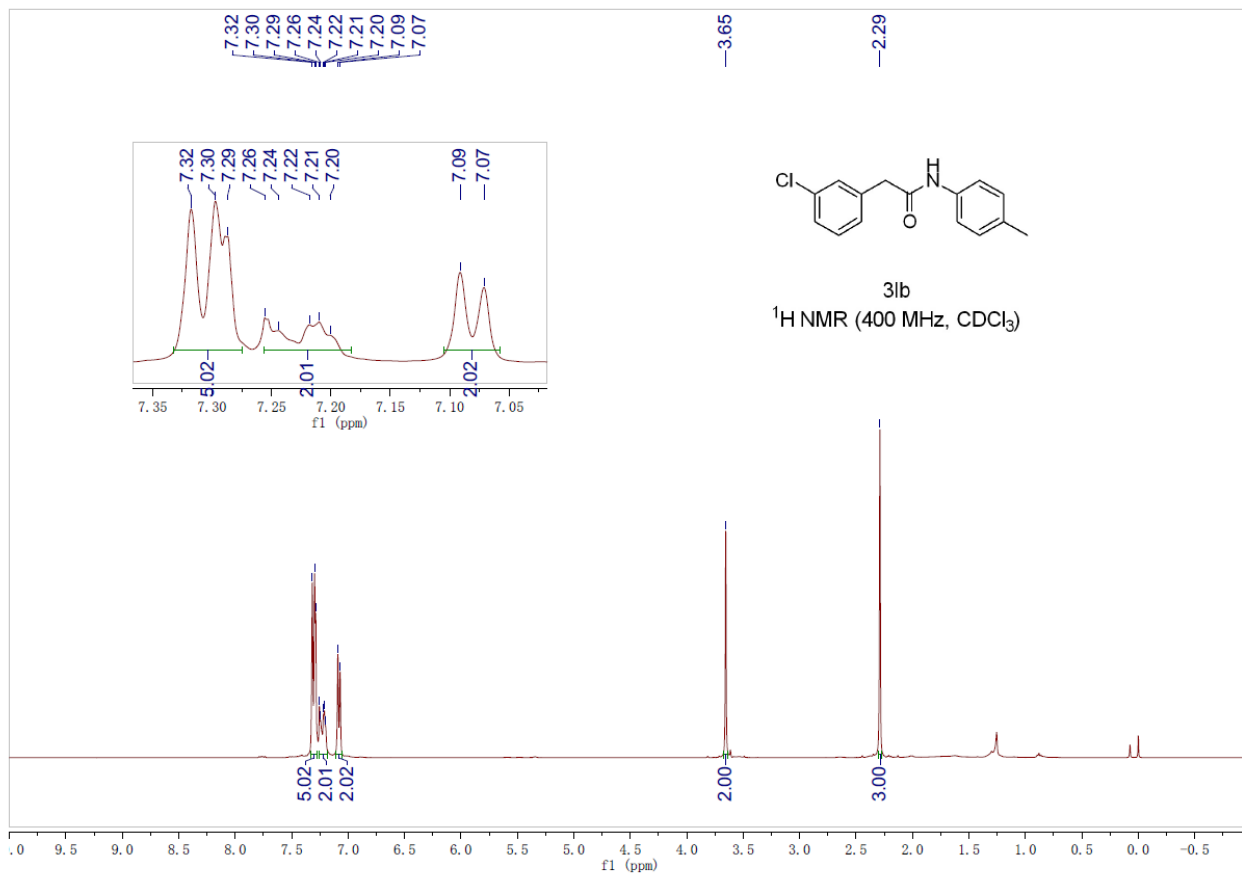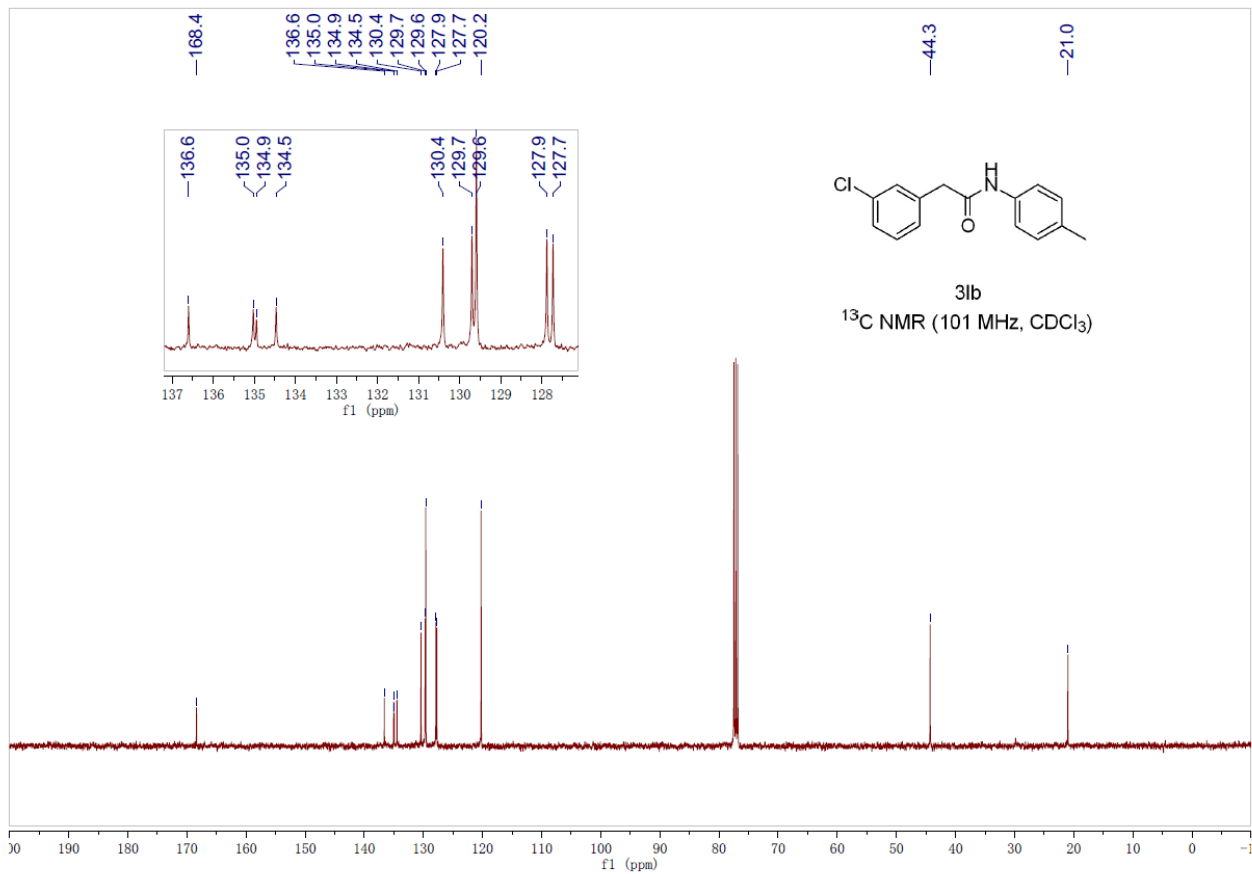



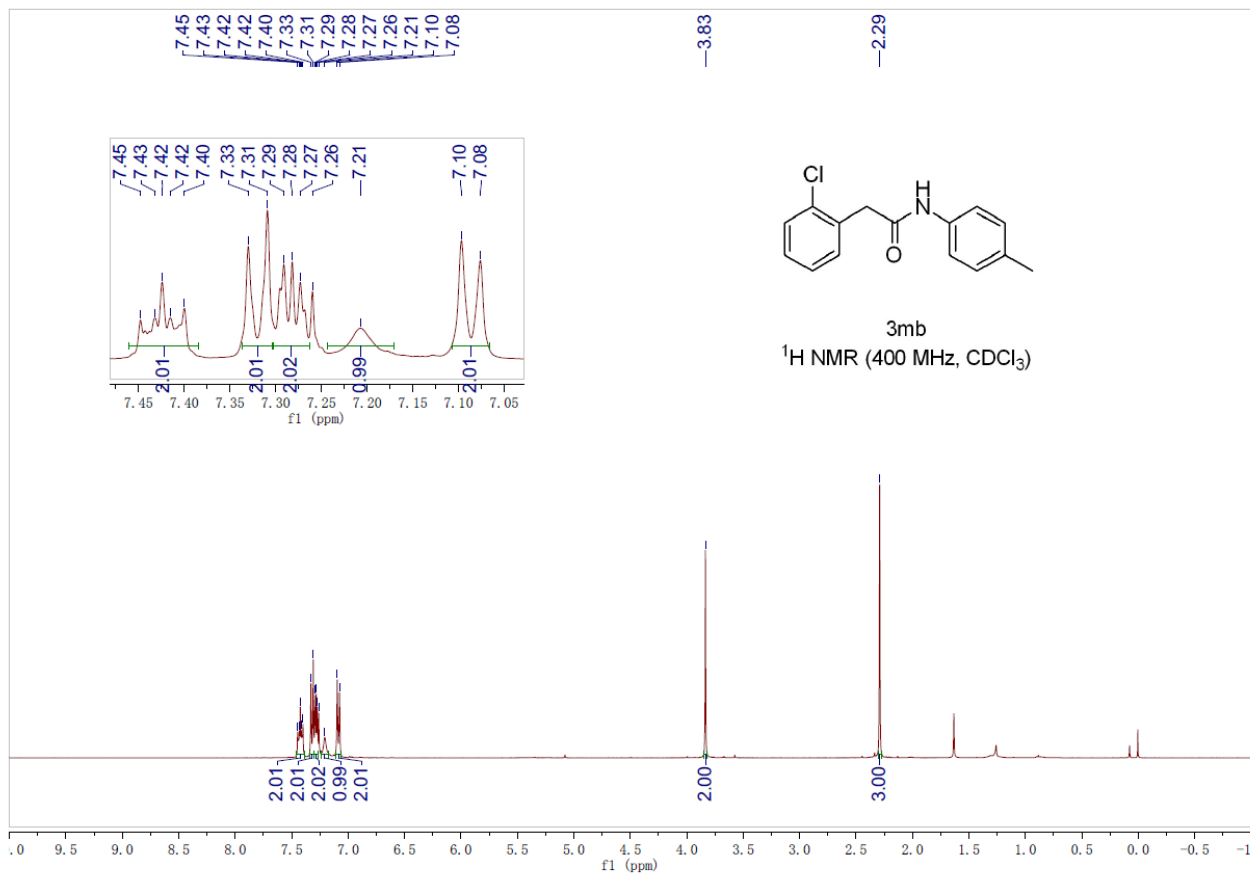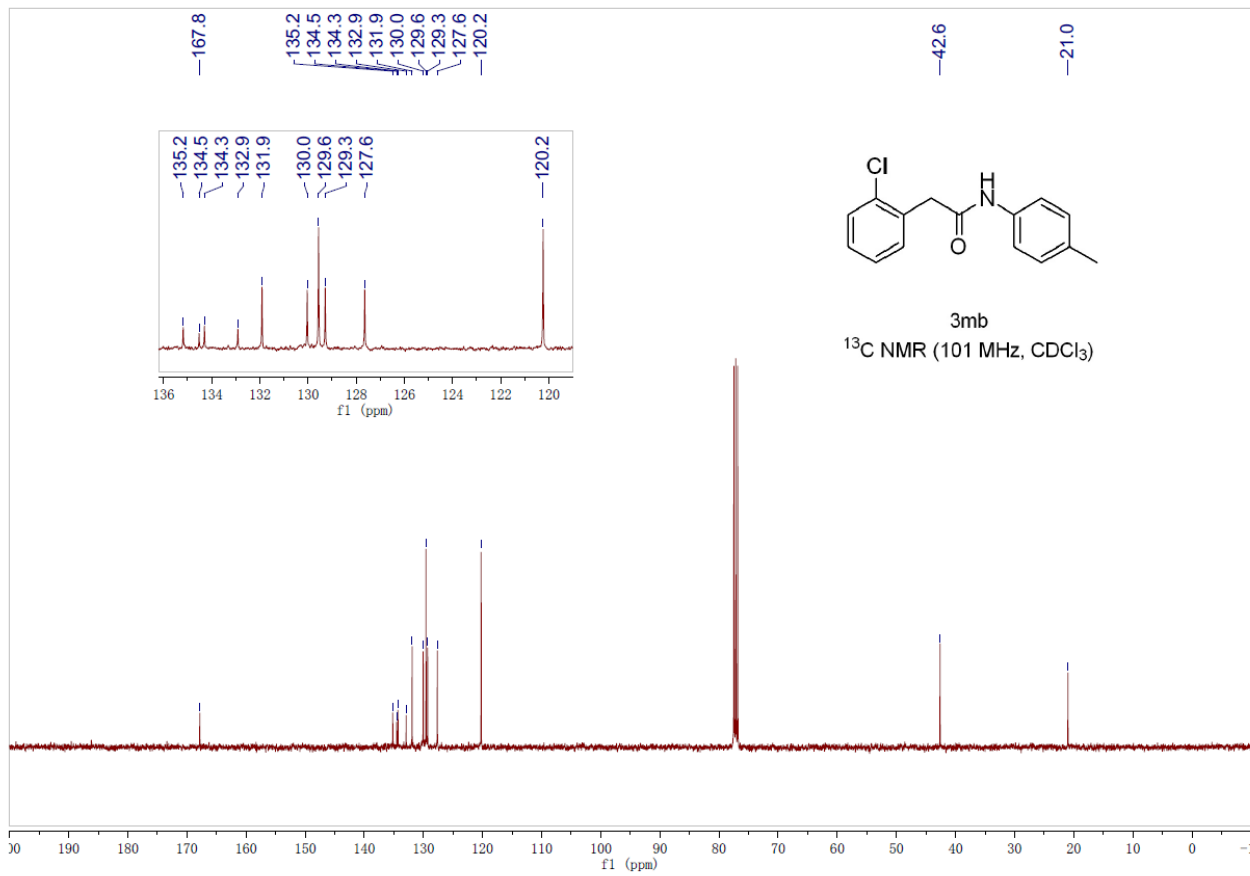

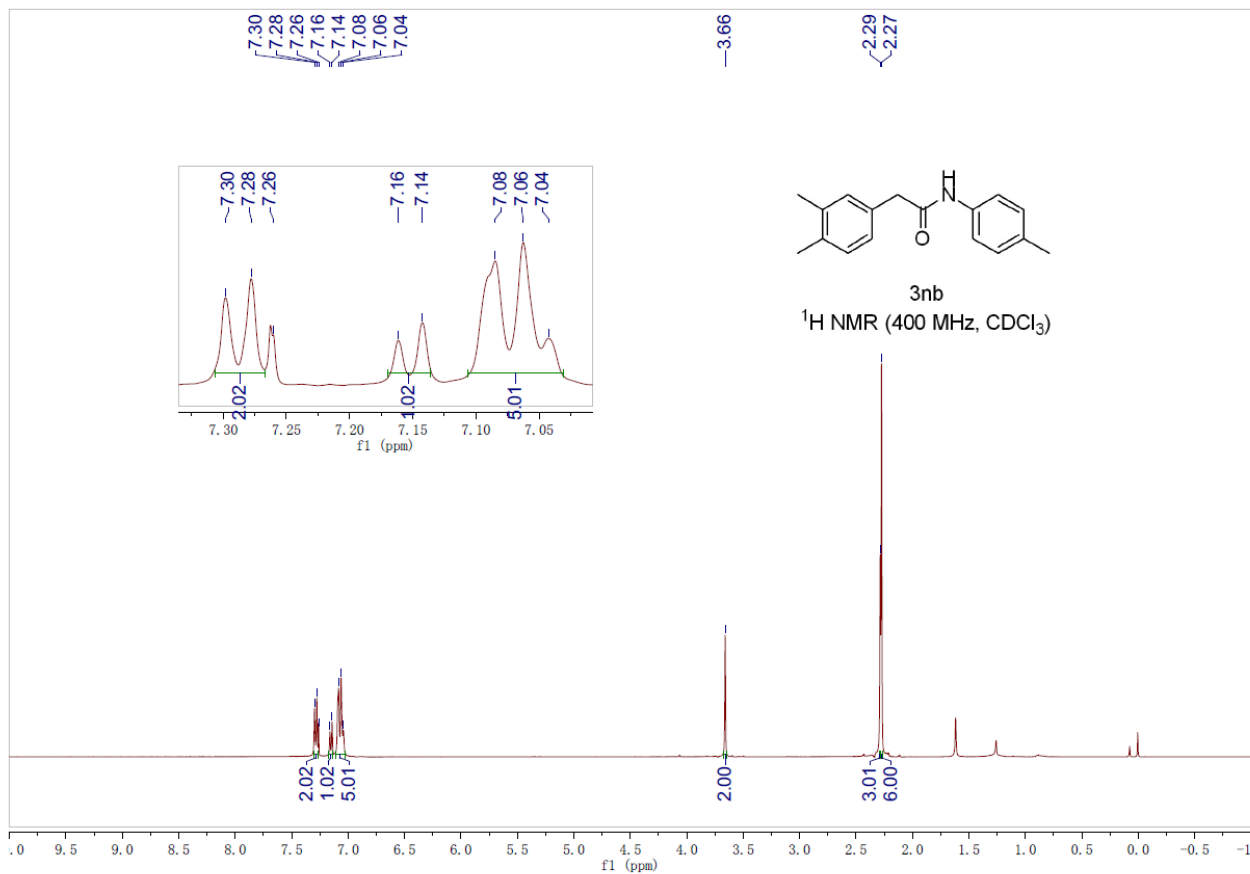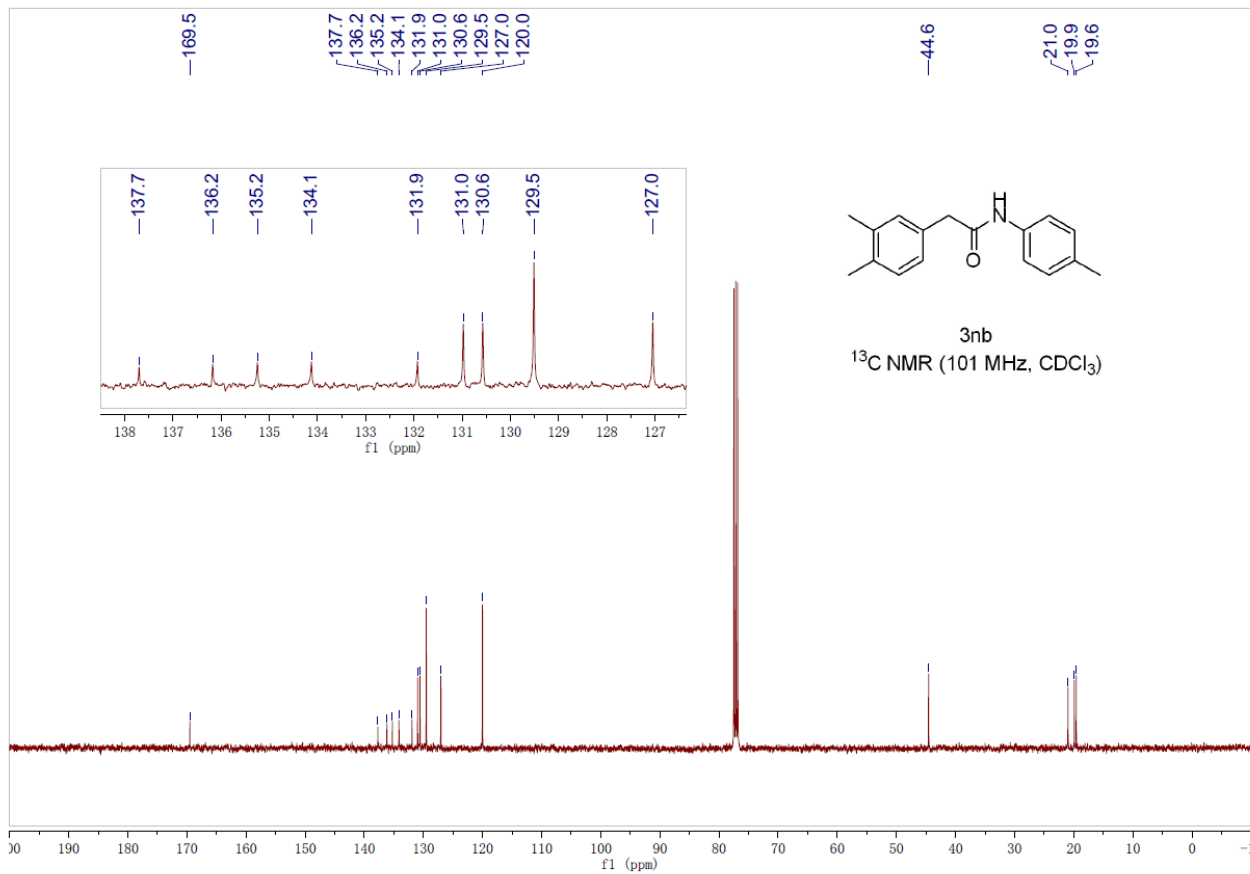

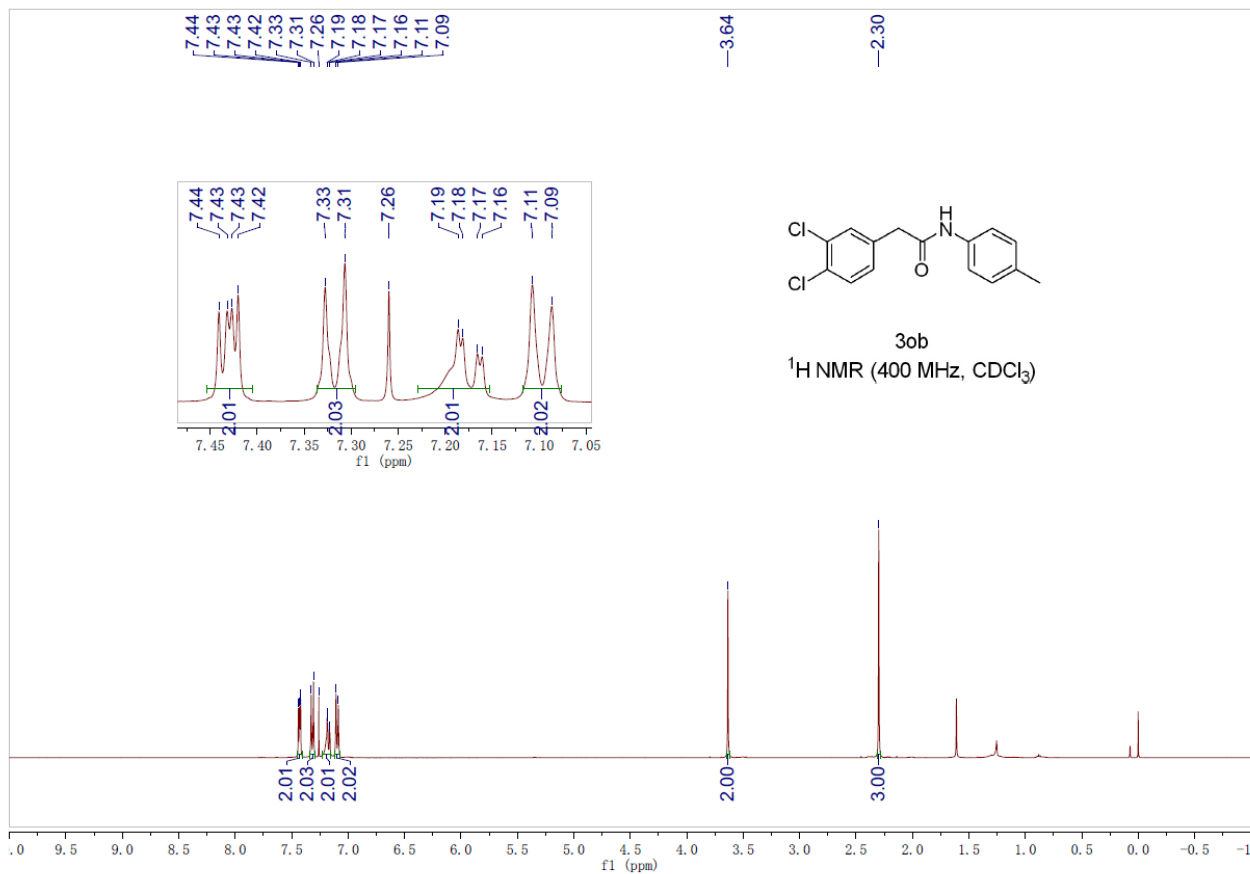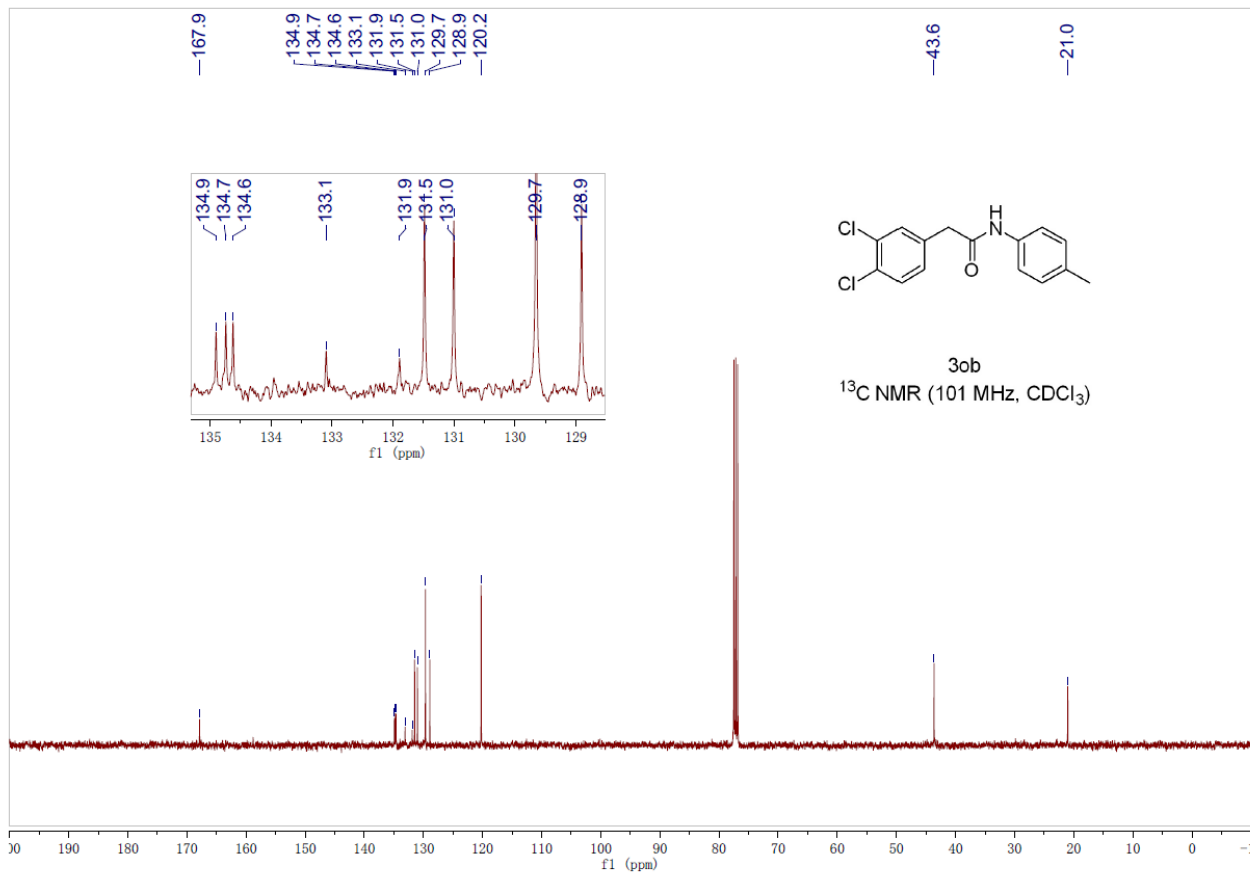

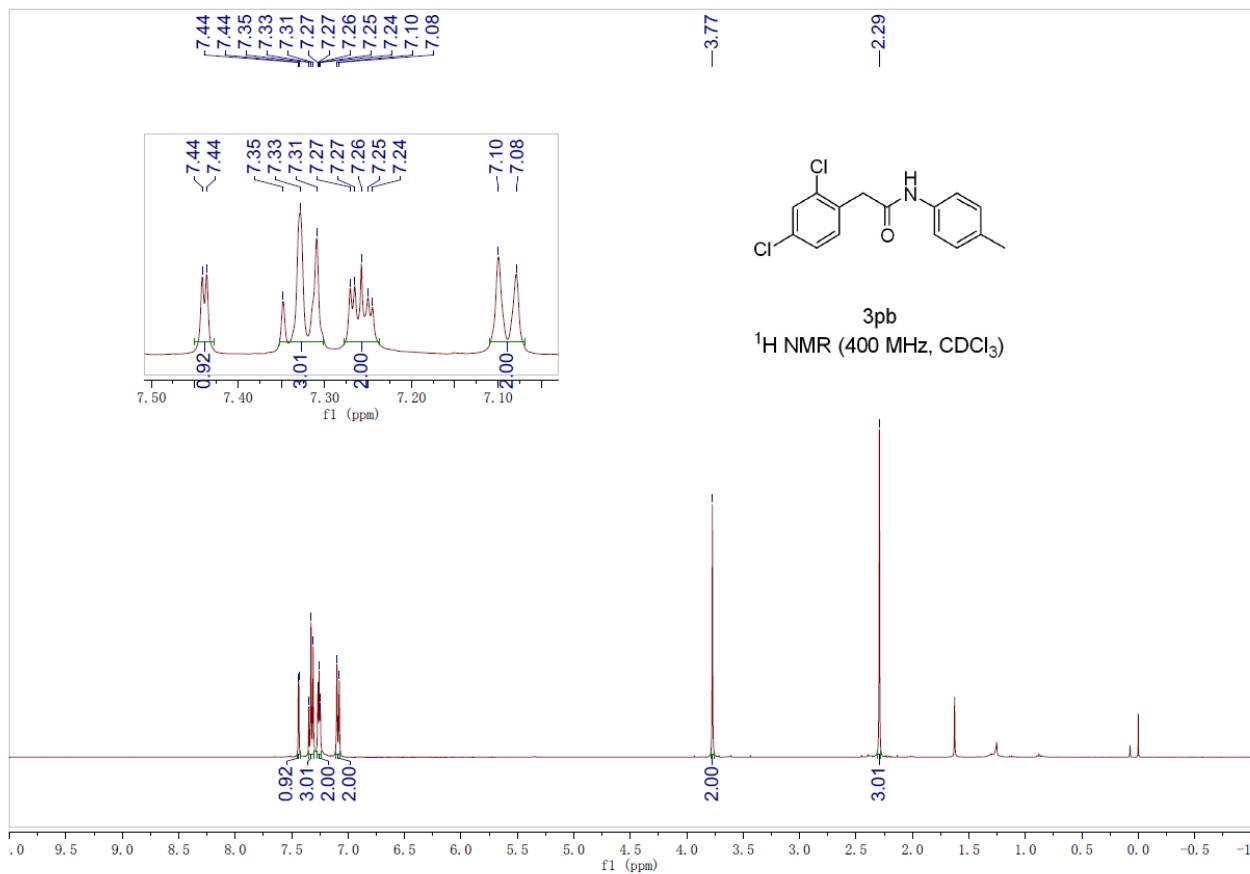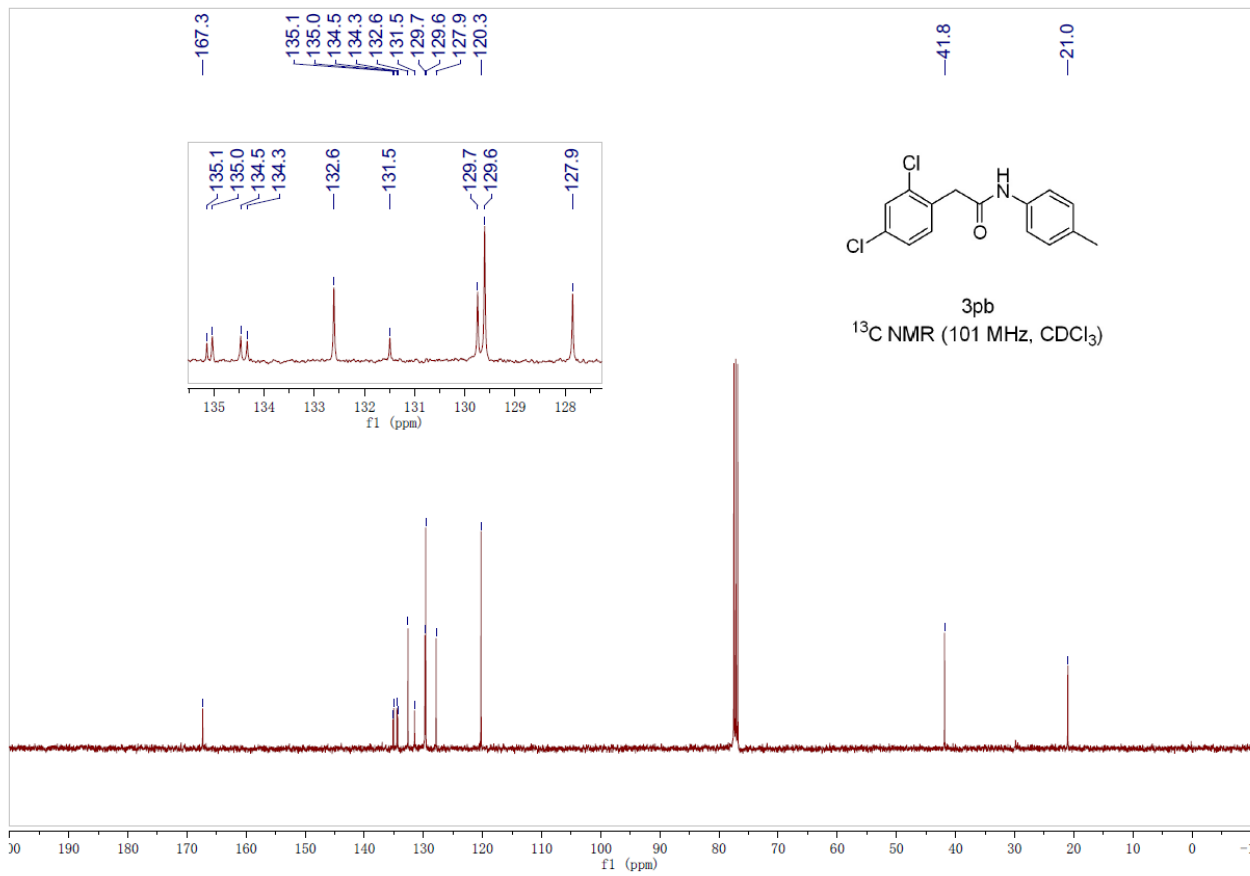

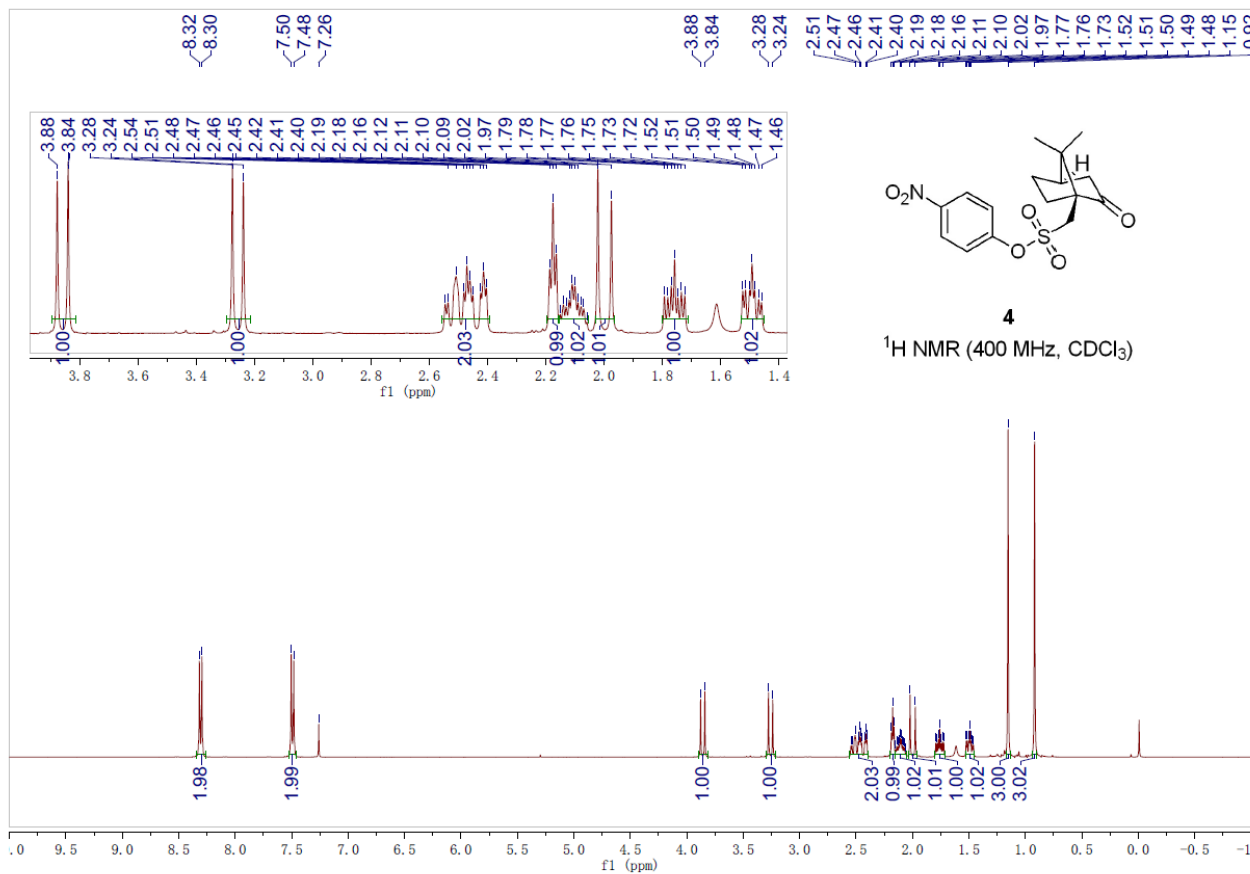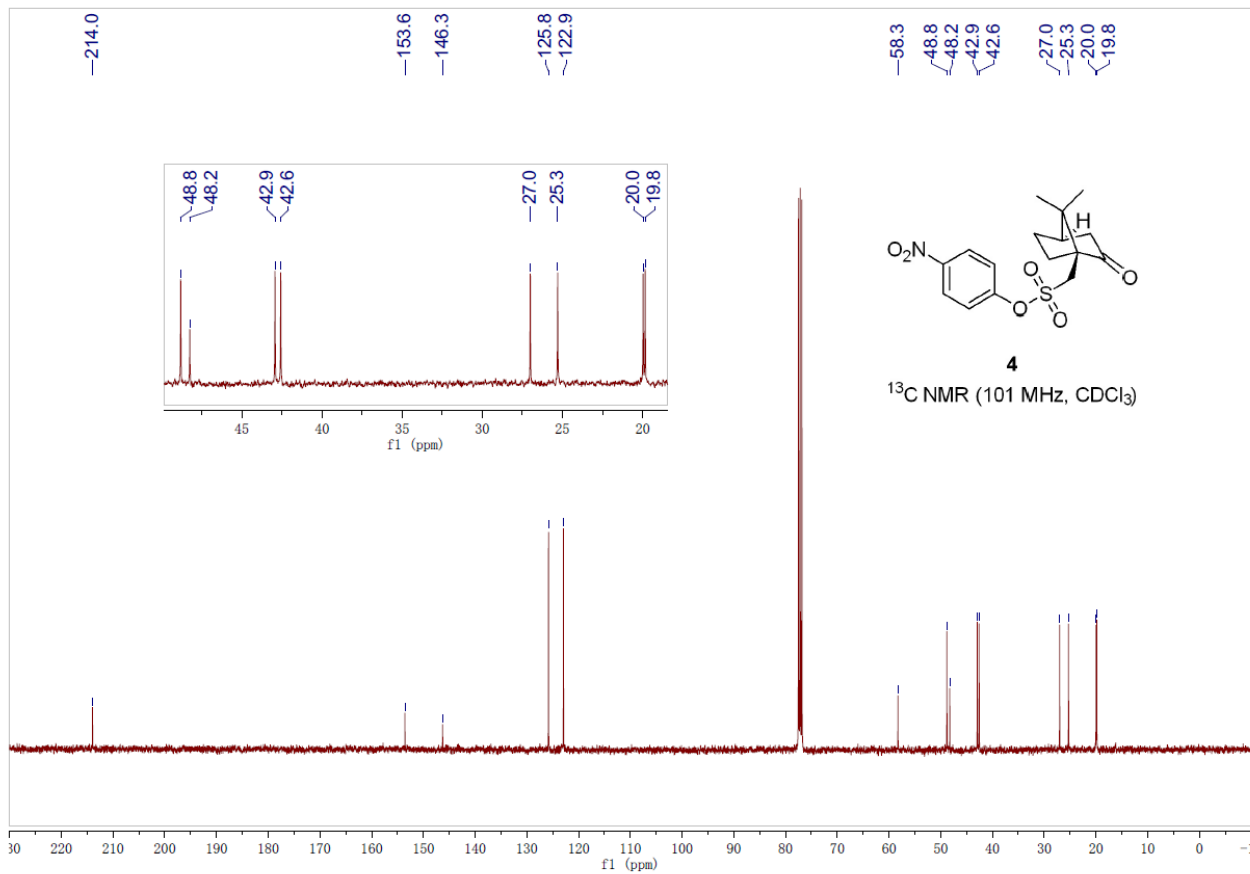

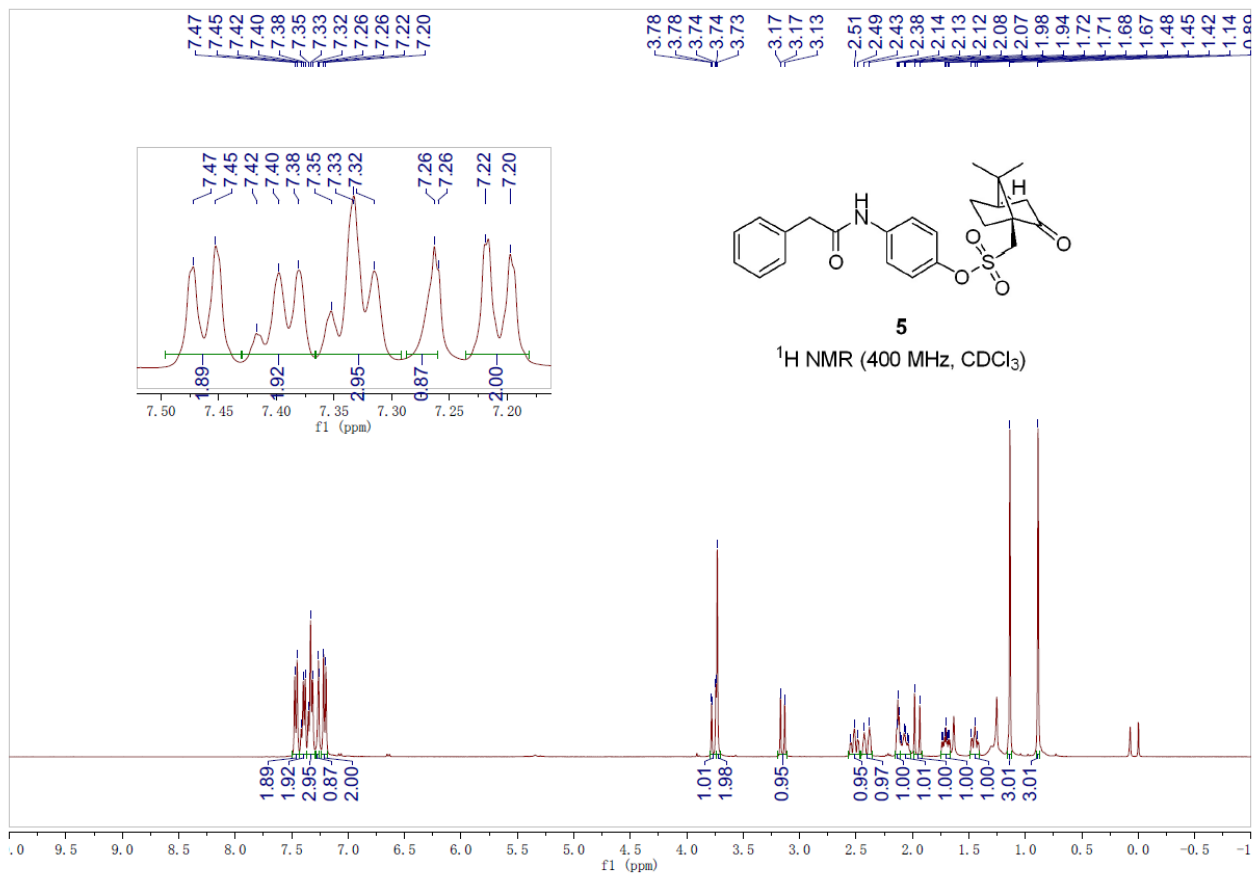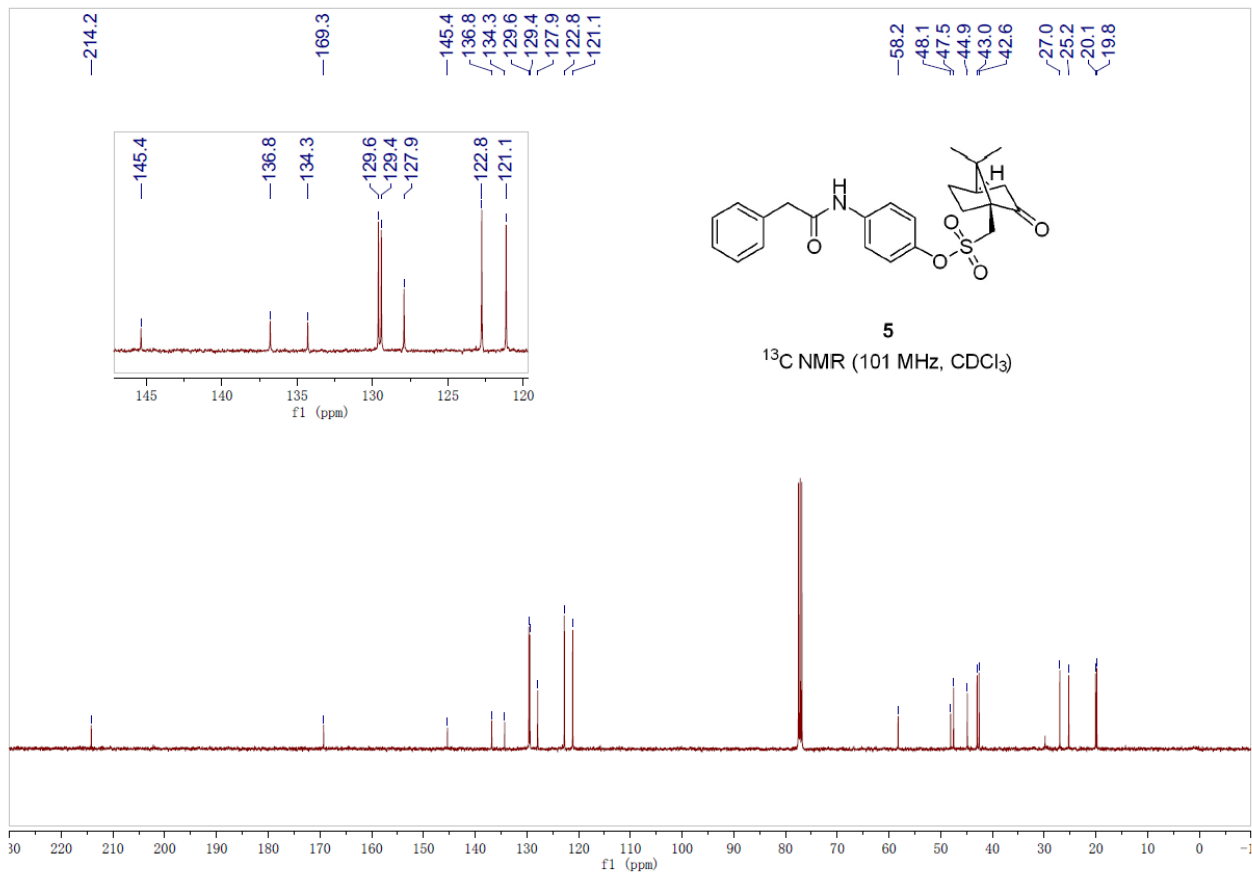

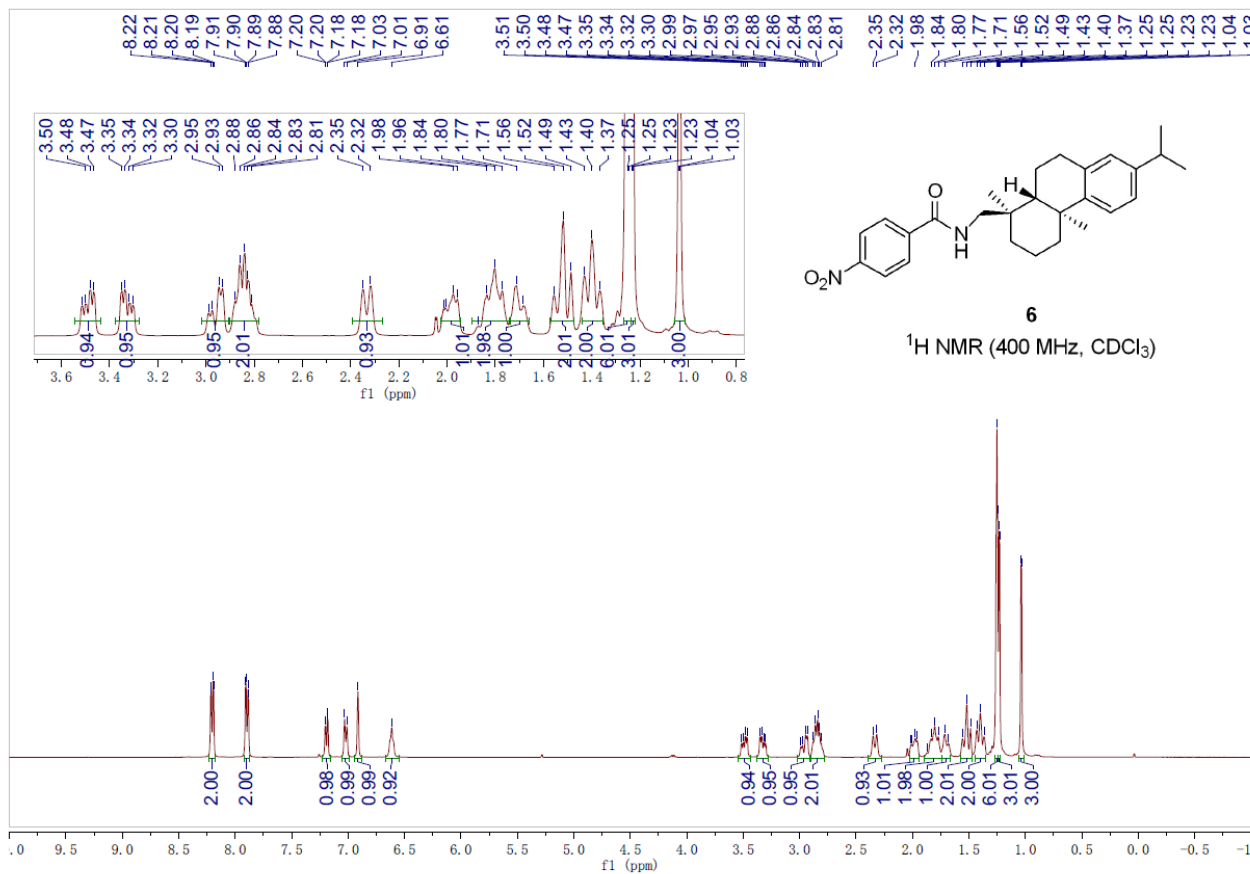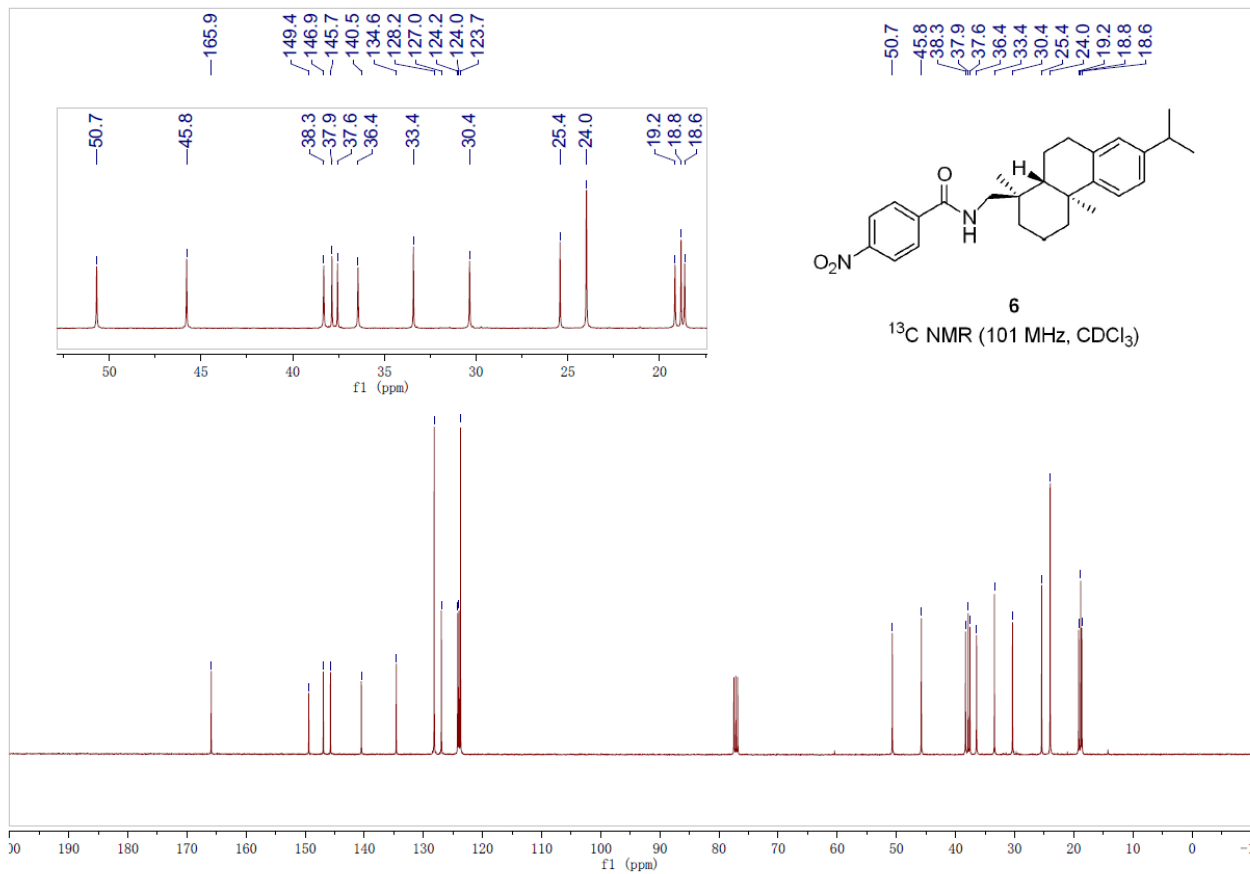

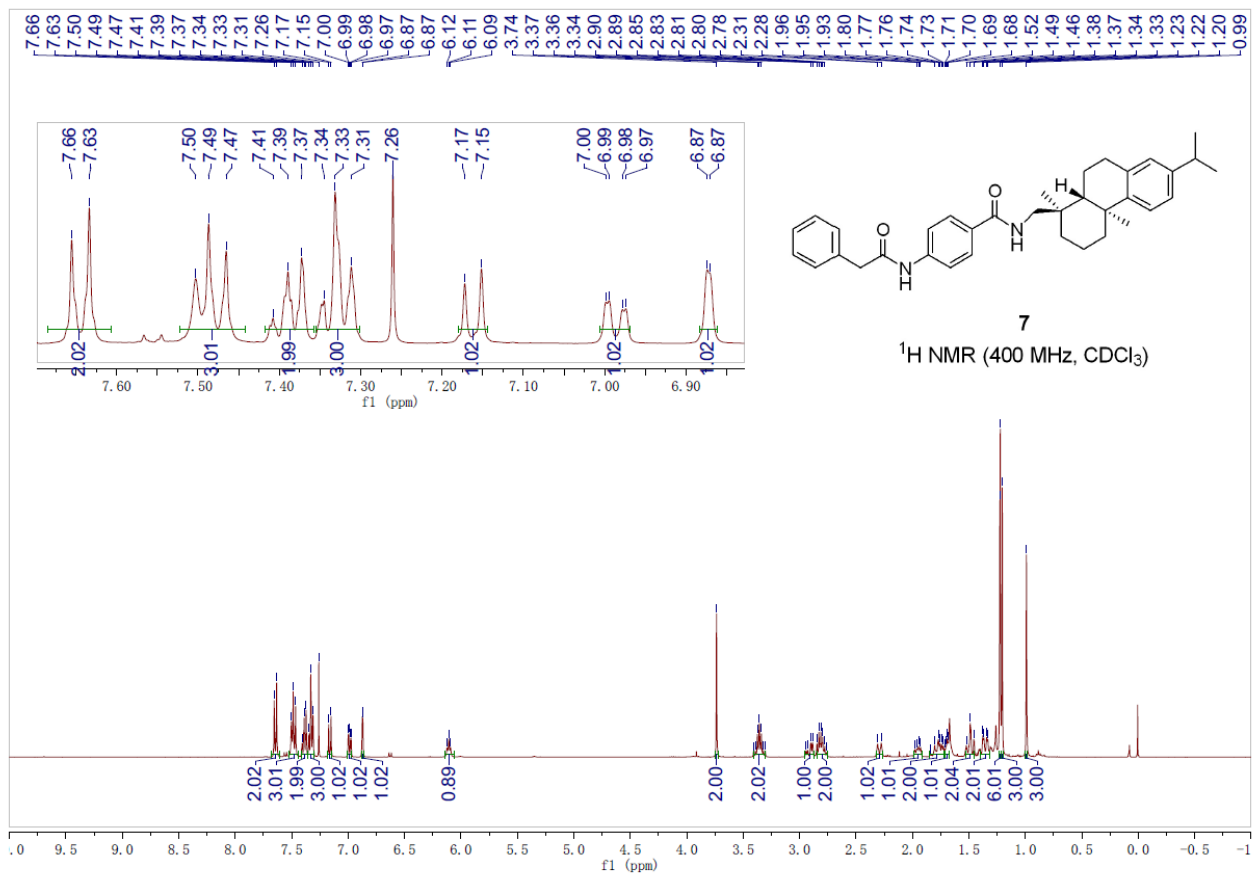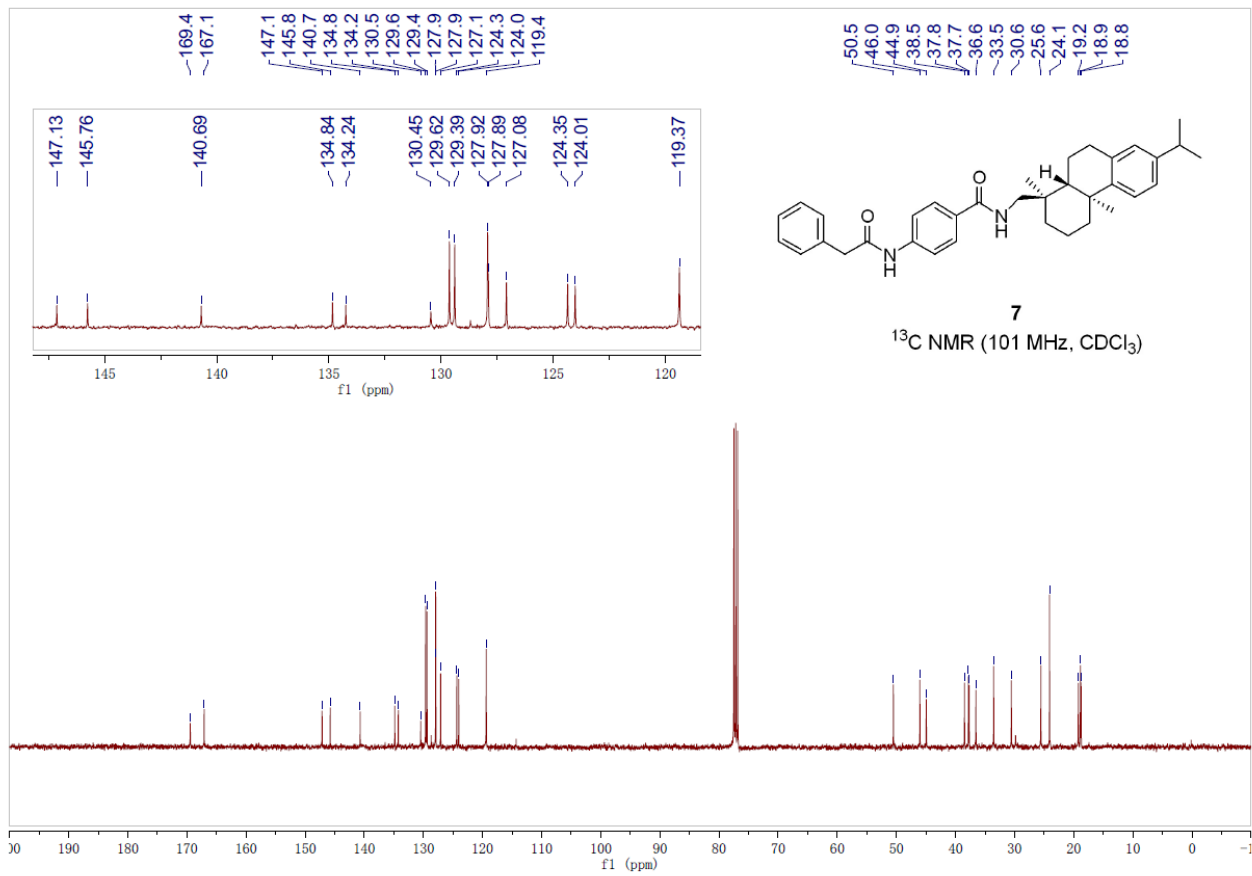

Supplement: d2qo00110a1.pdf [file d2qo00110a1.pdf]
